# Supplementary material
Source: publisher figshare collection journal article supplement (https://acs.figshare.com/ndownloader/files/4366966)

**Supporting Information**

**Stereoselective Synthesis of 2,6-*cis*- and 2,6-*trans*-Piperidines through  
Organocatalytic Aza-Michael Reactions:  
A Facile Synthesis of (+)-Myrtine and (–)-Epimyrtine**

*Yongcheng Ying, Hyoungsu Kim, and Jiyong Hong\**

*Department of Chemistry, Duke University, Durham, NC 27708*

\* To whom correspondence should be addressed.

Tel: 919-660-1545, Fax: 919-660-1605, E-mail: [jiyong.hong@duke.edu](mailto:jiyong.hong@duke.edu)

| <b>Contents</b>                                | <b>Page Number</b> |
|------------------------------------------------|--------------------|
| Experimental Section                           | S2                 |
| Copies of $^1\text{H}$ and $^{13}\text{C}$ NMR | S30                |

### (Z)-Allyl Alcohol (Z)-3

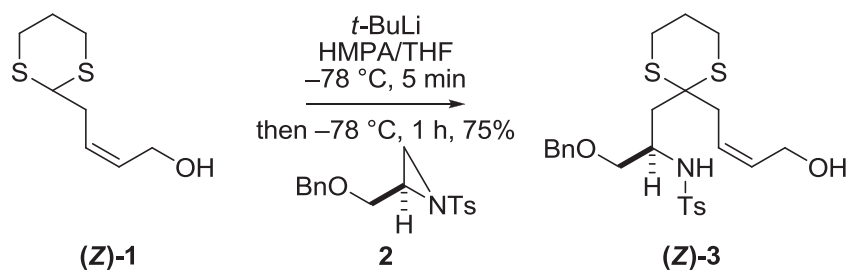

To a cooled ( $-78\text{ }^{\circ}\text{C}$ ) solution of (Z)-1 (100 mg, 0.53 mmol) in HMPA/THF (1:10, 11 mL) was added dropwise *t*-BuLi (0.63 mL, 1.7 M in pentane, 1.07 mmol), and the resulting mixture was stirred for 5 min before aziridine **2**<sup>1</sup> (167 mg, 0.53 mmol) was added. After stirred for 1 h at  $-78\text{ }^{\circ}\text{C}$ , the reaction mixture was quenched with saturated aqueous  $\text{NH}_4\text{Cl}$  and diluted with EtOAc. The layers were separated, and the aqueous layer was extracted with EtOAc. The combined organic layers were washed with brine, dried over anhydrous  $\text{Na}_2\text{SO}_4$ , and concentrated *in vacuo*. The residue was purified by column chromatography (silica gel, hexanes/EtOAc, 2/1 to 1/1) to afford (Z)-3 (201 mg, 75%):  $[\alpha]_{\text{D}}^{26} = +11.5$  (*c* 0.92,  $\text{CHCl}_3$ );  $^1\text{H}$  NMR (400 MHz,  $\text{CDCl}_3$ )  $\delta$  7.71 (d,  $J = 8.0$  Hz, 2H), 7.16–7.36 (m, 7H), 5.74 (ddd,  $J = 11.2, 7.2, 6.4$  Hz, 1H), 5.60 (ddd,  $J = 11.2, 7.2, 6.4$  Hz, 1H), 5.51 (d,  $J = 8.0$  Hz, 1H), 4.29 (AB,  $J_{\text{AB}} = 12.0$  Hz,  $\Delta\nu_{\text{AB}} = 14.8$  Hz, 2H), 4.15–4.22 (m, 1H), 4.03–4.10 (m, 1H), 3.71–3.78 (m, 1H), 3.36 (dd,  $J = 10.0, 3.2$  Hz, 1H), 3.15 (dd,  $J = 10.0, 4.8$  Hz, 1H), 2.61–2.83 (m, 5H), 2.55 (dd,  $J = 15.6, 6.8$  Hz, 1H), 2.38 (s, 3H), 2.31 (dd,  $J = 15.2, 4.8$  Hz, 1H), 2.10 (dd,  $J = 15.6, 6.8$  Hz, 1H), 1.77–1.93 (m, 2H);  $^{13}\text{C}$  NMR (100 MHz,  $\text{CDCl}_3$ )  $\delta$  143.2, 137.8, 137.5, 131.8, 129.5, 128.2, 127.7, 127.6, 127.0, 125.5, 72.9, 71.8, 58.2, 51.4, 51.1, 40.0, 36.3, 26.0, 25.8, 24.6, 21.4; IR (neat) 3273, 1156, 1090, 668  $\text{cm}^{-1}$ ; HRMS (FAB) found 525.1902 [calcd for  $\text{C}_{25}\text{H}_{37}\text{N}_2\text{O}_4\text{S}_3$  ( $\text{M}+\text{NH}_4$ )<sup>+</sup> 525.1910].

<sup>1</sup>Righi, P; Scardovi, N; Marotta, E; ten Holte, P; Zwanenburg, B. *Org. Lett.* **2002**, *4*, 497–500.

**(E)-Allyl Alcohol (E)-3**

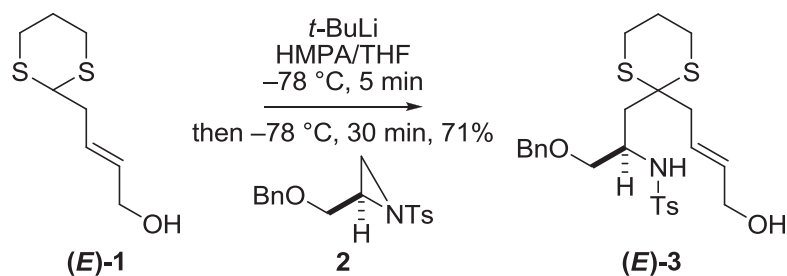

To a cooled ( $-78\text{ }^{\circ}\text{C}$ ) solution of (E)-1 (150 mg, 0.79 mmol) in HMPA/THF (1:10, 11 mL) was added dropwise  $t\text{-BuLi}$  (0.93 mL, 1.7 M in pentane, 1.58 mmol), and the resulting mixture was stirred for 5 min before aziridine **2** (167 mg, 0.53 mmol) was added. After stirred for 0.5 h at  $-78\text{ }^{\circ}\text{C}$ , the reaction mixture was quenched with saturated aqueous  $\text{NH}_4\text{Cl}$  and diluted with EtOAc. The layers were separated, and the aqueous layer was extracted with EtOAc. The combined organic layers were washed with brine, dried over anhydrous  $\text{Na}_2\text{SO}_4$ , and concentrated *in vacuo*. The residue was purified by column chromatography (silica gel, hexanes/EtOAc, 2/1 to 1/1) to afford (E)-3 (285 mg, 71%):  $[\alpha]_{\text{D}}^{26} = +22.5$  ( $c$  2.5,  $\text{CHCl}_3$ );  $^1\text{H}$  NMR (400 MHz,  $\text{CDCl}_3$ )  $\delta$  7.72 (d,  $J = 8.4$  Hz, 2H), 7.20–7.34 (m, 7H), 5.63–5.75 (m, 2H), 5.58 (d,  $J = 8.0$  Hz, 1H), 4.29 (AB,  $J_{\text{AB}} = 12.0$  Hz,  $\Delta\nu_{\text{AB}} = 18.4$  Hz, 2H), 4.04 (d,  $J = 4.4$  Hz, 1H), 3.68–3.76 (m, 1H), 3.45 (dd,  $J = 9.6, 3.6$  Hz, 1H), 3.22 (dd,  $J = 9.6, 5.2$  Hz, 1H), 2.60–2.82 (m, 4H), 2.54 (dd,  $J = 15.6, 6.4$  Hz, 1H), 2.43 (dd,  $J = 15.2, 6.4$  Hz, 1H), 2.38 (s, 3H), 2.32 (dd,  $J = 15.2, 5.2$  Hz, 1H), 2.11 (dd,  $J = 15.6, 6.8$  Hz, 1H), 1.76–1.94 (m, 2H);  $^{13}\text{C}$  NMR (100 MHz,  $\text{CDCl}_3$ )  $\delta$  143.2, 137.8, 137.5, 133.5, 129.5, 128.2, 127.6, 127.0, 125.7, 72.9, 71.8, 63.1, 51.2, 51.0, 41.3, 39.9, 26.0, 25.8, 24.6, 21.4; IR (neat) 3289, 1597, 1326, 1092  $\text{cm}^{-1}$ ; HRMS (FAB) found 525.1901 [calcd for  $\text{C}_{25}\text{H}_{37}\text{N}_2\text{O}_4\text{S}_3$  ( $\text{M}+\text{NH}_4$ ) $^+$  525.1910].

## Secondary Amine-Catalyzed Aza-Michael Reaction

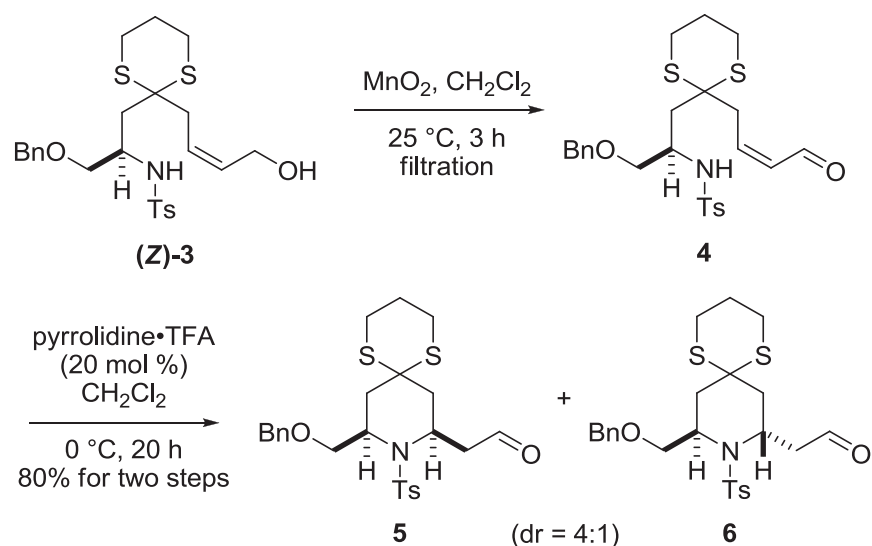

To a stirred solution of (Z)-**3** (10.0 mg, 0.0197 mmol) in  $\text{CH}_2\text{Cl}_2$  (1.0 mL, 0.02 M) was added  $\text{MnO}_2$  (34.3 mg, 0.394 mmol) at  $25^\circ\text{C}$ . After stirred for 3 h at the same temperature, the reaction mixture was then filtered through celite and concentrated *in vacuo*. The crude  $\alpha,\beta$ -unsaturated aldehyde **4** was employed in the next step without further purification:  $^1\text{H}$  NMR (400 MHz,  $\text{CDCl}_3$ )  $\delta$  9.90 (d,  $J = 7.6$  Hz, 1H), 7.69 (d,  $J = 7.6$  Hz, 2H), 7.19–7.34 (m, 7H), 6.68 (ddd,  $J = 11.2, 7.2, 4.0$  Hz, 1H), 6.01 (ddd,  $J = 11.2, 8.0, 7.6$  Hz, 1H), 5.22 (d,  $J = 8.4$  Hz, 1H), 4.33 (s, 2H), 3.70 (brs, 1H), 3.41 (dd,  $J = 9.2, 2.8$  Hz, 1H), 3.20 (dd,  $J = 9.2, 4.8$  Hz, 1H), 3.08 (dd,  $J = 16.8, 7.6$  Hz, 1H), 2.96 (dd,  $J = 16.4, 7.2$  Hz, 1H), 2.78–2.85 (m, 1H), 2.61–2.72 (m, 3H), 2.38 (s, 3H), 2.36 (dd,  $J = 15.2, 4.8$  Hz, 1H), 2.12 (dd,  $J = 15.2, 6.8$  Hz, 1H), 1.74–1.96 (m, 2H).

To a stirred solution of  $\alpha,\beta$ -unsaturated aldehyde **4** (10.0 mg, 0.0197 mmol) in  $\text{CH}_2\text{Cl}_2$  (1.0 mL, 0.02 M) was added pyrrolidine·TFA (0.1 mL, 7.3 mg pyrrolidine·TFA dissolved in 1.0 mL  $\text{CH}_2\text{Cl}_2$ ) at  $0^\circ\text{C}$ . After stirred for 20 h at the same temperature, the reaction mixture was concentrated and purified by column chromatography (silica gel, hexanes/EtOAc, 3/1) to afford an inseparable mixture of 2,6-*cis*-piperidine **5** and 2,6-*trans*-piperidine **6** (8.0 mg, 80%, **5**:**6** = 4:1) as a colorless oil: [**For 5**]  $[\alpha]_{\text{D}}^{28} = +10.3$  ( $c$  0.32,  $\text{CHCl}_3$ );  $^1\text{H}$  NMR (400 MHz,  $\text{CDCl}_3$ )  $\delta$

9.72 (s, 1H), 7.70 (d,  $J = 8.0$  Hz, 2H), 7.26–7.37 (m, 7H), 4.57 (AB,  $J_{AB} = 11.6$  Hz,  $\Delta\nu_{AB} = 20.4$  Hz, 2H), 4.46–4.53 (m, 1H), 4.15–4.22 (m, 1H), 3.97 (dd,  $J = 8.8, 8.8$  Hz, 1H), 3.72 (dd,  $J = 8.8, 4.4$  Hz, 1H), 3.23 (dd,  $J = 18.0, 8.8$  Hz, 1H), 3.08 (dd,  $J = 18.0, 4.4$  Hz, 1H), 2.71–2.86 (m, 4H), 2.51 (dd,  $J = 15.2, 4.0$  Hz, 1H), 2.41 (s, 3H), 2.19 (dd,  $J = 14.8, 3.6$  Hz, 1H), 1.94 (dd,  $J = 14.8, 6.4$  Hz, 1H), 1.83–1.94 (m, 2H), 1.79 (dd,  $J = 15.2, 6.8$  Hz, 1H);  $^{13}\text{C}$  NMR (100 MHz,  $\text{CDCl}_3$ )  $\delta$  200.2, 143.7, 137.9, 136.7, 129.8, 128.4, 127.9, 127.7, 127.2, 73.3, 73.0, 51.6, 46.8, 44.3, 38.6, 35.3, 26.8, 26.7, 24.6, 21.5; IR (neat) 1721, 1327, 1098  $\text{cm}^{-1}$ ; HRMS (FAB) found 506.1482 [calcd for  $\text{C}_{25}\text{H}_{32}\text{NO}_4\text{S}_3$  ( $\text{M}+\text{H}$ ) $^+$  506.1488]. **[For 6]**  $^1\text{H}$  NMR (400 MHz,  $\text{CDCl}_3$ )  $\delta$  9.50 (s, 1H), 7.73 (d,  $J = 8.4$  Hz, 2H), 7.26–7.37 (m, 5H), 7.14 (d,  $J = 8.8$  Hz, 2H), 4.51 (AB,  $J_{AB} = 11.6$  Hz,  $\Delta\nu_{AB} = 24.4$  Hz, 2H), 4.37–4.47 (m, 2H), 4.03 (dd,  $J = 9.6, 7.2$  Hz, 1H), 3.77 (dd,  $J = 10.0, 6.8$  Hz, 1H), 3.12 (dd,  $J = 18.4, 6.4$  Hz, 1H), 2.97 (dd,  $J = 18.4, 8.0$  Hz, 1H), 2.72–2.90 (m, 4H), 2.35 (s, 3H), 2.26 (dd,  $J = 6.4, 5.6$  Hz, 2H), 2.21 (d,  $J = 3.6$  Hz, 1H), 2.20 (d,  $J = 6.8$  Hz, 1H), 1.86–2.00 (m, 2H);  $^{13}\text{C}$  NMR (100 MHz,  $\text{CDCl}_3$ )  $\delta$  198.9, 143.3, 139.4, 138.0, 129.5, 128.3, 127.8, 127.7, 127.6, 73.0, 70.6, 54.5, 47.7, 47.5, 46.5, 40.7, 37.8, 26.33, 26.29, 24.9, 21.5; IR (neat) 1722, 1326, 1305, 1085  $\text{cm}^{-1}$ ; HRMS (FAB) found 506.1489 [calcd for  $\text{C}_{25}\text{H}_{32}\text{NO}_4\text{S}_3$  ( $\text{M}+\text{H}$ ) $^+$  506.1488].

### Representative Procedures for Organocatalytic Allylic Oxidation/Aza-Michael Reactions

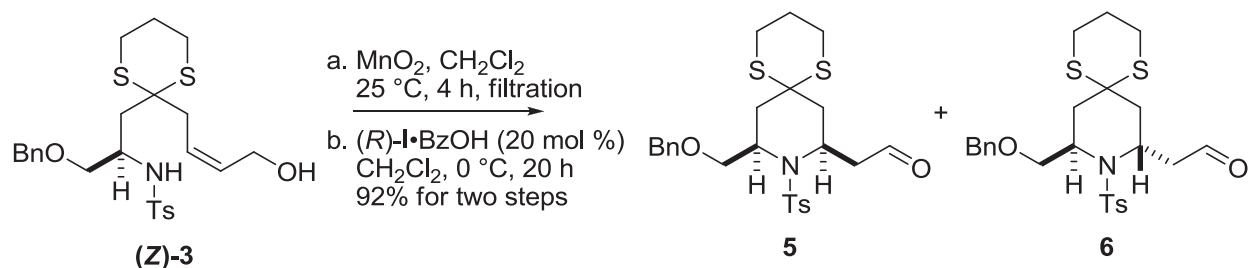

To a stirred solution of (Z)-3 (13.0 mg, 0.0256 mmol) in  $\text{CH}_2\text{Cl}_2$  (1.5 mL, 0.0171 M) was added  $\text{MnO}_2$  (50.6 mg, 0.512 mmol) at 25 °C. After stirred for 4 h at the same temperature, the reaction mixture was then filtered through celite and concentrated *in vacuo*. To a stirred solution of  $\alpha,\beta$ -



## Optimization of Reaction Conditions

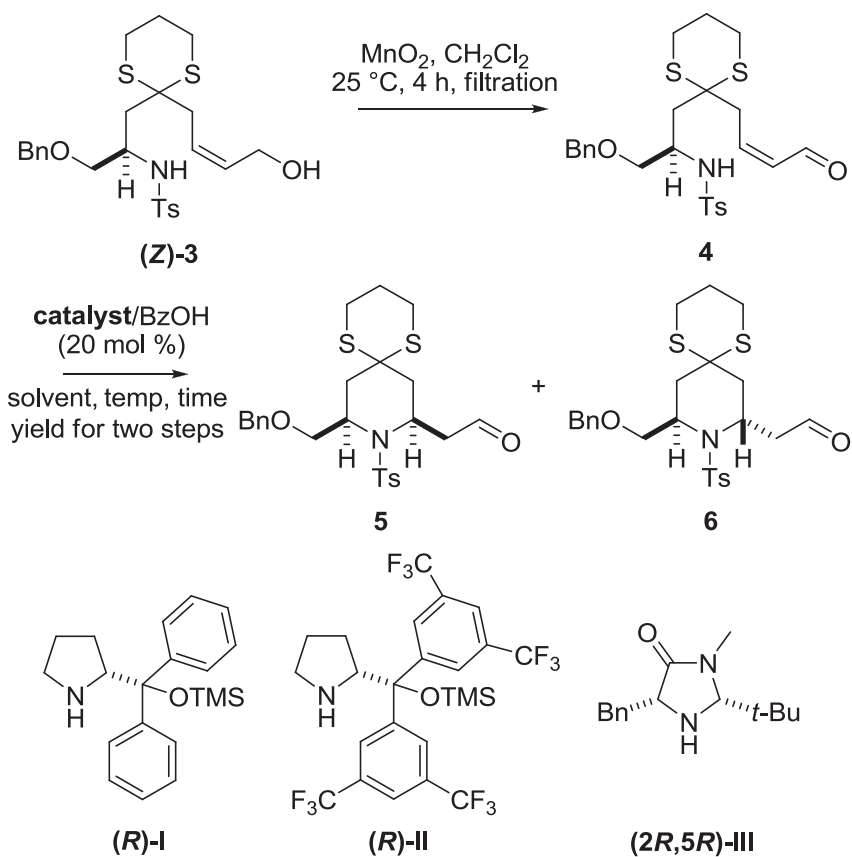

| entry | catalyst           | solvent                         | temp (°C) | time (h) | yield (%) <sup>a</sup> | dr <sup>b</sup> |
|-------|--------------------|---------------------------------|-----------|----------|------------------------|-----------------|
| 1     | <b>(R)-I</b>       | CH <sub>2</sub> Cl <sub>2</sub> | 0         | 20       | 92                     | 11:1            |
| 2     | <b>(R)-II</b>      | CH <sub>2</sub> Cl <sub>2</sub> | 0         | 20       | 92                     | 11:1            |
| 3     | <b>(2R,5R)-III</b> | CH <sub>2</sub> Cl <sub>2</sub> | 0         | 24       | 73                     | 4:1             |
| 4     | <b>(R)-I</b>       | toluene                         | 0         | 20       | 94                     | 9:1             |
| 5     | <b>(R)-I</b>       | ether                           | 0         | 48       | 45                     | 4.5:1           |
| 6     | <b>(R)-I</b>       | MeOH                            | 0         | 48       | 86                     | 4:1             |
| 7     | <b>(R)-I</b>       | MeCN                            | 0         | 48       | 86                     | 4.5:1           |
| 8     | <b>(R)-I</b>       | DMF                             | 0         | 72       | 28                     | 4:1             |
| 9     | <b>(R)-I</b>       | THF                             | 0         | 72       | NR <sup>c</sup>        | NA <sup>d</sup> |
| 10    | <b>(R)-I</b>       | dioxane                         | 25        | 72       | NR <sup>c</sup>        | NA <sup>d</sup> |

<sup>a</sup> Combined yield of **5** and **6**. <sup>b</sup> Diastereomeric ratio (**5**:**6**) determined by integration of the <sup>1</sup>H NMR spectrum of the crude product. <sup>c</sup> No reaction. <sup>d</sup> Not applicable

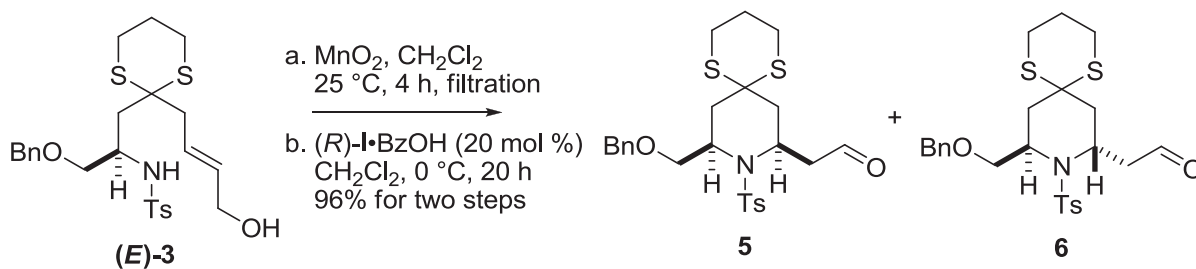

To a stirred solution of **(E)-3** (23.0 mg, 0.0453 mmol) in  $\text{CH}_2\text{Cl}_2$  (1.5 mL, 0.0302 M) was added  $\text{MnO}_2$  (89.6 mg, 0.906 mmol) at  $25^\circ\text{C}$ . After stirred for 4 h at the same temperature, the reaction mixture was then filtered through celite and concentrated *in vacuo*. To a stirred solution of  $\alpha,\beta$ -unsaturated aldehyde intermediate in  $\text{CH}_2\text{Cl}_2$  (2.0 mL, 0.0227 M) was added **(R)-I-BzOH** (4.0 mg, 0.0091 mmol) at  $0^\circ\text{C}$ . After stirred for 20 h at the same temperature, the reaction mixture was concentrated and purified by column chromatography (silica gel, hexanes/EtOAc, 3/1) to afford an inseparable mixture of 2,6-*cis*-piperidine **5** and 2,6-*trans*-piperidine **6** (22.0 mg, 96%, **5:6** = 15:1) as a colorless oil.

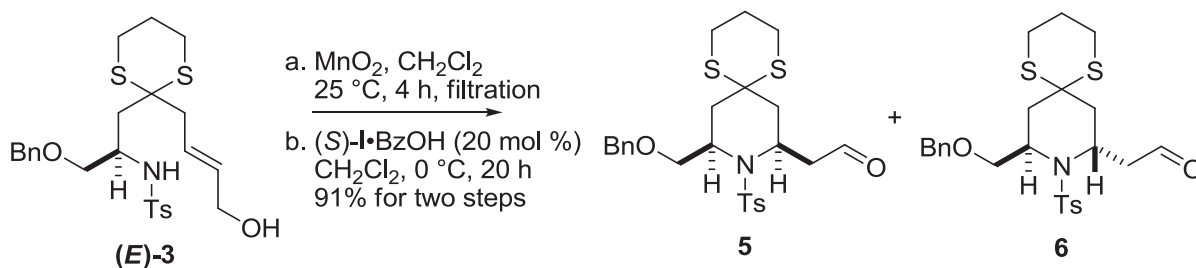

To a stirred solution of **(E)-3** (23.0 mg, 0.0453 mmol) in  $\text{CH}_2\text{Cl}_2$  (1.5 mL, 0.0302 M) was added  $\text{MnO}_2$  (89.6 mg, 0.906 mmol) at  $25^\circ\text{C}$ . After stirred for 4 h at the same temperature, the reaction mixture was then filtered through celite and concentrated *in vacuo*. To a stirred solution of  $\alpha,\beta$ -unsaturated aldehyde intermediate in  $\text{CH}_2\text{Cl}_2$  (2.0 mL, 0.0227 M) was added **(S)-I-BzOH** (4.0 mg, 0.0091 mmol) at  $0^\circ\text{C}$ . After stirred for 20 h at the same temperature, the reaction mixture was concentrated and purified by column chromatography (silica gel, hexanes/EtOAc, 3/1) to afford an inseparable mixture of 2,6-*cis*-piperidine **5** and 2,6-*trans*-piperidine **6** (21.0 mg, 91%, **5:6** = 1:5) as a colorless oil.



## Substrate Scope of the Organocatalytic Aza-Michael Reaction

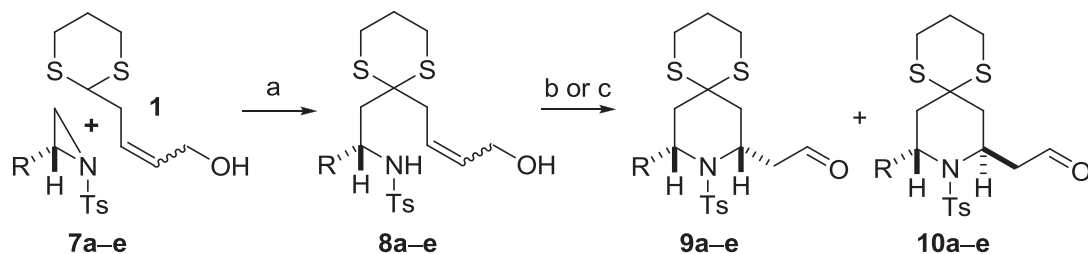

| entry | R                  | allyl alcohol<br>(yield) | Reaction<br>conditions (time) <sup>a</sup> | major product<br>(yield) <sup>b</sup> | dr <sup>c</sup> |
|-------|--------------------|--------------------------|--------------------------------------------|---------------------------------------|-----------------|
| 1     | OBn                | <b>(Z)-8a</b> (75%)      | b (24 h)                                   | <b>9a</b> (91%)                       | 11:1            |
|       |                    |                          | c (24 h)                                   | <b>10a</b> (82%)                      | 1:3             |
|       |                    | <b>(E)-8a</b> (81%)      | b (20 h)                                   | <b>9a</b> (93%)                       | 15:1            |
|       |                    |                          | c (20 h)                                   | <b>10a</b> (86%)                      | 1:5             |
| 2     | Me                 | <b>(Z)-8b</b> (60%)      | b (7 h)                                    | <b>9b</b> (90%)                       | >15:1           |
|       |                    |                          | c (10 h)                                   | <b>10b</b> (75%)                      | 1:2             |
|       |                    | <b>(E)-8b</b> (66%)      | b (7 h)                                    | <b>9b</b> (97%)                       | >20:1           |
|       |                    |                          | c (9 h)                                    | <b>10b</b> (80%)                      | 1:4             |
| 3     | <i>i</i> -Pr       | <b>(Z)-8c</b> (30%)      | b (45 h)                                   | <b>9c</b> (78%)                       | 10:1            |
|       |                    |                          | c (64 h)                                   | <b>10c</b> (78%)                      | 1:8             |
|       |                    | <b>(E)-8c</b> (50%)      | b (45 h)                                   | <b>9c</b> (87%)                       | 12:1            |
|       |                    |                          | c (67 h)                                   | <b>10c</b> (79%)                      | 1:10            |
| 4     | CH=CH <sub>2</sub> | <b>(Z)-8d</b> (30%)      | b (15 h)                                   | <b>9d</b> (90%)                       | 15:1            |
|       |                    |                          | c (18 h)                                   | <b>10d</b> (86%)                      | 1:1             |
| 5     | <i>t</i> -Bu       | <b>(Z)-8e</b> (14%)      | b (24 h)                                   | NR <sup>d</sup>                       | NA <sup>e</sup> |
|       |                    |                          | c (24 h)                                   | NR <sup>d</sup>                       |                 |

<sup>a</sup> Reagents and conditions: (a) *t*-BuLi, HMPA/THF (1:10), −78 °C, 5 min, then, **7a–e**,<sup>2</sup> −78 °C, 0.5–1 h, 14–81%; (b) MnO<sub>2</sub>, CH<sub>2</sub>Cl<sub>2</sub>, 25 °C, 3 h, filtration; (*S*)-**I**·BzOH (20 mol %), CH<sub>2</sub>Cl<sub>2</sub>, 0 °C; (c) i. MnO<sub>2</sub>, CH<sub>2</sub>Cl<sub>2</sub>, 25 °C, 3 h, filtration; ii. (*R*)-**I**·BzOH (20 mol %), CH<sub>2</sub>Cl<sub>2</sub>, 0 °C. <sup>b</sup> Combined yield of **9** and **10**. <sup>c</sup> Diastereomeric ratio (2,6-*cis*-piperidine:2,6-*trans*-piperidine) determined by integration of the <sup>1</sup>H NMR spectrum of the crude product. <sup>d</sup> No reaction. <sup>e</sup> Not applicable.

<sup>2</sup>(a) Lapinsky, D. J; Bergmeier, S. C. *Tetrahedron Lett.* **2001**, 42, 8583–8586. (b) Vicario, J. L; Badia, D; Carrillo, L. *ARKIVOC* **2007**, 304–311.

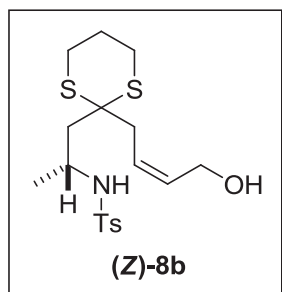

A colorless oil:  $[\alpha]_D^{27} = -1.7$  (*c* 1.00,  $\text{CHCl}_3$ );  $^1\text{H}$  NMR (400 MHz,  $\text{CDCl}_3$ )  $\delta$  7.72 (d,  $J = 8.0$  Hz, 2H), 7.24 (d,  $J = 8.0$  Hz, 2H), 5.71 (ddd,  $J = 11.2, 7.2, 6.4$  Hz, 1H), 5.66 (d,  $J = 6.4$  Hz, 1H), 5.53 (ddd,  $J = 10.8, 7.2, 6.4$  Hz, 1H), 4.15 (dd,  $J = 12.4, 7.6$  Hz, 1H), 4.03 (dd,  $J = 12.4, 6.4$  Hz, 1H), 3.52–3.62 (m, 1H), 2.62–2.80 (m, 5H), 2.46–2.52 (m, 1H), 2.36 (s, 3H), 2.12 (dd,  $J = 15.2, 8.0$  Hz, 1H), 1.87 (dd,  $J = 15.2, 4.0$  Hz, 1H), 1.78–1.94 (m, 2H), 1.00 (d,  $J = 6.8$  Hz, 3H);  $^{13}\text{C}$  NMR (100 MHz,  $\text{CDCl}_3$ )  $\delta$  143.2, 137.8, 131.8, 129.5, 127.1, 125.6, 58.2, 51.2, 47.4, 44.6, 36.2, 26.0, 24.5, 23.0, 21.4; IR (neat) 3279, 1320, 1158, 668  $\text{cm}^{-1}$ ; HRMS (FAB) found 419.1491 [calcd for  $\text{C}_{18}\text{H}_{31}\text{N}_2\text{O}_3\text{S}_3$  ( $\text{M}+\text{NH}_4$ ) $^+$  419.1491].

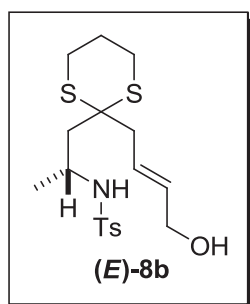

A colorless oil:  $[\alpha]_D^{28.0} = -14.9$  (*c* 1.00,  $\text{CHCl}_3$ );  $^1\text{H}$  NMR (400 MHz,  $\text{CDCl}_3$ )  $\delta$  7.75 (d,  $J = 8.8$  Hz, 2H), 7.24 (d,  $J = 8.8$  Hz, 2H), 5.76 (d,  $J = 6.4$  Hz, 1H), 5.60–5.73 (m, 2H), 4.07 (br s, 2H), 3.51–3.61 (m, 1H), 2.68–2.82 (m, 4H), 2.54 (dd,  $J = 14.4, 6.0$  Hz, 1H), 2.38–2.48 (m, 2H), 2.39 (s, 3H), 2.19 (dd,  $J = 15.2, 7.6$  Hz, 1H), 1.79–1.96 (m, 3H), 1.08 (d,  $J = 6.4$  Hz, 3H);  $^{13}\text{C}$  NMR (100 MHz,  $\text{CDCl}_3$ )  $\delta$  143.2, 137.7, 133.5, 129.5, 127.2, 125.6, 63.0, 51.0, 47.4, 44.6, 41.3, 26.0, 24.6, 23.1, 21.4; IR (neat) 3280, 1321, 1158, 1090, 668  $\text{cm}^{-1}$ ; HRMS (FAB) found 419.1487 [calcd for  $\text{C}_{18}\text{H}_{31}\text{N}_2\text{O}_3\text{S}_3$  ( $\text{M}+\text{NH}_4$ ) $^+$  419.1491].

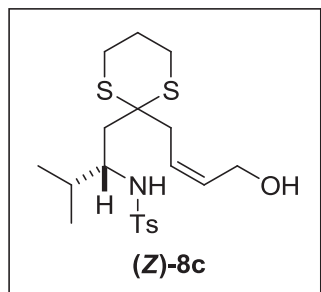

A colorless oil:  $[\alpha]_D^{22} = -3.1$  (*c* 0.15,  $\text{CHCl}_3$ );  $^1\text{H}$  NMR (400 MHz,  $\text{CDCl}_3$ )  $\delta$  7.75 (d,  $J = 8.4$  Hz, 2H), 7.27 (d,  $J = 8.0$  Hz, 2H), 5.77 (ddd,  $J = 11.2, 7.2, 6.4$  Hz, 1H), 5.58 (ddd,  $J = 11.2, 7.2, 6.0$  Hz, 1H), 5.32 (d,  $J = 6.8$  Hz, 1H), 4.18–4.24 (m, 1H), 4.04–4.10 (m, 1H), 3.56–3.62 (m, 1H), 2.69–2.81 (m, 5H), 2.56 (dd,  $J = 16.0, 5.6$  Hz, 1H), 2.40 (s, 3H), 2.28 (br s, 1H), 1.82–1.99 (m, 5H), 0.80 (d,  $J = 7.2$  Hz, 3H), 0.70 (d,  $J = 6.8$  Hz, 3H);  $^{13}\text{C}$  NMR (100 MHz,  $\text{CDCl}_3$ )  $\delta$  143.2, 138.3, 131.9, 129.5, 127.1, 125.9, 58.3, 55.9,

51.3, 37.1, 36.0, 31.3, 26.2, 26.1, 24.6, 21.5, 18.2, 15.9; IR (neat) 3288, 1320, 1157, 1092, 668  $\text{cm}^{-1}$ ; HRMS (FAB) found 447.1793 [calcd for  $\text{C}_{20}\text{H}_{35}\text{N}_2\text{O}_3\text{S}_3$  ( $\text{M}+\text{NH}_4$ ) $^+$  447.1804].

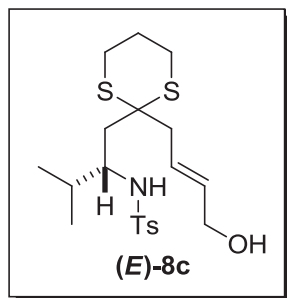

A colorless oil:  $[\alpha]_{\text{D}}^{28} = -9.5$  ( $c$  1.06,  $\text{CHCl}_3$ );  $^1\text{H}$  NMR (400 MHz,  $\text{CDCl}_3$ )  $\delta$  7.74 (d,  $J = 8.4$  Hz, 2H), 7.26 (d,  $J = 8.0$  Hz, 2H), 5.62–5.75 (m, 2H), 5.51 (d,  $J = 7.2$  Hz, 1H), 4.08 (br s, 2H), 3.50–3.56 (m, 1H), 2.67–2.82 (m, 4H), 2.56 (dd,  $J = 14.4, 6.0$  Hz, 1H), 2.43 (dd,  $J = 14.0, 4.8$  Hz, 1H), 2.39 (s, 3H), 1.84–2.01 (m, 5H), 0.79 (d,  $J = 7.2$  Hz, 3H), 0.70 (d,  $J = 7.2$  Hz, 3H);  $^{13}\text{C}$  NMR (100 MHz,  $\text{CDCl}_3$ )  $\delta$  143.1, 138.1, 133.3, 129.4, 127.1, 126.0, 63.1, 55.8, 51.1, 40.9, 37.6, 31.4, 26.1, 26.0, 24.6, 21.4, 18.0, 16.1; IR (neat) 3280, 1318, 1155, 666  $\text{cm}^{-1}$ ; HRMS (FAB) found 447.1793 [calcd for  $\text{C}_{20}\text{H}_{35}\text{N}_2\text{O}_3\text{S}_3$  ( $\text{M}+\text{NH}_4$ ) $^+$  447.1804].

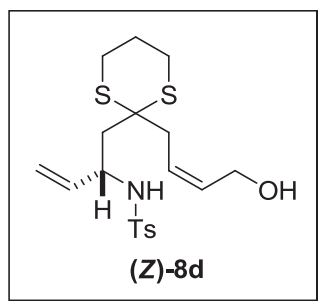

A colorless oil:  $[\alpha]_{\text{D}}^{28} = +7.3$  ( $c$  0.48,  $\text{CHCl}_3$ );  $^1\text{H}$  NMR (400 MHz,  $\text{CDCl}_3$ )  $\delta$  7.70 (d,  $J = 8.4$  Hz, 2H), 7.25 (d,  $J = 8.4$  Hz, 2H), 5.78 (ddd,  $J = 11.6, 7.2, 5.2$  Hz, 1H), 5.48–5.65 (m, 3H), 4.92 (d,  $J = 17.6$  Hz, 1H), 4.86 (d,  $J = 10.0$  Hz, 1H), 4.17–4.25 (m, 1H), 4.04–4.12 (m, 1H), 2.70–2.91 (m, 5H), 2.55 (dd,  $J = 15.6, 6.4$  Hz, 1H), 2.39 (s, 3H), 2.27 (dd,  $J = 15.2, 8.0$  Hz, 1H), 2.03 (dd,  $J = 15.2, 4.4$  Hz, 1H), 1.94–2.02 (m, 2H), 1.82–1.92 (m, 1H);  $^{13}\text{C}$  NMR (100 MHz,  $\text{CDCl}_3$ )  $\delta$  143.4, 138.1, 137.6, 132.0, 129.4, 127.5, 125.6, 116.3, 58.3, 54.4, 51.2, 42.7, 36.6, 26.2, 26.1, 24.7, 21.5; IR (neat) 3270, 1324, 1158, 1093, 668  $\text{cm}^{-1}$ ; HRMS (FAB) found 431.1482 [calcd for  $\text{C}_{19}\text{H}_{31}\text{N}_2\text{O}_3\text{S}_3$  ( $\text{M}+\text{NH}_4$ ) $^+$  431.1491].

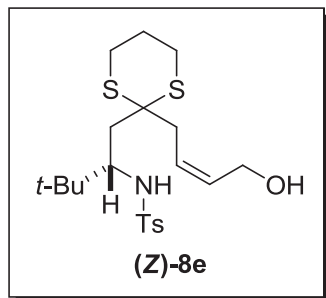

A colorless oil:  $[\alpha]_{\text{D}}^{27} = -5.0$  ( $c$  0.14,  $\text{CHCl}_3$ );  $^1\text{H}$  NMR (400 MHz,  $\text{CDCl}_3$ )  $\delta$  7.72 (d,  $J = 8.4$  Hz, 2H), 7.22 (d,  $J = 8.4$  Hz, 2H), 5.77–5.83 (m, 1H), 5.67 (ddd,  $J = 12.0, 6.4, 5.6$  Hz, 1H), 4.73 (d,  $J = 8.4$  Hz, 1H), 4.16–4.26 (m, 1H), 4.07–4.16 (m, 1H), 3.77 (ddd,  $J = 9.2, 9.2, 1.6$  Hz, 1H), 2.93 (dd,  $J = 17.2, 8.0$  Hz, 1H), 2.70–2.86 (m, 5H),

2.39 (s, 3H), 2.26 (dd,  $J = 15.6, 1.6$  Hz, 1H), 2.09 (s, 1H), 1.89–1.99 (m, 2H), 1.89 (dd,  $J = 15.2, 10.0$  Hz, 1H), 0.80 (s, 9H);  $^{13}\text{C}$  NMR (100 MHz,  $\text{CDCl}_3$ )  $\delta$  142.7, 139.8, 131.4, 129.2, 127.0, 126.9, 60.7, 58.3, 51.8, 39.4, 36.5, 35.4, 27.0, 26.29, 26.25, 24.8, 21.5; IR (neat) 1653, 1153  $\text{cm}^{-1}$ ; HRMS (FAB) found 461.1962 [calcd for  $\text{C}_{21}\text{H}_{33}\text{N}_2\text{O}_3\text{S}_3$  ( $\text{M}+\text{NH}_4$ ) $^+$  461.1961].

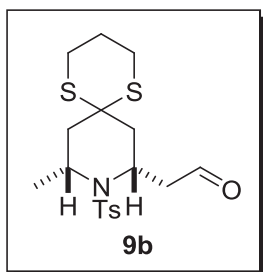

An inseparable mixture (**9b**:**10b** > 20:1):  $[\alpha]_{\text{D}}^{25} = +15.7$  ( $c$  0.4,  $\text{CHCl}_3$ );  $^1\text{H}$  NMR (400 MHz,  $\text{CDCl}_3$ )  $\delta$  9.78 (s, 1H), 7.70 (d,  $J = 6.4$  Hz, 2H), 7.29 (d,  $J = 8.0$  Hz, 2H), 4.47–4.53 (m, 1H), 4.06–4.17 (m, 1H), 3.41 (dd,  $J = 18.0, 9.6$  Hz, 1H), 3.17 (dd,  $J = 18.4, 4.8$  Hz, 1H), 2.65–2.89 (m, 4H), 2.41(s, 3H), 2.35 (dd,  $J = 15.2, 4.4$  Hz, 1H), 1.82–2.03 (m, 5H), 1.54 (d,  $J = 7.2$  Hz, 3H);  $^{13}\text{C}$  NMR (100 MHz,  $\text{CDCl}_3$ )  $\delta$  200.5, 143.5, 136.8, 129.8, 127.1, 51.3, 48.2, 47.1, 44.4, 41.3, 38.0, 26.8, 26.7, 24.8, 24.6, 21.5; IR (neat) 1720, 1160  $\text{cm}^{-1}$ ; HRMS (FAB) found 400.1067 [calcd for  $\text{C}_{18}\text{H}_{26}\text{NO}_3\text{S}_3$  ( $\text{M}+\text{H}$ ) $^+$  400.1069].

An inseparable mixture (**9b**:**10b** = 1:4):  $^1\text{H}$  NMR (400 MHz,  $\text{CDCl}_3$ )  $\delta$  9.71 (s, 1H), 7.69 (d,  $J = 8.8$  Hz, 2H), 7.27 (d,  $J = 8.4$  Hz, 2H), 4.74–4.81 (m, 1H), 3.98–4.08 (m, 1H), 3.13–3.27 (m, 2H), 2.68–2.95 (m, 4H), 2.41(s, 3H), 2.36 (dd,  $J = 14.8, 5.6$  Hz, 1H), 2.26 (dd,  $J = 14.4, 4.4$  Hz, 1H), 2.13 (dd,  $J = 14.4, 4.0$  Hz, 1H), 1.84–2.04 (m, 3H), 1.38 (d,  $J = 6.8$  Hz, 3H);  $^{13}\text{C}$  NMR (100 MHz,  $\text{CDCl}_3$ )  $\delta$  199.8, 143.3, 139.9, 129.6, 127.0, 49.1, 48.5, 47.5, 47.1, 43.2, 39.8, 26.4, 26.3, 25.0, 21.5, 20.2.

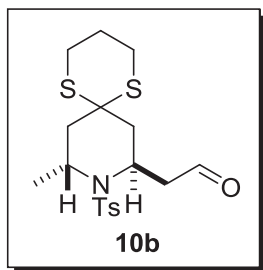

43.2, 39.8, 26.4, 26.3, 25.0, 21.5, 20.2.

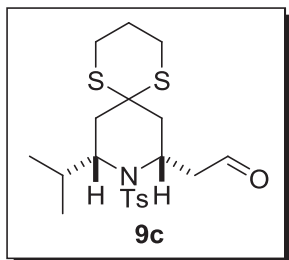

A colorless crystal:  $[\alpha]_{\text{D}}^{27} = +69.6$  ( $c$  0.43,  $\text{CHCl}_3$ );  $^1\text{H}$  NMR (400 MHz,  $\text{CDCl}_3$ )  $\delta$  9.65 (s, 1H), 7.72 (d,  $J = 8.4$  Hz, 2H), 7.29 (d,  $J = 8.0$  Hz, 2H), 4.18–4.24 (m, 1H), 3.65–3.70 (m, 1H), 3.41 (dd,  $J = 18.4, 7.2$  Hz, 1H), 2.89–3.01 (m, 2H), 2.87 (dd,  $J = 18.4, 8.0$  Hz, 1H), 2.59–2.70 (m, 2H), 2.42 (s, 3H), 2.30 (dd,  $J = 14.0, 9.6$  Hz, 1H), 2.20 (dd,  $J =$

15.2, 2.0 Hz, 1H), 2.07 (dd,  $J = 14.8, 6.0$  Hz, 1H), 1.92–2.00 (m, 1H), 1.72–1.82 (m, 1H), 1.43 (dd,  $J = 15.6, 6.4$  Hz, 1H), 1.09 (d,  $J = 6.4$  Hz, 3H), 1.00 (d,  $J = 6.4$  Hz, 3H);  $^{13}\text{C}$  NMR (100 MHz,  $\text{CDCl}_3$ )  $\delta$  200.5, 143.6, 136.6, 129.8, 127.4, 59.7, 50.9, 47.3, 44.4, 37.5, 36.5, 33.0, 27.0, 26.7, 24.5, 21.5, 20.9, 20.6; IR (neat) 1720, 1598, 1338, 1326, 1095  $\text{cm}^{-1}$ ; HRMS (FAB) found 428.1385 [calcd for  $\text{C}_{20}\text{H}_{30}\text{NO}_3\text{S}_3$  ( $\text{M}+\text{H}$ ) $^+$  428.1381].

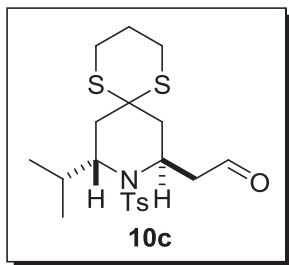

A colorless crystal:  $[\alpha]_D^{23} = -9.10$  ( $c$  0.083,  $\text{CHCl}_3$ );  $^1\text{H}$  NMR (400 MHz,  $\text{CDCl}_3$ )  $\delta$  9.81 (s, 1H), 7.71 (d,  $J = 8.4$  Hz, 2H), 7.30 (d,  $J = 8.4$  Hz, 2H), 4.36–4.43 (m, 1H), 3.57–3.62 (m, 1H), 3.34 (dd,  $J = 18.4, 4.4$  Hz, 1H), 3.24 (dd,  $J = 18.4, 9.6$  Hz, 1H), 2.81–2.95 (m, 2H), 2.54–2.66 (m, 2H), 2.42 (s, 3H), 2.31 (dd,  $J = 15.2, 9.6$  Hz, 2H), 1.99–2.06 (m, 3H), 1.82–1.92 (m, 1H), 0.99 (d,  $J = 6.4$  Hz, 3H), 0.80 (d,  $J = 6.4$  Hz, 3H);  $^{13}\text{C}$  NMR (100 MHz,  $\text{CDCl}_3$ )  $\delta$  198.9, 143.5, 139.1, 129.6, 127.5, 63.2, 48.4, 47.5, 46.7, 40.7, 36.3, 29.6, 26.3, 25.0, 21.6, 20.7; IR (neat) 1724, 1155, 754  $\text{cm}^{-1}$ .

An inseparable mixture (**9d**:**10d** = 15:1):  $[\alpha]_D^{25} = +22.6$  ( $c$  0.1,  $\text{CHCl}_3$ );  $^1\text{H}$  NMR (400 MHz,

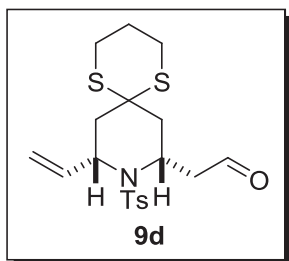

$\text{CDCl}_3$ )  $\delta$  9.78 (s, 1H), 7.73 (d,  $J = 8.4$  Hz, 2H), 7.31 (d,  $J = 8.4$  Hz, 2H), 6.07 (dddd,  $J = 16.8, 10.4, 5.6, 4.8$  Hz, 1H), 5.39 (dd,  $J = 16.8, 2.0$  Hz, 1H), 5.23 (dd,  $J = 10.4, 2.0$  Hz, 1H), 4.44–4.57 (m, 2H), 3.35 (dd,  $J = 18.4, 4.0$  Hz, 1H), 3.21 (dd,  $J = 18.0, 9.6$  Hz, 1H), 2.80–2.93 (m, 2H), 2.62–2.71 (m, 2H), 2.43 (s, 3H), 2.31 (dd,  $J = 14.4, 6.4$  Hz, 1H), 2.18 (dd,  $J = 15.2, 4.8$  Hz, 2H), 1.93–2.00 (m, 1H), 1.80–1.87 (m, 1H), 1.76 (dd,  $J = 15.2, 6.4$  Hz, 2H);  $^{13}\text{C}$  NMR (100 MHz,  $\text{CDCl}_3$ )  $\delta$  200.4, 143.8, 140.2, 136.5, 129.8, 127.4, 116.6, 53.5, 51.5, 47.7, 44.2, 40.5, 37.7, 27.0, 26.9, 24.5; IR (neat) 1721, 1325, 1162, 1094  $\text{cm}^{-1}$ ; HRMS (FAB) found 412.1070 [calcd for  $\text{C}_{19}\text{H}_{26}\text{NO}_3\text{S}_3$  ( $\text{M}+\text{H}$ ) $^+$  412.1069].

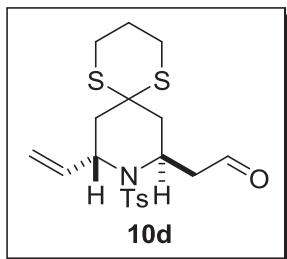

An inseparable mixture (**9d**:**10d** = 1:1):  $^1\text{H}$  NMR (400 MHz,  $\text{CDCl}_3$ )  $\delta$  9.65 (s, 1H), 7.68 (d,  $J$  = 8.4 Hz, 2H), 7.27 (d,  $J$  = 8.4 Hz, 2H), 5.96 (dddd,  $J$  = 16.8, 10.0, 5.2, 4.8 Hz, 1H), 5.25 (d,  $J$  = 10.4 Hz, 1H), 5.12 (d,  $J$  = 10.0 Hz, 1H), 4.58–4.64 (m, 2H), 3.27 (dd,  $J$  = 18.0, 6.4 Hz, 1H), 3.10 (dd,  $J$  = 18.4, 8.0 Hz, 1H), 2.80–2.93 (m, 2H), 2.71–2.79 (m, 2H), 2.41 (s, 3H), 2.22–2.30 (m, 2H), 2.20 (d,  $J$  = 3.2 Hz, 1H), 2.16 (d,  $J$  = 3.2 Hz, 1H), 1.95–2.04 (m, 1H), 1.78–1.88 (m, 1H).

### Preparation of Allyl Alcohol 11-D

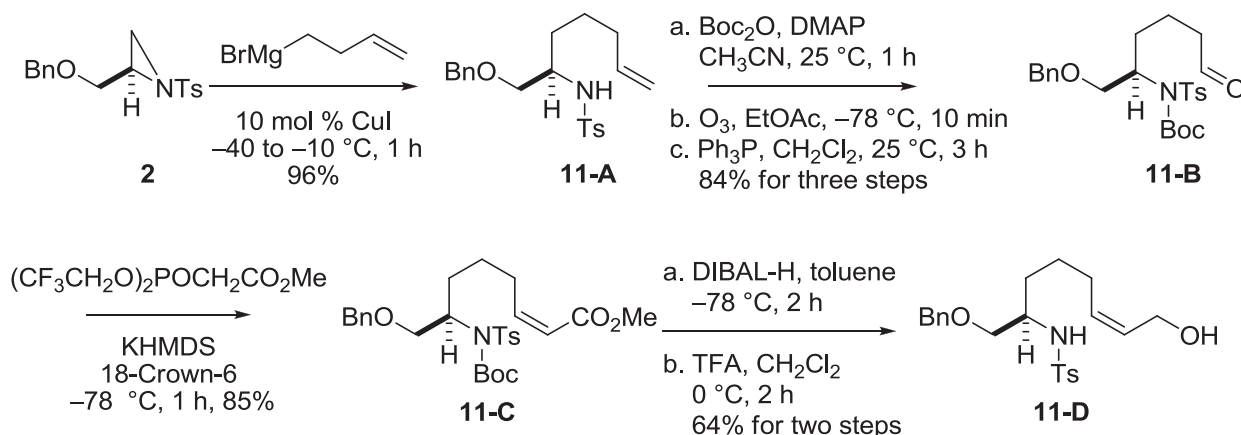

### Preparation of Alkene 11-A

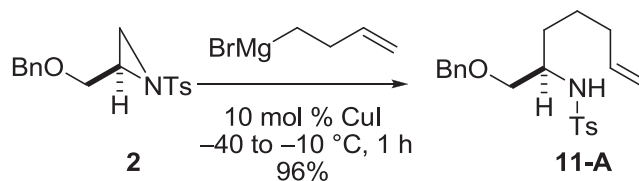

To a cooled ( $-40 \text{ }^\circ\text{C}$ ) solution of 3-butenyl magnesium bromide (0.13 M, 15 mL) in THF (15 mL, 0.13 M) was added CuI (18 mg, 0.095 mmol) and aziridine **2** (300 mg, 0.95 mmol). The resulting mixture was warmed to  $-10 \text{ }^\circ\text{C}$ , stirred at  $-10 \text{ }^\circ\text{C}$  for 1 h, and quenched with 4 mL  $\text{NH}_4\text{Cl}/\text{NH}_4\text{OH}$  (3:1). After stirred at  $25 \text{ }^\circ\text{C}$  for 2 h, the reaction mixture was diluted with EtOAc. The layers were separated, and the aqueous layer was extracted with EtOAc. The combined

organic layers were washed with brine, dried over anhydrous Na<sub>2</sub>SO<sub>4</sub>, and concentrated *in vacuo*. The residue was purified by column chromatography (silica gel, hexanes/EtOAc, 3/1) to afford alkene **11-A** (340 mg, 96%):  $[\alpha]_D^{26} = +18.1$  (*c* 0.68, CHCl<sub>3</sub>); <sup>1</sup>H NMR (400 MHz, CDCl<sub>3</sub>)  $\delta$  7.71 (d, *J* = 8.8 Hz, 2H), 7.17–7.34 (m, 7H), 5.68 (dddd, *J* = 17.2, 10.4, 6.8, 2.8 Hz, 1H), 4.97 (d, *J* = 8.4 Hz, 1H), 4.91 (d, *J* = 17.2 Hz, 1H), 4.90 (d, *J* = 9.2 Hz, 1H), 4.33 (s, 2H), 3.27–3.36 (m, 2H), 3.20 (dd, *J* = 9.6, 4.8 Hz, 1H), 2.39 (s, 3H), 1.93 (q, *J* = 6.8 Hz, 2H), 1.43–1.58 (m, 2H), 1.18–1.39 (m, 2H); <sup>13</sup>C NMR (100 MHz, CDCl<sub>3</sub>)  $\delta$  143.0, 138.2, 138.1, 137.7, 129.5, 128.3, 127.6, 127.5, 126.9, 114.6, 73.0, 71.2, 53.4, 33.2, 31.9, 24.7, 21.4; IR (neat) 1640, 1598, 1453, 1416, 1323, 1157, 1090, 1022 cm<sup>-1</sup>.

### Preparation of Aldehyde **11-B**

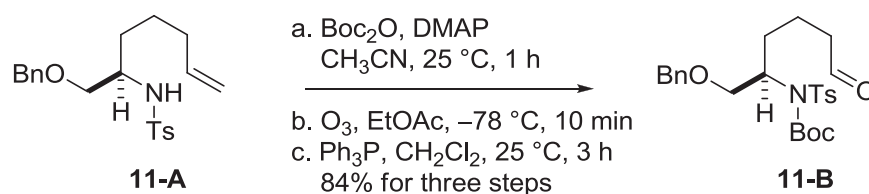

To a stirred solution of alkene **11-A** (297 mg, 0.795 mmol) in CH<sub>3</sub>CN (15 mL, 0.053 M) was added Boc<sub>2</sub>O (208 mg, 0.954 mmol) and DMAP (19 mg, 0.159 mmol) at 25 °C. After stirred at 25 °C for 1 h, the reaction mixture was concentrated and purified by column chromatography (silica gel, hexanes/EtOAc, 10/1) to afford Boc-protected alkene (340 mg, 96%). To a cooled (−78 °C) solution of the known Boc protected alkene (300 mg, 0.634 mmol) in EtOAc (50 mL, 0.013 M) was bubbled O<sub>3</sub> until blue color was persisted (ca. 10 min). After purging the reaction with N<sub>2</sub> gas, EtOAc was removed and the residue was dissolved in CH<sub>2</sub>Cl<sub>2</sub> (10 mL) before Ph<sub>3</sub>P was added. The resulting mixture was stirred at 25 °C for 3 h and concentrated *in vacuo*. The residue was purified by column chromatography (silica gel, hexanes/EtOAc, 4/1) to afford aldehyde **11-B** (260 mg, 84% for three steps): <sup>1</sup>H NMR (400

MHz, CDCl<sub>3</sub>)  $\delta$  9.76 (s, 1H), 7.85 (d,  $J$  = 8.4 Hz, 2H), 7.21–7.30 (m, 5H), 7.05 (d,  $J$  = 8.0 Hz, 2H), 4.75–4.82 (m, 1H), 4.49 (AB,  $J_{AB}$  = 11.6 Hz,  $\Delta\nu_{AB}$  = 45.6 Hz, 2H), 3.97 (t,  $J$  = 9.6 Hz, 1H), 3.58 (dd,  $J$  = 10.0, 5.6 Hz, 1H), 2.44–2.57 (m, 2H), 1.94–2.04 (m, 1H), 1.58–1.87 (m, 3H); <sup>13</sup>C NMR (100 MHz, CDCl<sub>3</sub>)  $\delta$  202.1, 150.5, 143.5, 137.8, 137.6, 128.7, 128.27, 128.25, 127.8, 127.5, 84.1, 73.0, 70.5, 58.1, 43.2, 29.7, 27.8, 21.5, 19.0.

### Preparation of Aldehyde **11-B**

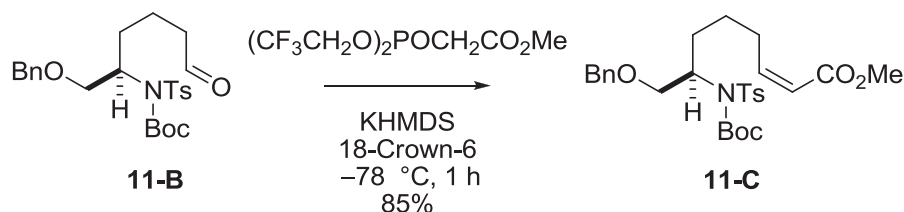

To a cooled ( $-78$  °C) solution of methyl bis(2,2,2-trifluoroethyl)phosphonoacetate (0.23 mL, 1.06 mmol) and 18-crown-6 (1.4 g, 5.3 mmol) in THF (30 mL, 0.035 M) was added KHMDS (0.5 M, 2.1 mL). After stirred at the same temperature for 0.5 h, aldehyde **11-B** (250 mg, 0.53 mmol) was added to the reaction mixture. After stirred for 1 h at  $-78$  °C, the reaction mixture was quenched with saturated aqueous NH<sub>4</sub>Cl and diluted with EtOAc. The layers were separated, and the aqueous layer was extracted with EtOAc. The combined organic layers were washed with brine, dried over anhydrous Na<sub>2</sub>SO<sub>4</sub>, and concentrated *in vacuo*. The residue was purified by column chromatography (silica gel, hexanes/EtOAc, 8/1 to 4/1) to afford enoate **11-C** (236 mg, 85%): <sup>1</sup>H NMR (400 MHz, CDCl<sub>3</sub>)  $\delta$  7.86 (d,  $J$  = 6.4 Hz, 2H), 7.22–7.30 (m, 5H), 7.05 (d,  $J$  = 8.4 Hz, 2H), 6.22 (ddd,  $J$  = 11.2, 7.2, 4.4 Hz, 1H), 5.78 (ddd,  $J$  = 11.2, 2.0, 2.0 Hz, 1H), 4.75–4.83 (m, 1H), 4.49 (AB,  $J_{AB}$  = 11.6 Hz,  $\Delta\nu_{AB}$  = 47.6 Hz, 2H), 3.98 (dd,  $J$  = 9.6, 9.6 Hz, 1H), 3.69 (s, 3H), 3.57 (dd,  $J$  = 10.0, 5.6 Hz, 1H), 2.69–2.75 (m, 2H), 2.35 (s, 3H), 1.93–2.03 (m, 1H), 1.53–1.67 (m, 3H), 1.29 (s, 9H); <sup>13</sup>C NMR (100 MHz, CDCl<sub>3</sub>)  $\delta$  166.7, 150.5, 150.0, 143.4,



137.9, 137.7, 128.7, 128.3, 128.2, 127.8, 127.5, 119.6, 84.0, 72.9, 70.6, 58.4, 50.9, 29.9, 28.6, 27.8, 25.8, 21.5.

### Preparation of Allylic Alcohol **11-D**

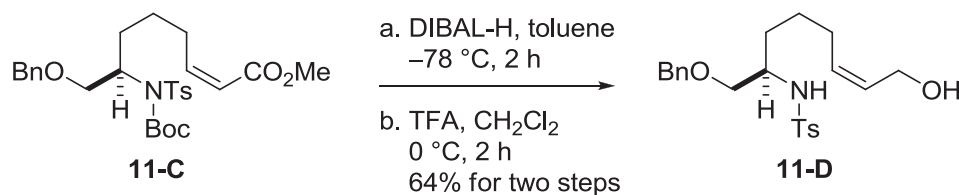

**[DIBAL-H Reduction]** To a cooled (-78 °C) solution of enoate **11-C** (230 mg, 0.433 mmol) in toluene (8 mL, 0.054 M) was added DIBAL-H (1.73 mL, 1.0 M in toluene, 1.732 mmol). After stirred at the same temperature for 2 h, the reaction mixture was quenched with MeOH, and diluted with Et<sub>2</sub>O. The resulting mixture was stirred for 5 h at 25 °C, filtered through a pad of celite and concentrated *in vacuo*. This crude alcohol was employed in the next step without purification. **[Boc-Deprotection]** To the crude Boc-sulfonamide (105 mg, 0.21 mmol) in CH<sub>2</sub>Cl<sub>2</sub> (4.2 mL) was added TFA (0.8 mL) at 0 °C. After stirred at the same temperature for 2 h, the reaction mixture was concentrated *in vacuo* and purified by column chromatography (silica gel, hexanes/EtOAc, 1/1) to afford **11-D** (54 mg, 64% for two steps) as a colorless oil:  $[\alpha]_D^{26} = +8.5$  (*c* 0.20, CHCl<sub>3</sub>); <sup>1</sup>H NMR (400 MHz, CDCl<sub>3</sub>) δ 7.70 (d, *J* = 8.0 Hz, 2H), 7.18–7.35 (m, 7H), 5.58 (ddd, *J* = 12.8, 6.8, 6.0 Hz, 1H), 5.40 (ddd, *J* = 15.2, 10.4, 7.2 Hz, 1H), 5.02 (d, *J* = 8.4 Hz, 1H), 4.32 (s, 2H), 4.13 (d, *J* = 6.8 Hz, 2H), 3.28–3.38 (m, 1H), 3.28 (dd, *J* = 9.2, 4.0 Hz, 1H), 3.16 (dd, *J* = 8.8, 4.4 Hz, 1H), 2.40 (s, 3H), 2.17 (s, 1H), 1.92–2.06 (m, 2H), 1.44–1.58 (m, 2H), 1.21–1.40 (m, 2H); <sup>13</sup>C NMR (100 MHz, CDCl<sub>3</sub>) δ 143.1, 138.0, 137.6, 132.1, 129.5, 128.8, 128.3, 127.7, 127.6, 126.9, 73.1, 71.1, 58.3, 53.3, 31.8, 26.7, 25.3, 21.4; IR (neat) 1598, 1453, 1323, 1157, 1091, 1024 cm<sup>-1</sup>.

### Allylic Oxidation/Aza-Michael Reaction of 11-D

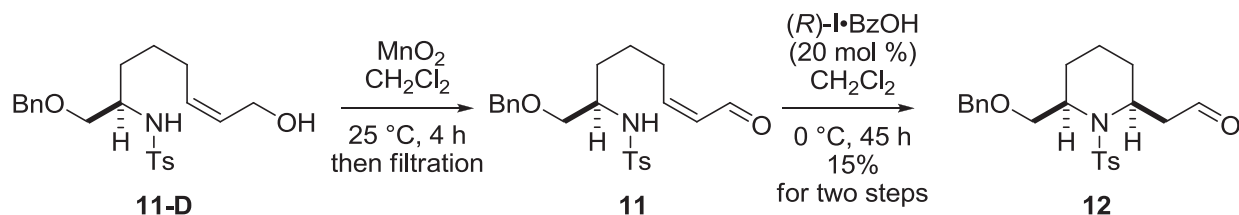

**[Allylic Oxidation]** To a stirred solution of **11-D** (41 mg, 0.102 mmol) in  $\text{CH}_2\text{Cl}_2$  (3.0 mL, 0.0331 M) was added  $\text{MnO}_2$  (196.3 mg, 1.986 mmol) at 25 °C. After stirred for 4 h at the same temperature, the reaction mixture was then filtered through celite and concentrated *in vacuo*. This crude  $\alpha,\beta$ -unsaturated aldehyde **11** (40 mg, 0.0998 mmol) was employed in the next step without purification. **[Aza-Michael Reaction]** To a stirred solution of  $\alpha,\beta$ -unsaturated aldehyde **11** in  $\text{CH}_2\text{Cl}_2$  (4.0 mL, 0.0248 M) was added (*R*)-**I-BzOH** (8.9 mg, 0.0197 mmol) at 0 °C. After stirred for 45 h at the same temperature, the reaction mixture was concentrated and purified by column chromatography (silica gel, hexanes/EtOAc, 3/1) to afford 2,6-*cis*-piperidine **12** as the major diastereomer (6 mg, 15% for two steps, dr = 11:1) as a colorless oil: **[For 11]**  $^1\text{H}$  NMR (400 MHz,  $\text{CDCl}_3$ )  $\delta$  10.01 (d,  $J$  = 8.0 Hz, 1H), 7.69 (d,  $J$  = 8.0 Hz, 2H), 7.19–7.34 (m, 8H), 6.51 (ddd,  $J$  = 11.2, 8.0, 3.2 Hz, 1H), 5.94 (dd,  $J$  = 11.2, 8.0 Hz, 1H), 4.76 (d,  $J$  = 8.8 Hz, 1H), 4.33 (brs, 2H), 3.30–3.39 (m, 1H), 3.26 (dd,  $J$  = 9.2, 3.2 Hz, 1H), 3.14 (dd,  $J$  = 9.6, 4.0 Hz, 1H), 2.51–2.57 (m, 2H), 2.41 (s, 3H); **[For 12]**  $^1\text{H}$  NMR (400 MHz,  $\text{CDCl}_3$ )  $\delta$  9.71(s, 1H), 7.71 (d,  $J$  = 8.4 Hz, 2H), 7.26–7.38 (m, 7H), 4.56 (d,  $J$  = 4.0 Hz, 2H), 4.18–4.25 (m, 1H), 3.61 (d,  $J$  = 8.0 Hz, 1H), 3.59 (d,  $J$  = 5.6 Hz, 1H), 2.76 (dd,  $J$  = 17.2, 5.6 Hz, 1H), 2.64 (ddd,  $J$  = 17.2, 8.8, 1.6 Hz, 1H), 2.42 (s, 3H), 1.80 (d,  $J$  = 12.8 Hz, 2H), 1.17–1.56 (m, 6H).

## Preparation of Allyl Alcohols 3-Ba and 3-Bb

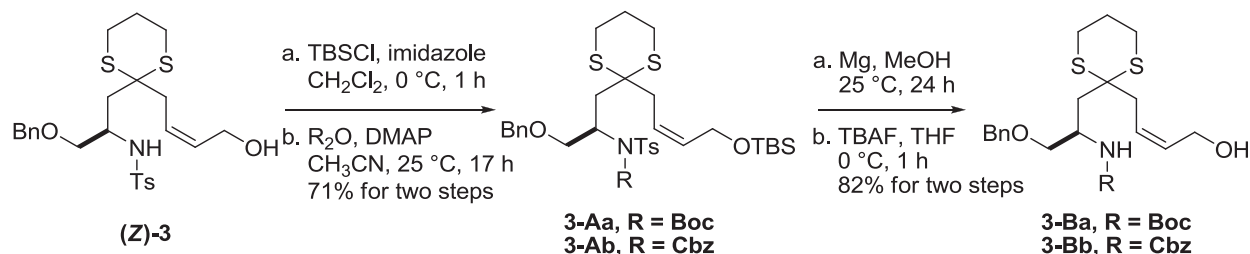

To a stirred solution of sulfonamide **(Z)-3** (200 mg, 0.39 mmol) in  $\text{CH}_2\text{Cl}_2$  (3 mL, 0.13 M) was added TBSCl (66 mg, 0.437 mmol) and imidazole (80 mg, 1.18 mmol) at  $0^\circ\text{C}$ . After stirred at  $0^\circ\text{C}$  for 1 h, the reaction mixture was concentrated and purified by column chromatography (silica gel, hexanes/EtOAc, 10/1) to afford the corresponding TBS-protected allyl alcohol (210 mg, 86%). To a stirred solution of the TBS-protected allyl alcohol (105 mg, 0.17 mmol) in  $\text{CH}_3\text{CN}$  (6 mL, 0.03 M) was added  $\text{Boc}_2\text{O}$  (55 mg, 0.253 mmol) and DMAP (5 mg, 0.04 mmol) at  $25^\circ\text{C}$ . After stirred at  $25^\circ\text{C}$  for 17 h, the reaction mixture was concentrated and purified by column chromatography (silica gel, hexanes/EtOAc, 10/1) to afford **3-Aa** (100 mg, 71% for two steps): [**For 3-Aa**]  $^1\text{H}$  NMR (400 MHz,  $\text{CDCl}_3$ )  $\delta$  7.83 (d,  $J = 8.0$  Hz, 2H), 7.18–7.25 (m, 5H), 7.02 (d,  $J = 7.2$  Hz, 2H), 5.64 (ddd,  $J = 12.0, 6.0, 5.6$  Hz, 1H), 5.55 (ddd,  $J = 12.0, 6.8, 5.6$  Hz, 1H), 5.03 (brs, 1H), 4.44 (AB,  $J_{\text{AB}} = 11.6$  Hz,  $\Delta\nu_{\text{AB}} = 60.8$  Hz, 2H), 4.21 (d,  $J = 6.0$  Hz, 2H), 3.64 (dd,  $J = 9.6, 5.6$  Hz, 1H), 2.87 (d,  $J = 11.2$  Hz, 2H), 2.53–2.79 (m, 4H), 2.23–2.37 (m, 1H), 2.29 (s, 3H), 1.90–1.97 (m, 1H), 1.75–1.84 (m, 1H), 1.22 (s, 9H), 0.82 (s, 9H), 0.00 (s, 6H).

Cbz-protected sulfonamide **3-Ab** was prepared from **(Z)-3** in the same manner in 71% for two steps. [**For 3A-b**]  $^1\text{H}$  NMR (400 MHz,  $\text{CDCl}_3$ )  $\delta$  7.71 (d,  $J = 8.4$  Hz, 2H), 7.17–7.26 (m, 6H), 7.11 (d,  $J = 8.0$  Hz, 2H), 7.05 (d,  $J = 7.2$  Hz, 2H), 6.88 (d,  $J = 7.2$  Hz, 2H), 5.62 (ddd,  $J = 11.6, 5.6, 5.2$  Hz, 1H), 5.50 (ddd,  $J = 12.0, 6.8, 5.6$  Hz, 1H), 4.91–5.05 (m, 1H), 4.48 (d,  $J = 12.0$  Hz,

1H), 4.33 (s, 1H), 4.19 (d,  $J = 5.6$  Hz, 2H), 3.59 (dd,  $J = 9.6, 5.2$  Hz, 1H), 2.54–2.80 (m, 7H), 2.23–2.31 (m, 1H), 2.24 (s, 3H), 1.74–1.90 (m, 2H), 0.83 (s, 9H), 0.00 (s, 6H).

To a stirred solution of Boc-protected sulfonamide **3-Aa** (65mg, 0.09 mmol) in CH<sub>3</sub>OH (3 mL, 0.03M) was added Mg powder (66mg, 2.7 mmol) and NH<sub>4</sub>Cl (49 mg, 0.9 mmol) at room temperature. After stirring at room temperature for 24h, the reaction mixture was diluted with water and then extracted three times with EtOAc. The combined organic layers were washed with brine, dried over anhydrous Na<sub>2</sub>SO<sub>4</sub>, and concentrated *in vacuo*. The residue was purified by column chromatography (silica gel, hexanes/EtOAc, 10/1) to afford the corresponding Boc-protected amine (44 mg, 86%). To a stirred solution of the Boc-protected amine (42mg, 0.074 mmol) in THF (3 mL, 0.025M) was added TBAF (1.0 M in THF, 0.11 mL) at 0 °C. After stirring at 0 °C for 1h, the reaction mixture was quenched with sat. NH<sub>4</sub>Cl and then extracted three times with EtOAc. The combined organic layers were washed with brine, dried over anhydrous Na<sub>2</sub>SO<sub>4</sub>, and concentrated *in vacuo*. The residue was purified by column chromatography (silica gel, hexanes/EtOAc, 2/1) to afford **3-Ba** (32 mg, 82% for two steps): [**For 3-Ba**]  $[\alpha]_D^{21} = +9.0$  ( $c$  0.49, CHCl<sub>3</sub>); <sup>1</sup>H NMR (400 MHz, CDCl<sub>3</sub>)  $\delta$  7.26–7.38 (m, 5H), 5.80 (ddd,  $J = 12.4, 6.8, 5.6$  Hz, 1H), 5.69 (ddd,  $J = 12.4, 7.2, 5.2$  Hz, 1H), 4.95 (d,  $J = 8.0$  Hz, 1H), 4.18 (brs, 2H), 4.00–4.09 (m, 1H), 3.59 (brs, 1H), 3.45 (brs, 1H), 2.68–2.88 (m, 6H), 2.50 (s, 1H), 2.36 (dd,  $J = 14.8, 4.0$  Hz, 1H), 2.02 (dd,  $J = 14.8, 7.2$  Hz, 1H), 1.87–1.99 (m, 2H), 1.43 (s, 9H); <sup>13</sup>C NMR (100 MHz, CDCl<sub>3</sub>)  $\delta$  155.1, 138.0, 131.8, 128.4, 127.7, 126.0, 79.6, 73.1, 72.9, 58.3, 51.4, 47.5, 40.1, 36.0, 28.4, 26.2, 26.1, 24.9. IR (neat) 1695, 1506, 1455, 1366, 1390, 1252, 1170, 1050 cm<sup>-1</sup>; HRMS (FAB) found 454.2080 [calcd for C<sub>23</sub>H<sub>36</sub>NO<sub>4</sub>S<sub>2</sub> (M+H)<sup>+</sup> 454.2080].

Cbz-protected allyl alcohol **3-Bb** was prepared from **3-Ba** in the same manner in 82% for two steps. [**For 3-Bb**]  $[\alpha]_D^{27} = +18.6$  ( $c$  0.87, CHCl<sub>3</sub>); <sup>1</sup>H NMR (400 MHz, CDCl<sub>3</sub>)  $\delta$  7.26–7.35 (m, 9H), 5.78 (ddd,  $J = 12.4, 7.2, 5.2$  Hz, 1H), 5.68 (ddd,  $J = 12.4, 6.4, 5.6$  Hz, 1H), 5.28 (d,  $J = 8.8$

Hz, 1H), 5.10 (br s, 2H), 4.51 (s, 2H), 4.09–4.19 (m, 3H), 3.60 (dd,  $J = 8.8, 2.4$  Hz, 1H), 3.47 (dd,  $J = 8.8, 4.0$  Hz, 1H), 2.72–2.85 (m, 6H), 2.42 (s, 1H), 2.34 (dd,  $J = 15.2, 4.4$  Hz, 1H), 2.08 (dd,  $J = 15.2, 7.6$  Hz, 1H), 1.86–1.99 (m, 2H);  $^{13}\text{C}$  NMR (100 MHz,  $\text{CDCl}_3$ )  $\delta$  155.6, 137.8, 136.4, 131.8, 128.4, 128.3, 128.0, 127.7, 125.9, 73.1, 72.6, 66.7, 58.3, 51.3, 48.2, 40.0, 36.1, 26.2, 26.1, 24.8. IR (neat) 1699, 1520, 1268, 1238, 1052  $\text{cm}^{-1}$ ; HRMS (FAB) found 488.1921 [calcd for  $\text{C}_{26}\text{H}_{34}\text{NO}_4\text{S}_2$  ( $\text{M}+\text{H}$ ) $^+$  488.1924].

### Aza-Michael Reaction with **3-Ba** and **3-Bb**

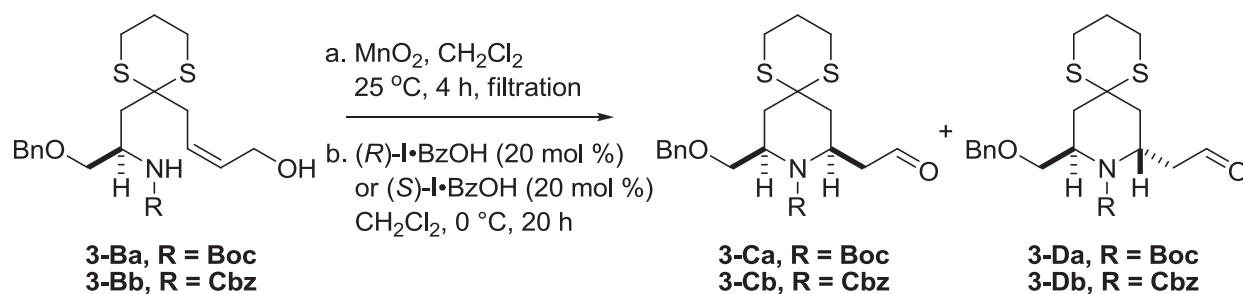

| entry | R   | catalyst               | yield (%) <sup>a</sup> | dr <sup>b</sup> |
|-------|-----|------------------------|------------------------|-----------------|
| 1     | Ts  | ( <i>R</i> )- <b>I</b> | 92                     | 11:1            |
| 2     | Ts  | ( <i>S</i> )- <b>I</b> | 88                     | 1:3             |
| 3     | Boc | ( <i>R</i> )- <b>I</b> | 80                     | 8:1             |
| 4     | Boc | ( <i>S</i> )- <b>I</b> | 70                     | 4:1             |
| 5     | Cbz | ( <i>R</i> )- <b>I</b> | 67                     | 20:1            |
| 6     | Cbz | ( <i>S</i> )- <b>I</b> | 61                     | 2:1             |

<sup>a</sup>Combined yield of **3-C** and **3-D**. <sup>b</sup>Diastereomeric ratio (2,6-*cis*-piperidine:2,6-*trans*-piperidine) determined by integration of the  $^1\text{H}$  NMR spectrum of the crude product.

To a stirred solution of **3-Ba** (10 mg, 0.022 mmol) in  $\text{CH}_2\text{Cl}_2$  (1.0 mL, 0.02 M) was added  $\text{MnO}_2$  (220 mg, 0.55 mmol) at 25 °C. After stirred for 4 h at the same temperature, the reaction mixture was then filtered through celite and concentrated *in vacuo*. To a stirred solution of  $\alpha,\beta$ -unsaturated aldehyde intermediate (9 mg, 0.02 mmol) in  $\text{CH}_2\text{Cl}_2$  (1.0 mL, 0.02 M) was added (*R*)-**I**·BzOH (1.8 mg, 0.004 mmol) at 0 °C. After stirred for 20 h at the same temperature, the reaction mixture was concentrated and purified by column chromatography (silica gel,

hexanes/EtOAc, 3/1) to afford 2,6-*cis*- piperidine **3-Ca** as the major diastereomer (8 mg, 80% for two steps, **3-Ca:3-Da** = 8:1, Entry 3) as a colorless oil: [**For 3-Ca**]  $^1\text{H}$  NMR (400 MHz,  $\text{CDCl}_3$ )  $\delta$  9.70 (t,  $J$  = 1.6 Hz, 1H), 7.27–7.37 (m, 5H), 4.67 (ddd,  $J$  = 14.4, 7.6, 6.4 Hz, 1H), 4.54 (AB,  $J_{\text{AB}}$  = 11.6 Hz,  $\Delta\nu_{\text{AB}}$  = 30.8 Hz, 2H), 4.47 (ddd,  $J$  = 14.0, 7.6, 5.6 Hz, 1H), 3.67 (dd,  $J$  = 9.6, 6.8 Hz, 1H), 3.48 (dd,  $J$  = 9.2, 4.8 Hz, 1H), 2.80–2.94 (m, 4H), 2.73 (dd,  $J$  = 16.4, 5.6 Hz, 1H), 2.56 (dd,  $J$  = 15.6, 7.2 Hz, 1H), 2.34 (dd,  $J$  = 14.4, 8.0 Hz, 1H), 2.22 (dd,  $J$  = 14.8, 5.2 Hz, 1H), 1.90–2.04 (m, 3H), 1.42 (s, 9H); HRMS (FAB) found 452.1924 [calcd for  $\text{C}_{23}\text{H}_{34}\text{NO}_4\text{S}_2$  ( $\text{M}+\text{H}$ ) $^+$  452.1924].

2,6-*cis*-piperidine **3-Cb** was prepared as the major diastereomer from **13-Bb** in the same manner in 67% for two steps (**3-Cb:3-Db** = 20:1, Entry 5): [**For 3-Cb**]  $^1\text{H}$  NMR (400 MHz,  $\text{CDCl}_3$ )  $\delta$  9.66 (t,  $J$  = 1.6 Hz, 1H), 7.27–7.36 (m, 10H), 5.14 (s, 2H), 4.75 (ddd,  $J$  = 14.8, 7.6, 7.2 Hz, 1H), 4.51–4.58 (m, 1H), 4.51 (AB,  $J_{\text{AB}}$  = 12.4 Hz,  $\Delta\nu_{\text{AB}}$  = 30.4 Hz, 2H), 3.66 (dd,  $J$  = 9.6, 6.4 Hz, 1H), 3.48 (dd,  $J$  = 9.6, 5.2 Hz, 1H), 2.72–2.96 (m, 5H), 2.62 (ddd,  $J$  = 14.4, 8.0, 2.0 Hz, 1H), 2.36 (ddd,  $J$  = 14.8, 8.4, 1.6 Hz, 1H), 2.19 (dd,  $J$  = 14.4, 5.6 Hz, 1H), 1.88–2.04 (m, 3H); HRMS (FAB) found 486.1766 [calcd for  $\text{C}_{26}\text{H}_{32}\text{NO}_4\text{S}_2$  ( $\text{M}+\text{H}$ ) $^+$  486.1767].

### Preparation of (*E*)-Enoate **13**

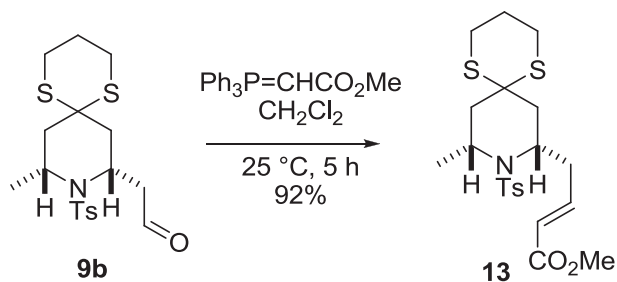

To a solution of aldehyde **9b** (104.8 mg, 0.262 mmol) in  $\text{CH}_2\text{Cl}_2$  (4 mL) was added methyl 2-(triphenylphosphoranylidene)acetate at 25 °C, and the resulting mixture was stirred at the same temperature for 5 h before concentrated *in vacuo*. The residue was purified by column chromatography (silica gel, hexanes/EtOAc, 10/1) to afford (*E*)-enoate **13** (119.5 mg, 92%) as a

colorless oil:  $[\alpha]_D^{25} = +42.6$  ( $c$  1.00,  $\text{CHCl}_3$ );  $^1\text{H}$  NMR (500 MHz,  $\text{CDCl}_3$ )  $\delta$  7.70 (d,  $J = 7.5$  Hz, 2H), 7.27 (d,  $J = 7.5$  Hz, 2H), 6.91 (ddd,  $J = 16.0, 7.5, 7.5$  Hz, 1H), 5.90 (d,  $J = 15.5$  Hz, 1H), 4.03–4.12 (m, 2H), 3.73 (s, 3H), 2.96 (ddd,  $J = 14.5, 8.5, 8.5$  Hz, 1H), 2.68–2.84 (m, 5H), 2.17 (dd,  $J = 15.5, 4.5$  Hz, 1H), 2.05 (dd,  $J = 15.0, 5.0$  Hz, 1H), 1.94 (dd,  $J = 14.5, 6.5$  Hz, 1H), 1.82–1.91 (m, 3H), 1.50 (d,  $J = 7.0$  Hz, 3H);  $^{13}\text{C}$  NMR (125 MHz,  $\text{CDCl}_3$ )  $\delta$  166.4, 145.0, 144.3, 136.7, 129.5, 127.0, 123.7, 51.6, 51.4, 48.0, 44.3, 40.9, 40.3, 37.5, 26.77, 26.69, 24.47, 24.44, 21.4; IR (neat) 2947, 1716, 1158  $\text{cm}^{-1}$ ; HRMS (ESI) found 456.1328 [calcd for  $\text{C}_{21}\text{H}_{30}\text{NO}_4\text{S}_3$  ( $\text{M}+\text{H}$ ) $^+$  456.1331].

### Preparation of Ester 14

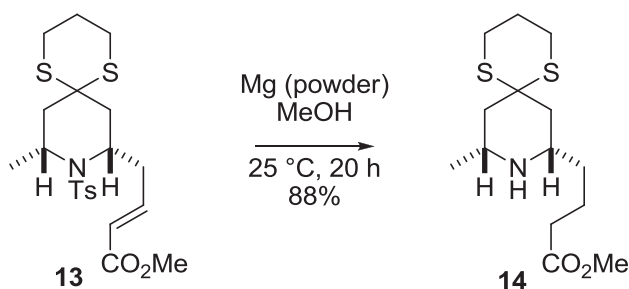

To a solution of (*E*)-enoate **13** (102.0 mg, 0.224 mmol) in anhydrous MeOH (4 mL) was added Mg powder (272.0 mg, 11.2 mmol) at 25 °C. After stirred at the same temperature for 20 h, the reaction mixture was diluted with diethyl ether and saturated aqueous  $\text{NaHCO}_3$ . The resulting cloudy mixture was stirred vigorously for 1 h, filtered through a pad of Celite, concentrated *in vacuo*, and partitioned between  $\text{CH}_2\text{Cl}_2$  and  $\text{H}_2\text{O}$ . The layers were separated, and the aqueous layer was extracted three times with  $\text{CH}_2\text{Cl}_2$ . The combined organic layers were dried over anhydrous  $\text{Na}_2\text{SO}_4$  and concentrated *in vacuo*. The residue was purified by column chromatography on silica gel ( $\text{CH}_2\text{Cl}_2/\text{MeOH}$ , 10/1 to 5:1) to give ester **14** as a colorless oil (60.0 mg, 88%):  $[\alpha]_D^{28} = +31.5$  ( $c$  0.21,  $\text{CHCl}_3$ );  $^1\text{H}$  NMR (400 MHz,  $\text{CDCl}_3$ )  $\delta$  3.64 (s, 3H), 3.11 (dddd,  $J = 12.8, 6.8, 6.8, 6.8, 2.8$  Hz, 1H), 2.99 (dddd,  $J = 13.2, 6.8, 6.8, 2.4$  Hz, 1H), 2.86

(dd,  $J = 6.4, 4.8$  Hz, 2H), 2.73 (dd,  $J = 6.0, 6.0$  Hz, 2H), 2.29 (dd,  $J = 7.6, 7.6$  Hz, 2H), 2.20–2.29 (m, 2H), 1.91–1.99 (m, 2H), 1.62–1.71 (m, 2H), 1.34–1.43 (m, 4H), 1.06 (d,  $J = 6.4$  Hz, 3H);  $^{13}\text{C}$  NMR (125 MHz,  $\text{CDCl}_3$ )  $\delta$  173.8, 51.5, 48.8, 47.3, 45.5, 43.4, 35.7, 33.9, 26.00, 25.86, 25.63, 22.0, 21.2; IR (neat) 2930, 1730  $\text{cm}^{-1}$ ; HRMS (ESI) found 304.1394 [calcd for  $\text{C}_{14}\text{H}_{26}\text{NO}_2\text{S}_2$  ( $\text{M}+\text{H}$ ) $^+$  304.1399].

### Preparation of Quinolizidine 15

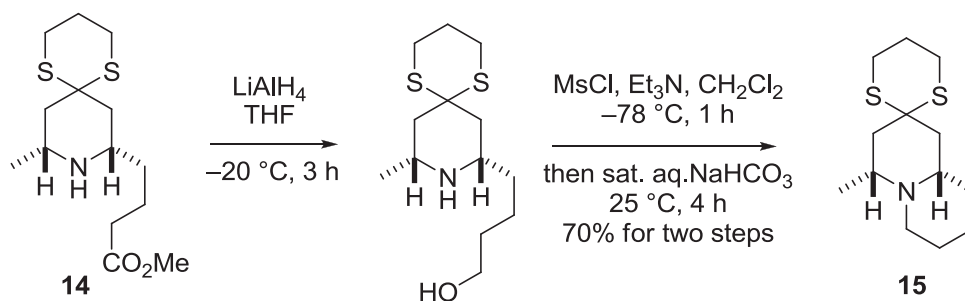

**[LiAlH<sub>4</sub>-Reduction]** To a cooled ( $-20\text{ }^\circ\text{C}$ ) solution of ester **14** (60.0 mg, 0.198 mmol) in anhydrous THF (6 mL) was added  $\text{LiAlH}_4$  (0.2 mL, 2.0 M in THF, 0.4 mmol). After stirred at the same temperature for 3 h, the reaction mixture was quenched with MeOH and diluted with THF (20 mL) and saturated aqueous  $\text{NaHCO}_3$ . The resulting cloudy mixture was stirred vigorously for 2 h, filtered through a pad of Celite, and concentrated *in vacuo* to afford crude alcohol, which was employed in next step without further purification. **[Cyclization]** To a cooled ( $-78\text{ }^\circ\text{C}$ ) solution of crude alcohol in  $\text{CH}_2\text{Cl}_2$  (10 mL) were added  $\text{Et}_3\text{N}$  (0.14 mL, 0.99 mmol) and  $\text{MsCl}$  (2.38 mL, 0.1 M in  $\text{CH}_2\text{Cl}_2$ , 0.24 mmol). The reaction mixture was allowed to warm to  $-20\text{ }^\circ\text{C}$  for 1 h and quenched with saturated aqueous  $\text{NaHCO}_3$ . The resulting mixture was allowed to warm to  $25\text{ }^\circ\text{C}$  over 4 h with continuous stirring. The layers were separated, and the aqueous layer was extracted with  $\text{CH}_2\text{Cl}_2$ . The combined organic layers were washed with brine, dried over anhydrous  $\text{Na}_2\text{SO}_4$ , and concentrated *in vacuo*. The residue was purified by column chromatography on silica gel (EtOAc only) to give quinolizidine **15** as a colorless oil (35.4 mg,



70% for two steps):  $[\alpha]_{\text{D}}^{25} = -21.4$  (*c* 0.57,  $\text{CHCl}_3$ );  $^1\text{H}$  NMR (500 MHz,  $\text{CDCl}_3$ )  $\delta$  3.22 (br d,  $J = 11.5$  Hz, 1H), 2.83–2.87 (m, 2H), 2.72–2.75 (m, 2H), 2.49–2.53 (m, 1H), 2.32 (dd,  $J = 9.5, 9.5$  Hz, 2H), 2.19 (ddd,  $J = 14.0, 2.0, 2.0$  Hz, 1H), 2.15 (ddd,  $J = 14.5, 3.0, 3.0$  Hz, 1H), 1.93–1.99 (m, 2H), 1.64–1.83 (m, 5H), 1.50–1.57 (m, 2H), 1.22–1.34 (m, 2H), 1.09 (d,  $J = 5.5$  Hz, 3H);  $^{13}\text{C}$  NMR (125 MHz,  $\text{CDCl}_3$ )  $\delta$  57.6, 53.8, 51.1, 48.2, 46.1, 45.0, 33.1, 26.21, 26.04, 25.97, 25.69, 24.3, 20.0; IR (neat) 2930, 1423  $\text{cm}^{-1}$ ; HRMS (ESI) found 258.1347 [calcd for  $\text{C}_{13}\text{H}_{24}\text{NS}_2$  ( $\text{M}+\text{H}$ ) $^+$  258.1344].

### Completion of Synthesis (–)-Epimyrtine 16

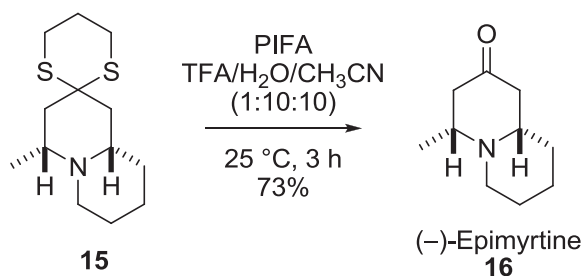

To a solution of quinolizidine **15** (35.4 mg, 0.137 mmol) in TFA/ $\text{H}_2\text{O}$ / $\text{CH}_3\text{CN}$  (1:10:10, total 2.1 mL) was added [bis(trifluoroacetoxy)iodo]benzene (PIFA) (178.3 mg, 0.411 mmol) at 25 °C. After stirred at the same temperature for 3 h, the reaction mixture was quenched with saturated aqueous  $\text{NaHCO}_3$ . The layers were separated, and the aqueous layer was extracted with  $\text{CH}_2\text{Cl}_2$ . The combined organic layers were washed with brine, dried over anhydrous  $\text{Na}_2\text{SO}_4$ , and concentrated *in vacuo*. The residue was purified by column chromatography on silica gel (EtOAc only) to give (–)-epimyrtine **16** as a colorless oil (16.8 mg, 73%):  $[\alpha]_{\text{D}}^{25} = -17.8$  (*c* 0.18,  $\text{CHCl}_3$ );  $^1\text{H}$  NMR (500 MHz,  $\text{CDCl}_3$ )  $\delta$  3.32 (br d,  $J = 11.5$  Hz, 1H), 2.33–2.44 (m, 3H), 2.22–2.29 (m, 2H), 2.17 (dd,  $J = 11.0, 11.0$  Hz, 1H), 1.82 (ddd,  $J = 11.0, 11.0, 2.5$  Hz, 1H), 1.69–1.77 (m, 2H), 1.55–1.68 (m, 2H), 1.36–1.45 (m, 1H), 1.21–1.31 (m, 1H), 1.19 (d,  $J = 6.0$  Hz, 3H);  $^{13}\text{C}$  NMR

(125 MHz, CDCl<sub>3</sub>)  $\delta$  208.4, 62.0, 59.3, 51.0, 49.7, 48.6, 34.0, 25.8, 23.9, 20.6; IR (neat) 2930, 1716 cm<sup>-1</sup>; HRMS (ESI) found 168.1378 [calcd for C<sub>10</sub>H<sub>18</sub>NO (M+H)<sup>+</sup> 168.1382].

### Preparation of (Z)-Enoate **17**

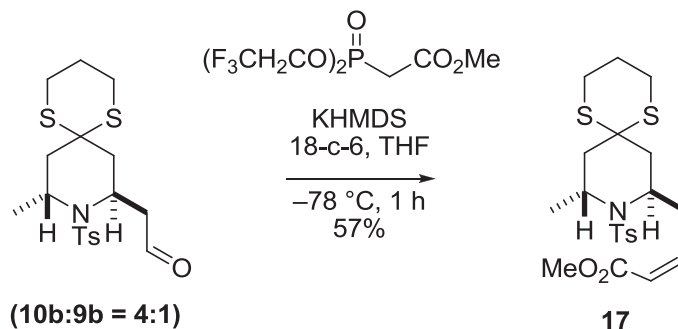

To a cooled ( $-78\text{ }^\circ\text{C}$ ) solution of methyl 2-(bis(2,2,2-trifluoroethoxy)phosphoryl)acetate (0.15 mL, 0.702 mmol) and 18-Crown-6 (264.3 mg, 1.05 mmol) in THF (10 mL, 0.19 M) was added KHMDS (0.7 mL, 1.0 M in THF, 0.7 mmol). The resulting mixture was stirred at the same temperature for 30 min. A mixture of aldehydes **10b** and **9b** (4:1, 140.3 mg) was added, and the resulting mixture was stirred at the same temperature for 1 h before quenched with saturated aqueous NH<sub>4</sub>Cl and diluted with diethyl ether. The layers were separated, and the aqueous layer was extracted with diethyl ether. The combined organic layers were washed with brine, dried over anhydrous Na<sub>2</sub>SO<sub>4</sub>, and concentrated *in vacuo*. The residue was purified by column chromatography on silica gel (hexane/ EtOAc, 1/1) to give (Z)-enoate ester **17** as a colorless oil (90.5 mg, 57%):  $[\alpha]_{\text{D}}^{25} = -25.3$  (*c* 1.00, CHCl<sub>3</sub>); <sup>1</sup>H NMR (500 MHz, CDCl<sub>3</sub>)  $\delta$  7.69 (d, *J* = 8.0 Hz, 2H), 7.24 (d, *J* = 7.5 Hz, 2H), 6.20 (ddd, *J* = 11.0, 7.5, 7.5 Hz, 1H), 5.82 (dd, *J* = 11.0, 1.0 Hz, 1H), 4.43–4.49 (m, 1H), 3.95–4.01 (m, 1H), 3.68 (s, 3H), 3.58 (ddd, *J* = 15.5, 9.0, 9.0 Hz, 1H), 3.02 (ddd, *J* = 16.0, 7.0, 7.0 Hz, 1H), 2.72–2.88 (m, 4H), 2.23 (dd, *J* = 15.0, 3.5 Hz, 1H), 2.16 (dd, *J* = 14.5, 6.0 Hz, 1H), 2.11 (d, *J* = 14.0 Hz, 1H), 1.91–1.99 (m, 3H), 1.34 (d, *J* = 7.5 Hz, 3H); <sup>13</sup>C NMR (125 MHz, CDCl<sub>3</sub>)  $\delta$  166.4, 146.5, 142.9, 129.4, 127.0, 121.0, 54.6, 51.1,

48.1, 47.8, 43.2, 39.9, 32.6, 26.39, 26.26, 25.1, 21.4, 19.7; IR (neat) 1716, 1147  $\text{cm}^{-1}$ ; HRMS (ESI) found 456.1333 [calcd for  $\text{C}_{21}\text{H}_{30}\text{NO}_4\text{S}_3$  ( $\text{M}+\text{H}$ ) $^+$  456.1331].

### Preparation of Ester 17-A

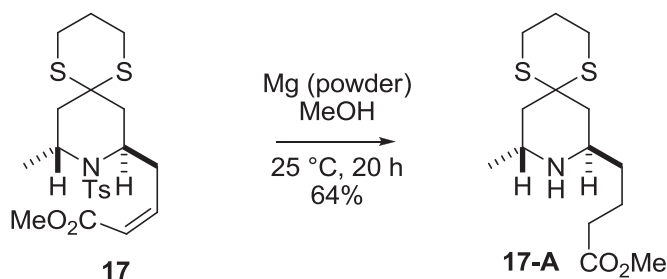

To a solution of (*E*)-enoate **17** (70.1 mg, 0.154 mmol) in anhydrous MeOH (4 mL, 0.044 M) was added Mg powder (50 mesh, 187.0 mg, 7.7 mmol). After stirred at room temperature for 20 h, the reaction mixture was diluted with diethyl ether (10 mL) and saturated aqueous  $\text{NaHCO}_3$ . The layers were separated, and the aqueous layer was extracted with diethyl ether. The combined organic layers were washed with brine, dried over anhydrous  $\text{Na}_2\text{SO}_4$ , and concentrated *in vacuo*. The residue was purified by column chromatography on silica gel (hexane/ EtOAc, 1/1) to give ester **17-A** as a colorless oil (30.0 mg, 64%):  $[\alpha]_{\text{D}}^{28} = +11.5$  (*c* 0.47,  $\text{CHCl}_3$ );  $^1\text{H}$  NMR (400 MHz,  $\text{CDCl}_3$ )  $\delta$  3.65 (s, 3H), 3.24–3.32 (m, 1H), 3.11–3.14 (m, 1H), 2.79–2.89 (m, 4H), 1.91–1.98 (m, 2H), 1.78 (dd,  $J = 14.0, 7.5$  Hz, 1H), 1.62–1.72 (m, 4H), 1.23 (d,  $J = 7.0$  Hz, 3H);  $^{13}\text{C}$  NMR (125 MHz,  $\text{CDCl}_3$ )  $\delta$  173.8, 51.5, 49.8, 47.7, 44.4, 44.1, 41.0, 34.3, 33.8, 26.43, 26.42, 25.3, 22.1, 21.6; IR (neat) 2930, 1732, 1158  $\text{cm}^{-1}$ ; HRMS (ESI) found 304.1395 [calcd for  $\text{C}_{14}\text{H}_{26}\text{NO}_2\text{S}_2$  ( $\text{M}+\text{H}$ ) $^+$  304.1399].

## Preparation of Quinolizidine 17-B

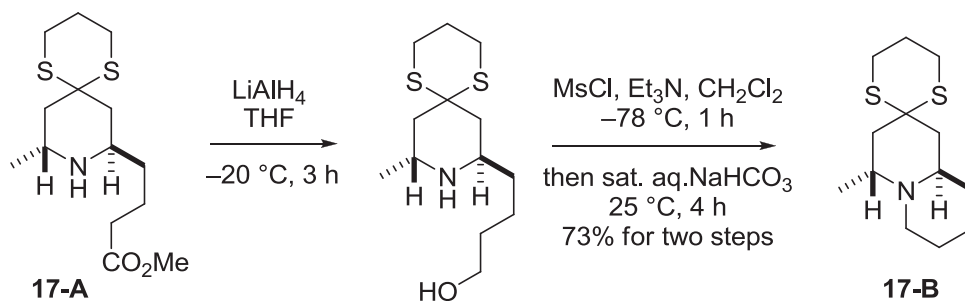

**[LiAlH<sub>4</sub>-Reduction]** To a cooled (–20 °C) solution of ester **17-A** (38.4 mg, 0.127 mmol) in anhydrous THF (5 mL) was added LiAlH<sub>4</sub> (0.51 mL, 2.0 M in THF, 1.02 mmol). After stirred at the same temperature for 3 h, the reaction mixture was quenched with MeOH and diluted with THF (10 mL) and saturated aqueous NaHCO<sub>3</sub>. The cloudy mixture was stirred vigorously for 2 h, filtered through a pad of Celite, and concentrated *in vacuo* to afford crude amino alcohol, which was employed in next step without further purification. **[Cyclization]** To a cooled (–20 °C) solution of crude alcohol in CH<sub>2</sub>Cl<sub>2</sub> (5 mL) were added Et<sub>3</sub>N (0.07 mL, 0.50 mmol) and MsCl (1.40 mL, 0.1 M in CH<sub>2</sub>Cl<sub>2</sub>, 0.140 mmol). After stirred at the same temperature for 1 h, the reaction mixture was quenched saturated aqueous NaHCO<sub>3</sub>. The resulting mixture was allowed to warm to 25 °C over 4 h with continuous stirring. The layers were separated, and the aqueous layer was extracted with CH<sub>2</sub>Cl<sub>2</sub>. The combined organic layers were washed with brine, dried over anhydrous Na<sub>2</sub>SO<sub>4</sub>, and concentrated *in vacuo*. The residue was purified by column chromatography on silica gel (EtOAc only) to give quinolizidine **17-B** as a colorless oil (23.9 mg, 73%):  $[\alpha]_D^{25} = +19.3$  (*c* 0.41, CHCl<sub>3</sub>); <sup>1</sup>H NMR (500 MHz, CDCl<sub>3</sub>) δ 3.23 (dddd, *J* = 7.5, 7.5, 7.5, 2.5 Hz, 1H), 2.96 (ddd, *J* = 17.5, 8.5, 5.0 Hz, 1H), 2.78–2.88 (m, 2H), 2.68–2.74 (m, 3H), 2.48 (ddd, *J* = 11.5, 11.5, 3.5 Hz, 1H), 2.33 (ddd, *J* = 13.5, 2.5, 2.5 Hz, 1H), 2.28 (dd, *J* = 14.0, 5.5 Hz, 1H), 2.20 (ddd, *J* = 14.0, 2.5, 2.5 Hz, 1H), 1.87–2.02 (m, 3H), 1.76 (dd, *J* = 14.0, 10.5 Hz, 1H), 1.72 (br d, *J* = 13.0 Hz, 1H), 1.56–1.63 (m, 3H), 1.21–1.41 (m, 2H), 1.27 (d, *J* =

7.5 Hz, 3H);  $^{13}\text{C}$  NMR (125 MHz,  $\text{CDCl}_3$ )  $\delta$  53.9, 51.3, 50.2, 47.4, 45.0, 43.3, 32.7, 26.54, 26.35, 25.4, 24.1, 14.6; IR (neat) 2928, 1436, 1422, 1309, 1272, 1123  $\text{cm}^{-1}$ ; HRMS (ESI) found 258.1345 [calcd for  $\text{C}_{13}\text{H}_{24}\text{NS}^2$  ( $\text{M}+\text{H}$ ) $^+$  258.1344].

### Completion of Synthesis (+)-Myrtine **18**

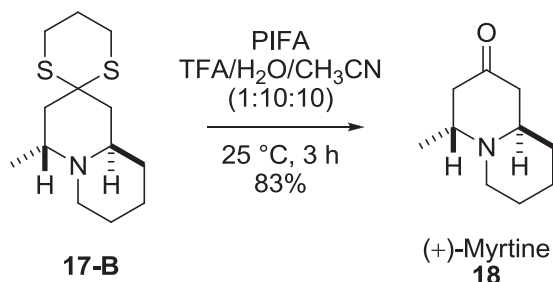

To a solution of quinolizidine **17-B** (23.9 mg, 0.093mmol) in TFA/ $\text{H}_2\text{O}$ / $\text{CH}_3\text{CN}$  (1:10:10, total 2.1 mL) was added [bis(trifluoroacetoxy)iodo]benzene (PIFA, 120.8 mg, 0.278 mmol) at 25  $^\circ\text{C}$ . After stirred at the same temperature for 3 h, the reaction mixture was quenched with saturated aqueous  $\text{NaHCO}_3$ . The layers were separated, and the aqueous layer was extracted with  $\text{CH}_2\text{Cl}_2$ . The combined organic layers were washed with brine, dried over anhydrous  $\text{Na}_2\text{SO}_4$ , and concentrated *in vacuo*. The residue was purified by column chromatography on silica gel (EtOAc only) to give (+)-myrtine **18** as a colorless oil (12.8 mg, 83%):  $[\alpha]_D^{25} = +14.1$  (*c* 0.11,  $\text{CHCl}_3$ );  $^1\text{H}$  NMR (400 MHz,  $\text{CDCl}_3$ )  $\delta$  3.93 (ddddd,  $J = 6.5, 6.5, 6.5, 6.5, 2.0$  Hz, 1H), 2.85 (dd,  $J = 14.0, 6.5$  Hz, 1H), 2.79 (br d,  $J = 11.0$  Hz, 1H), 2.66 (dddd,  $J = 10.0, 10.0, 5.0, 3.0$  Hz, 1H), 2.48 (ddd,  $J = 11.0, 11.0, 2.5$  Hz, 1H), 2.23–2.27 (m, 2H), 2.19 (ddd,  $J = 13.5, 2.0, 2.0$  Hz, 1H), 1.57–1.73 (m, 4H), 1.14–1.36 (m, 3H), 0.97 (d,  $J = 7.0$  Hz, 3H);  $^{13}\text{C}$  NMR (125 MHz,  $\text{CDCl}_3$ )  $\delta$  209.5, 57.0, 53.5, 51.4, 48.6, 48.0, 34.1, 25.7, 23.4, 11.1; IR (neat) 2930, 1716, 1335, 1289, 1279, 1173, 1114  $\text{cm}^{-1}$ ; HRMS (ESI) found 168.1380 [calcd for  $\text{C}_{10}\text{H}_{18}\text{NO}$  ( $\text{M}+\text{H}$ ) $^+$  168.1382].

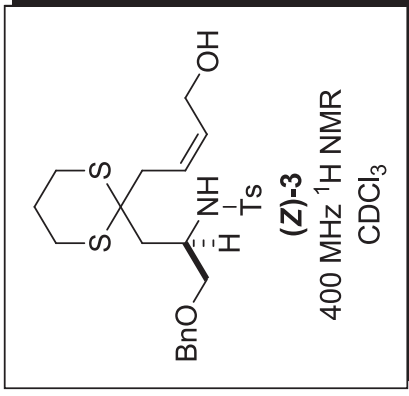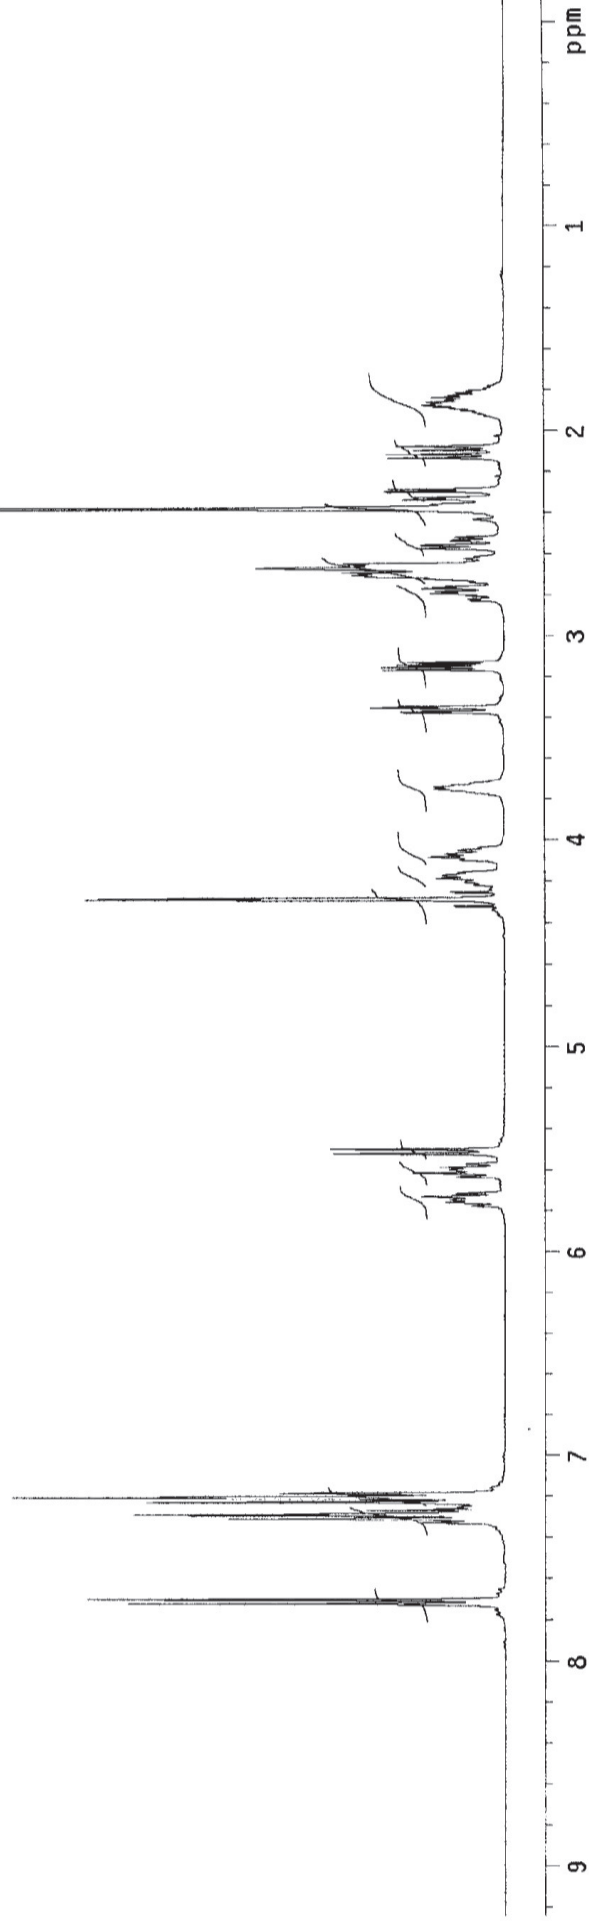

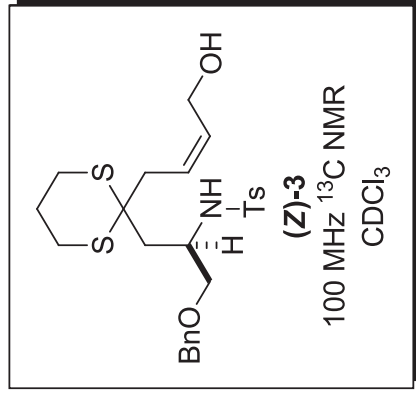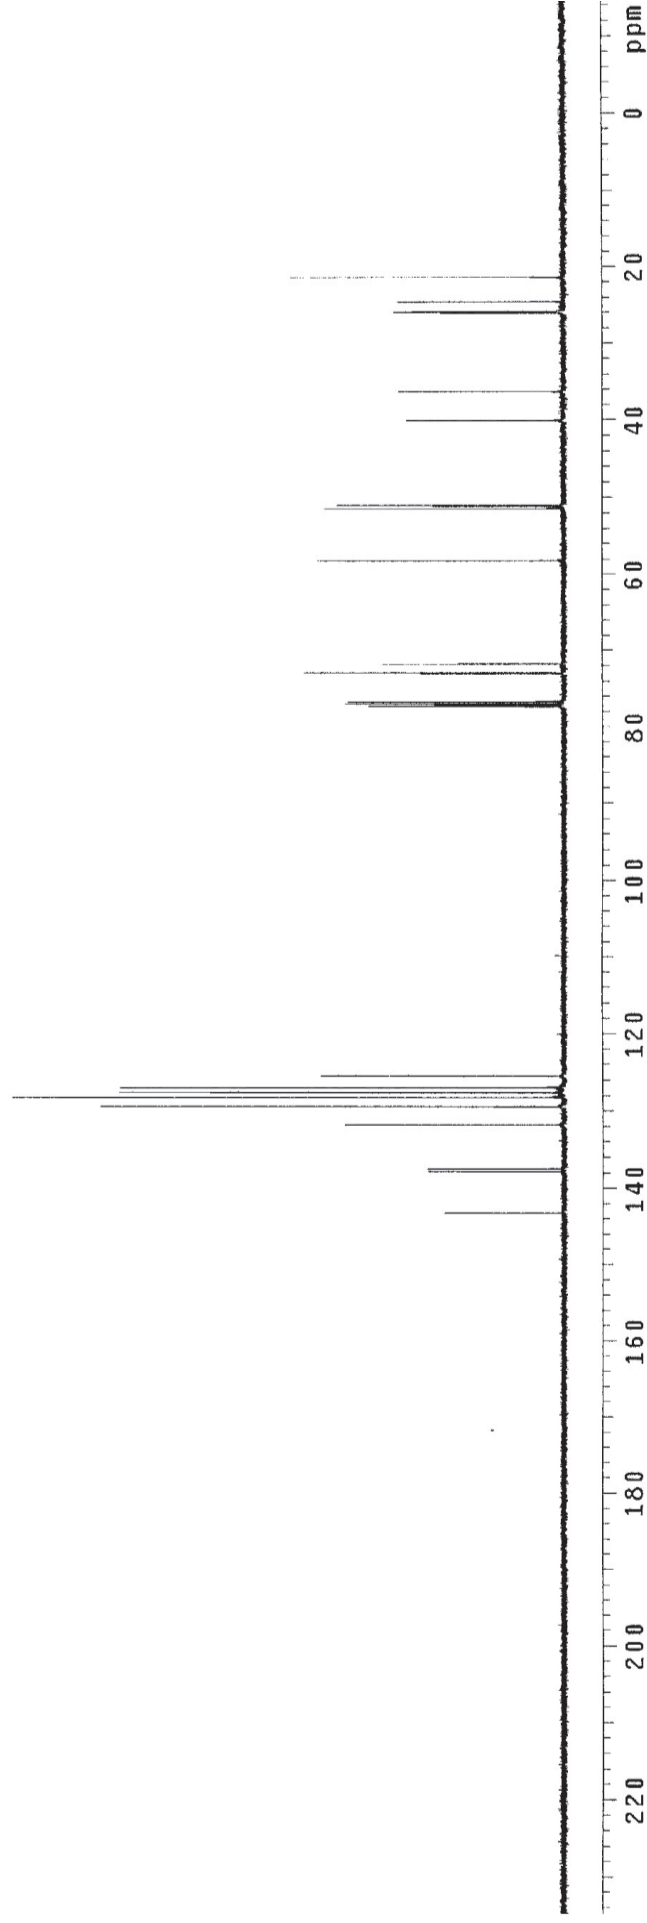

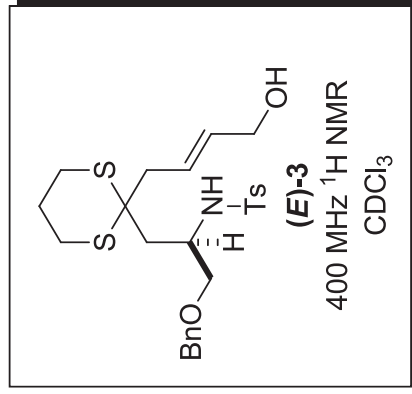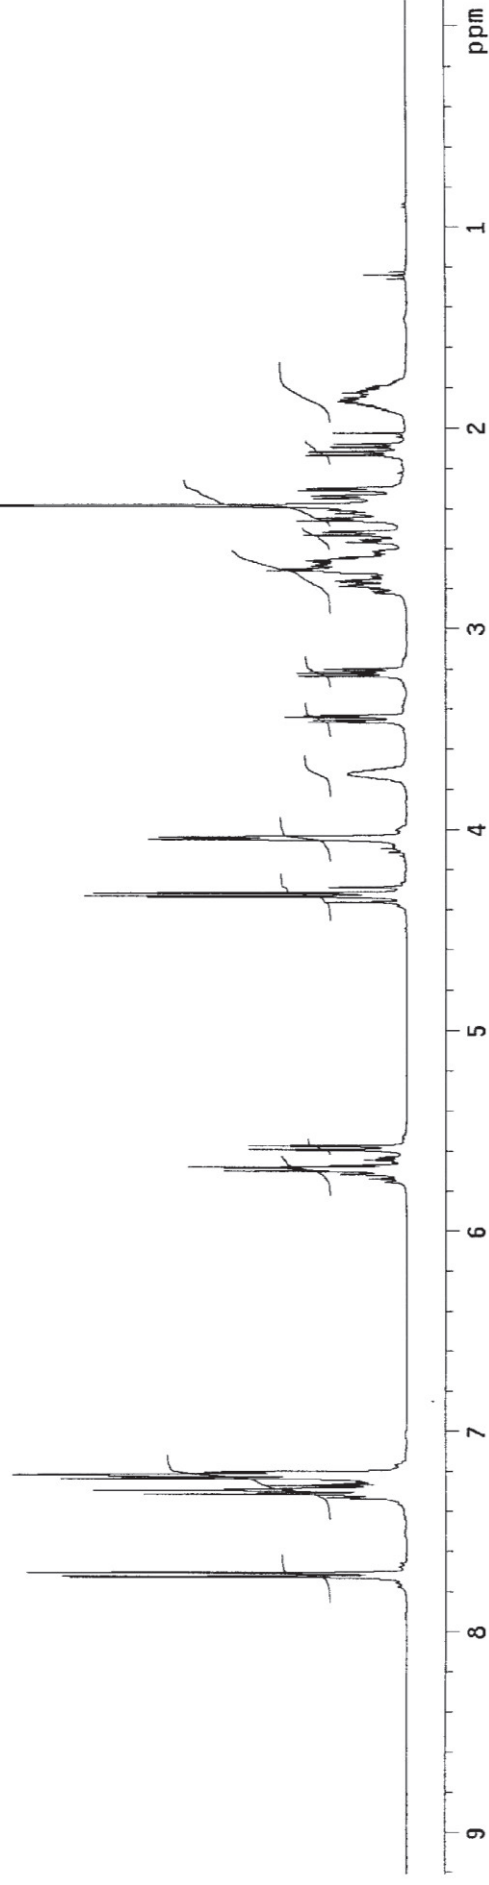



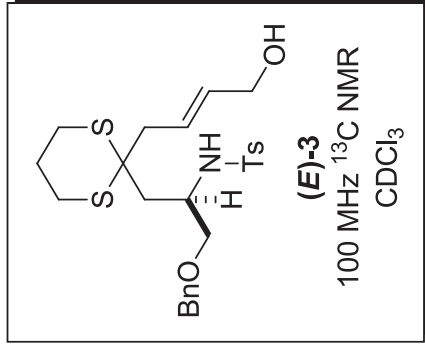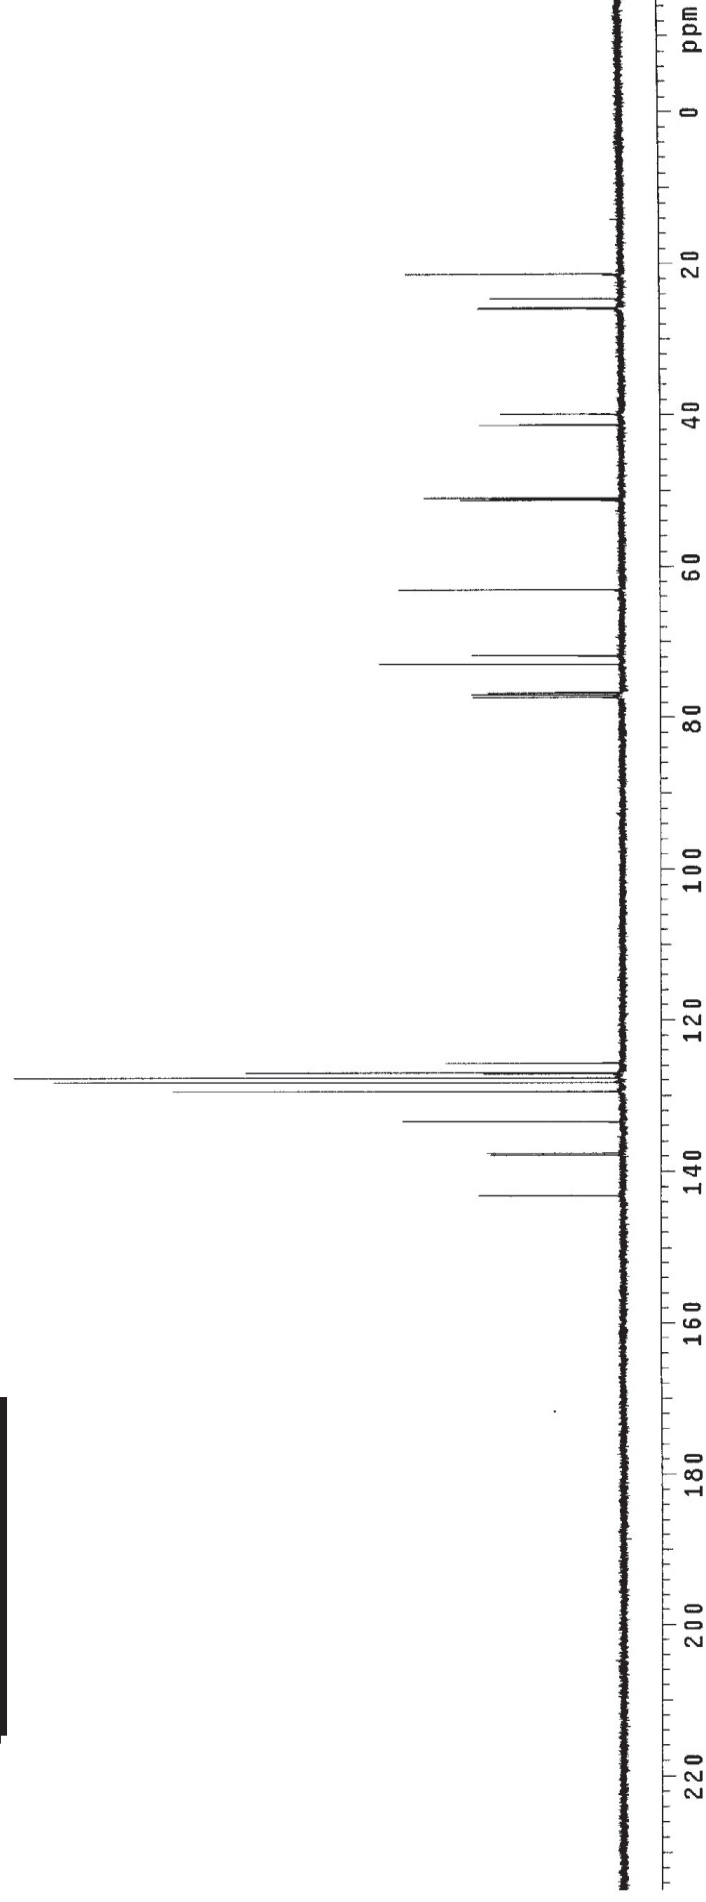

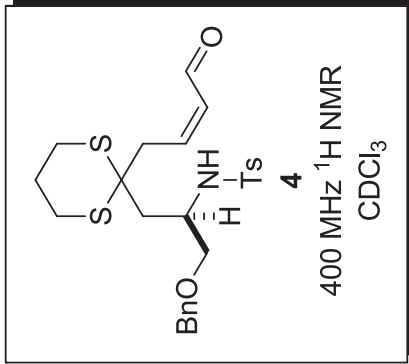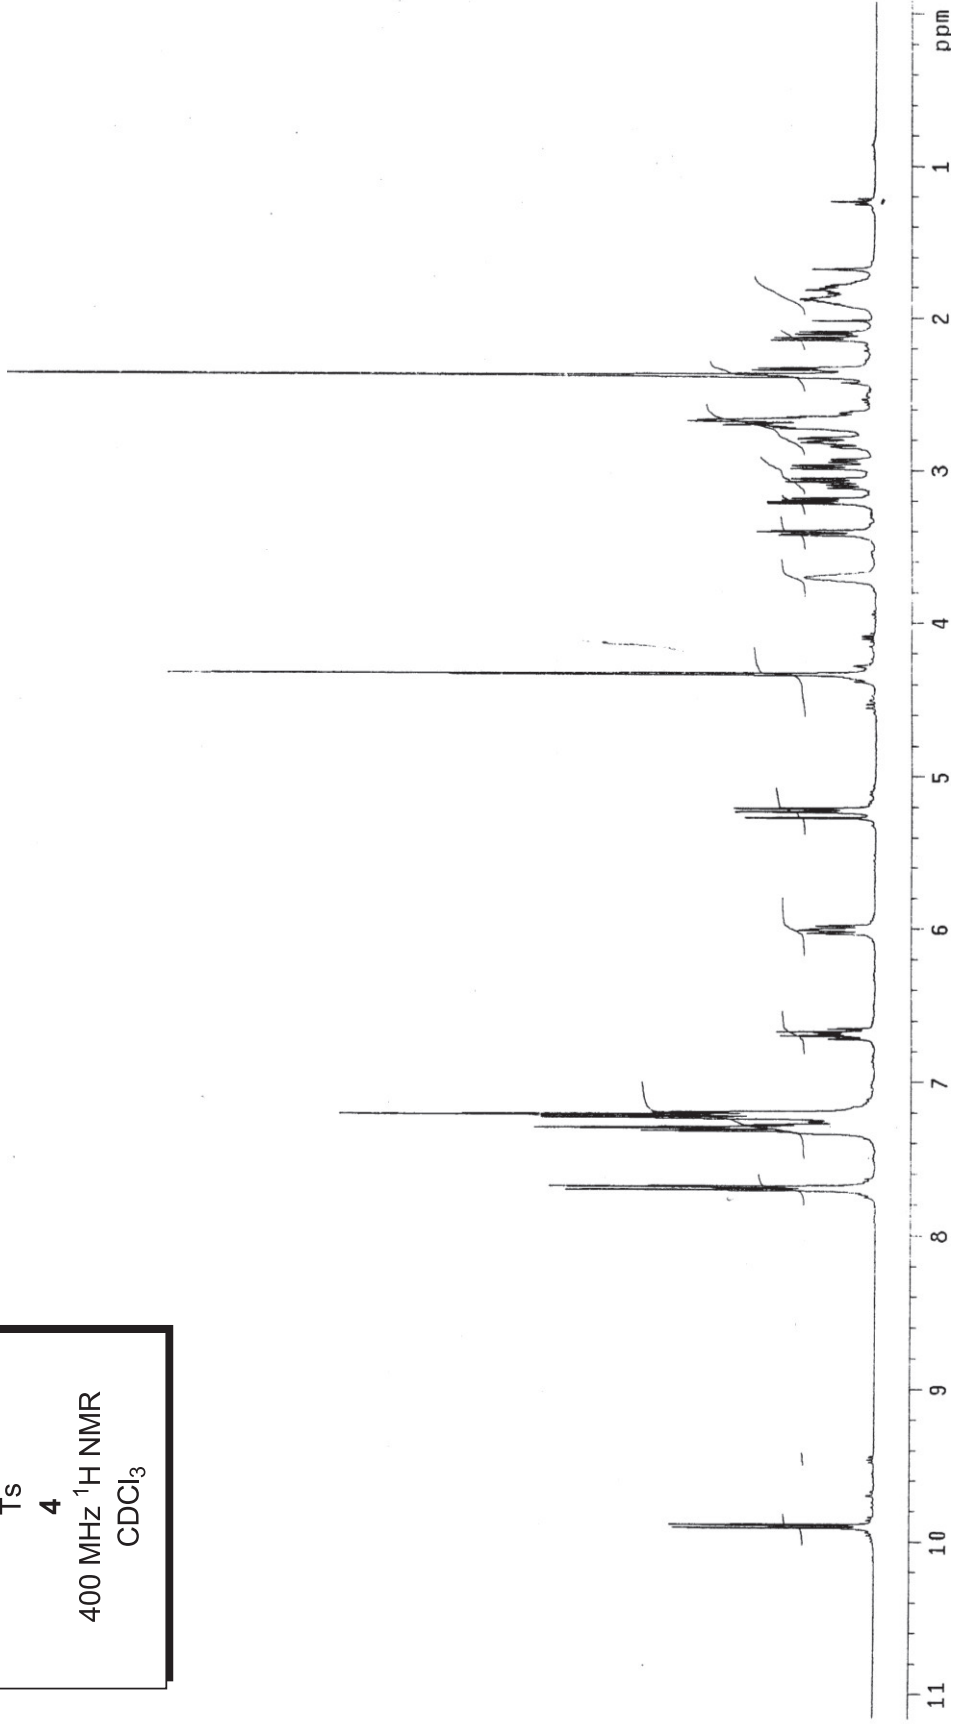

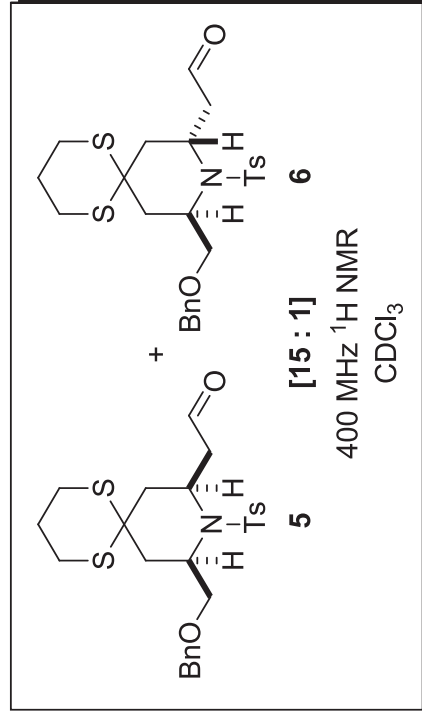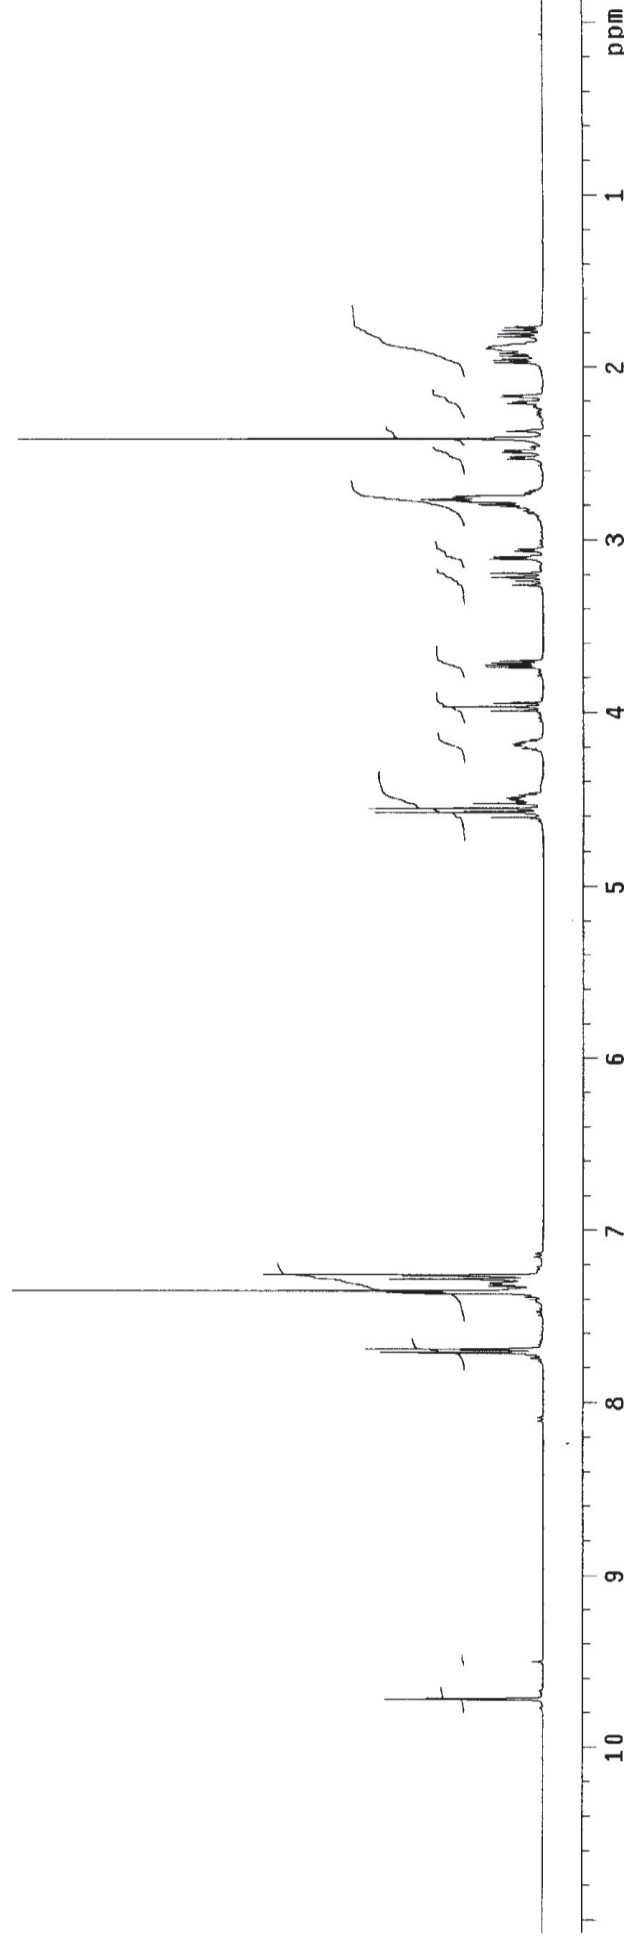

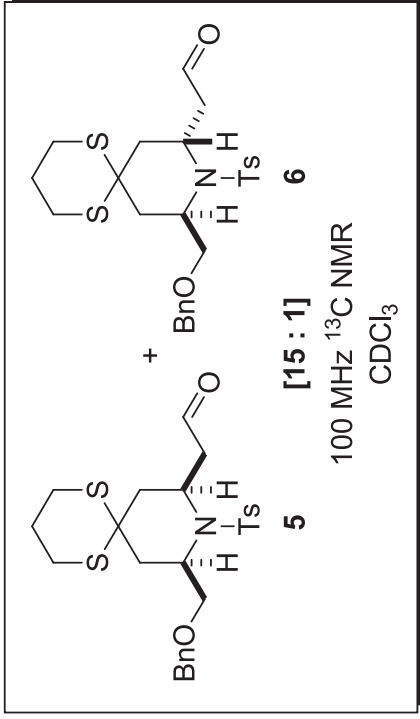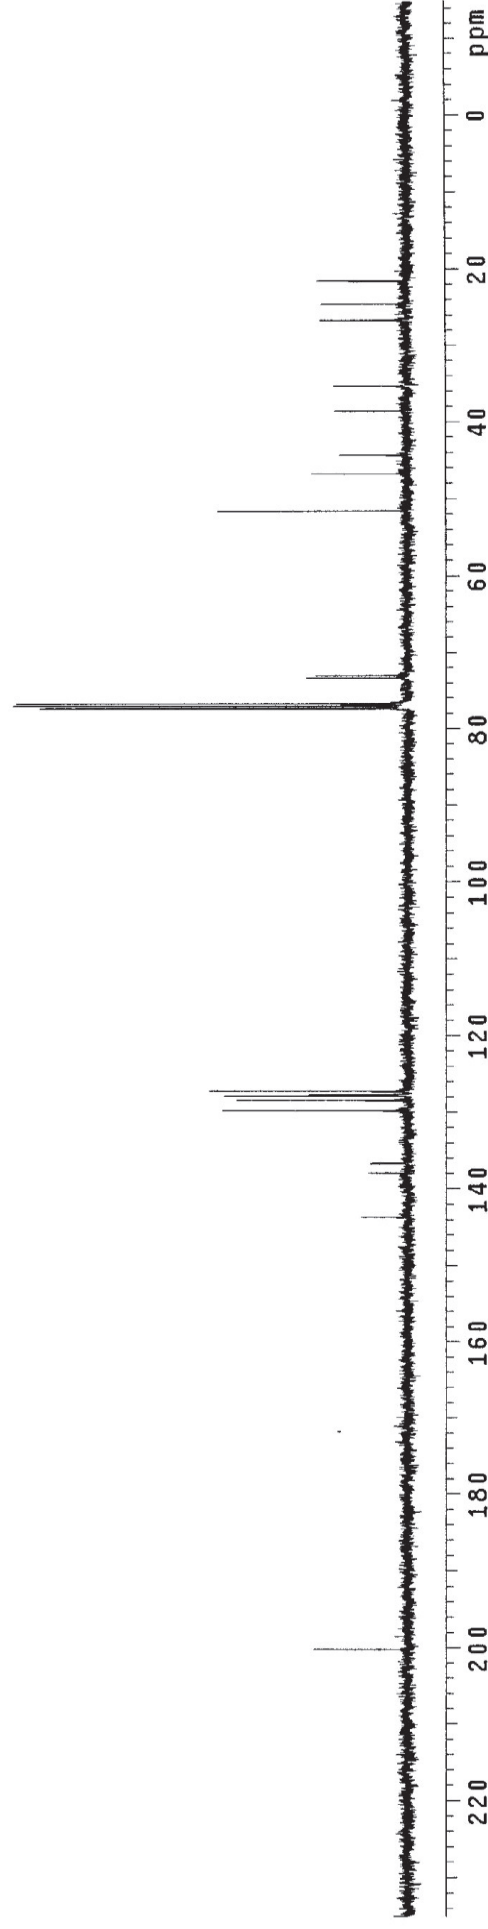

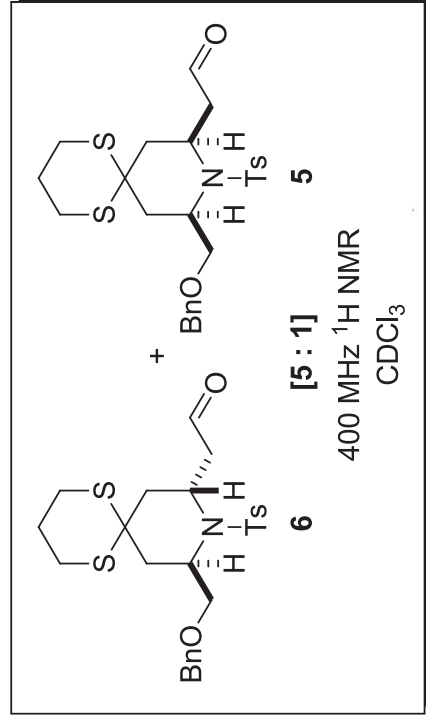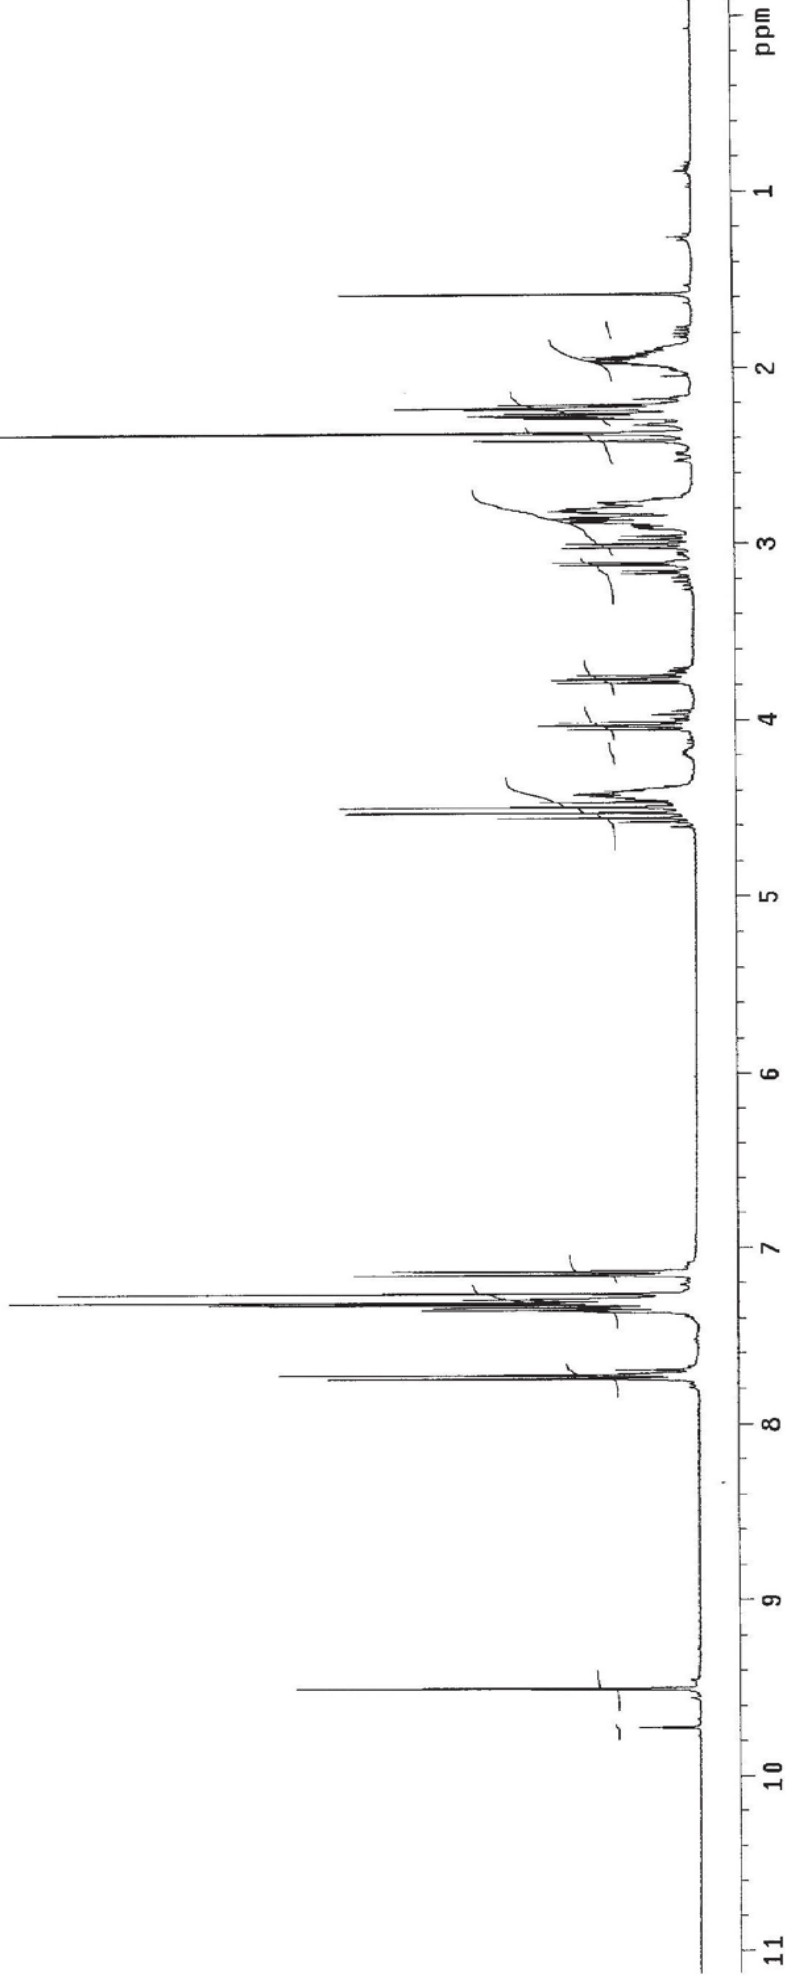

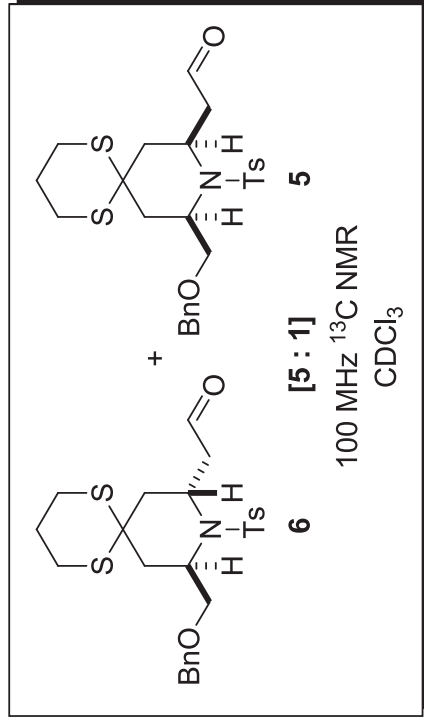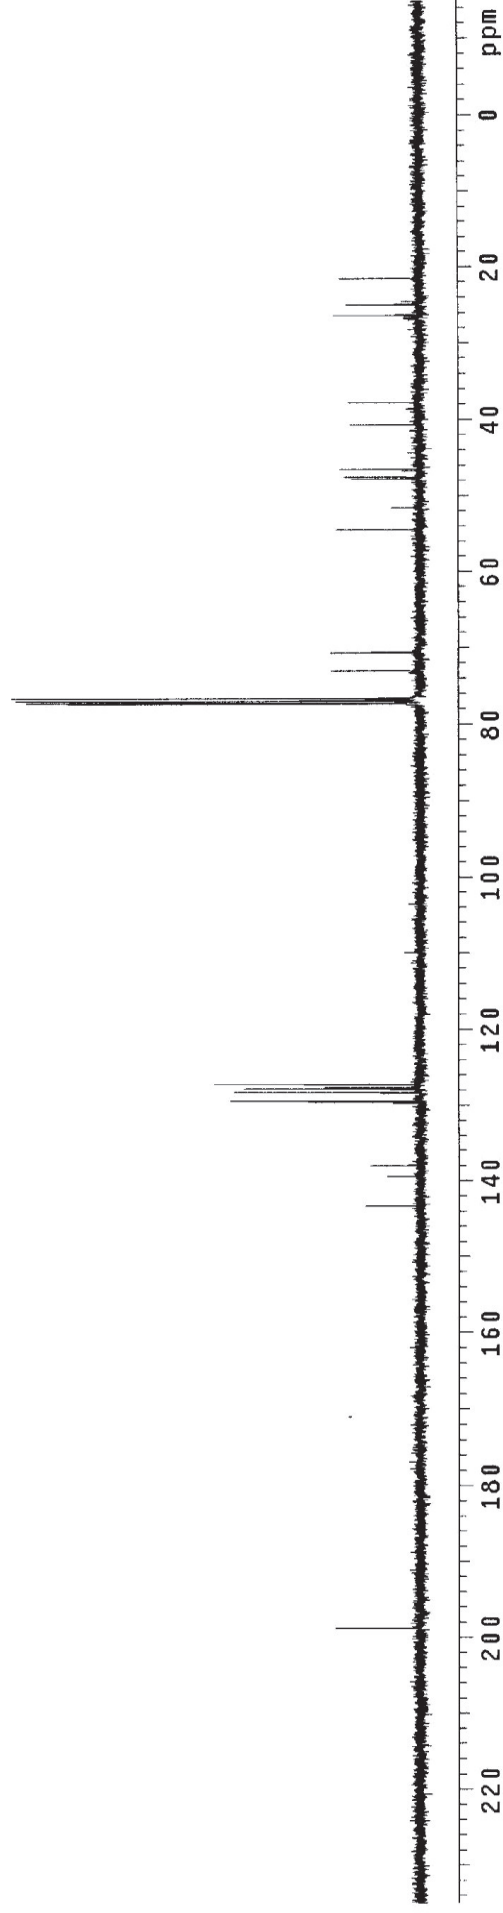

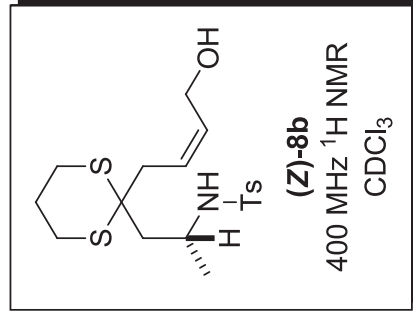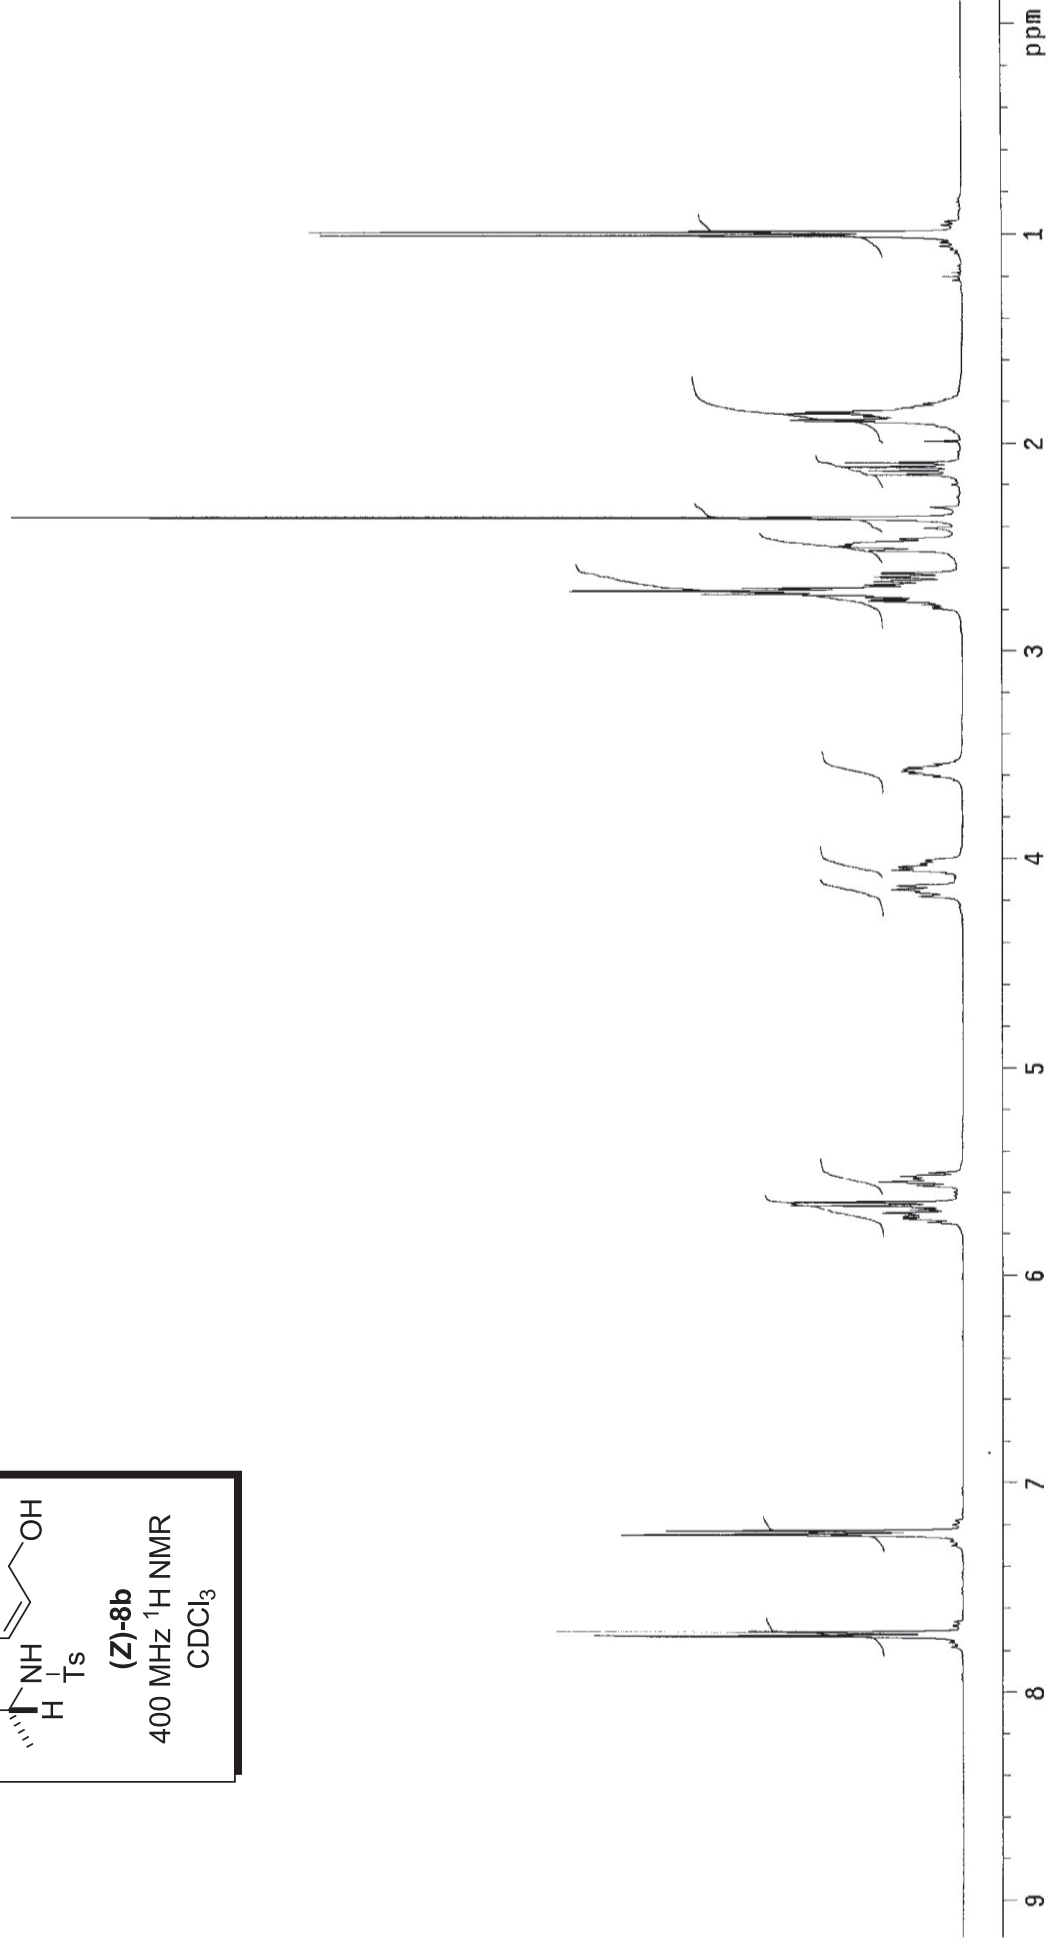

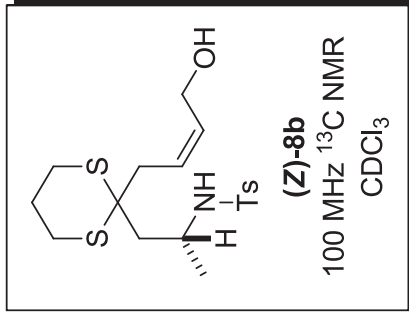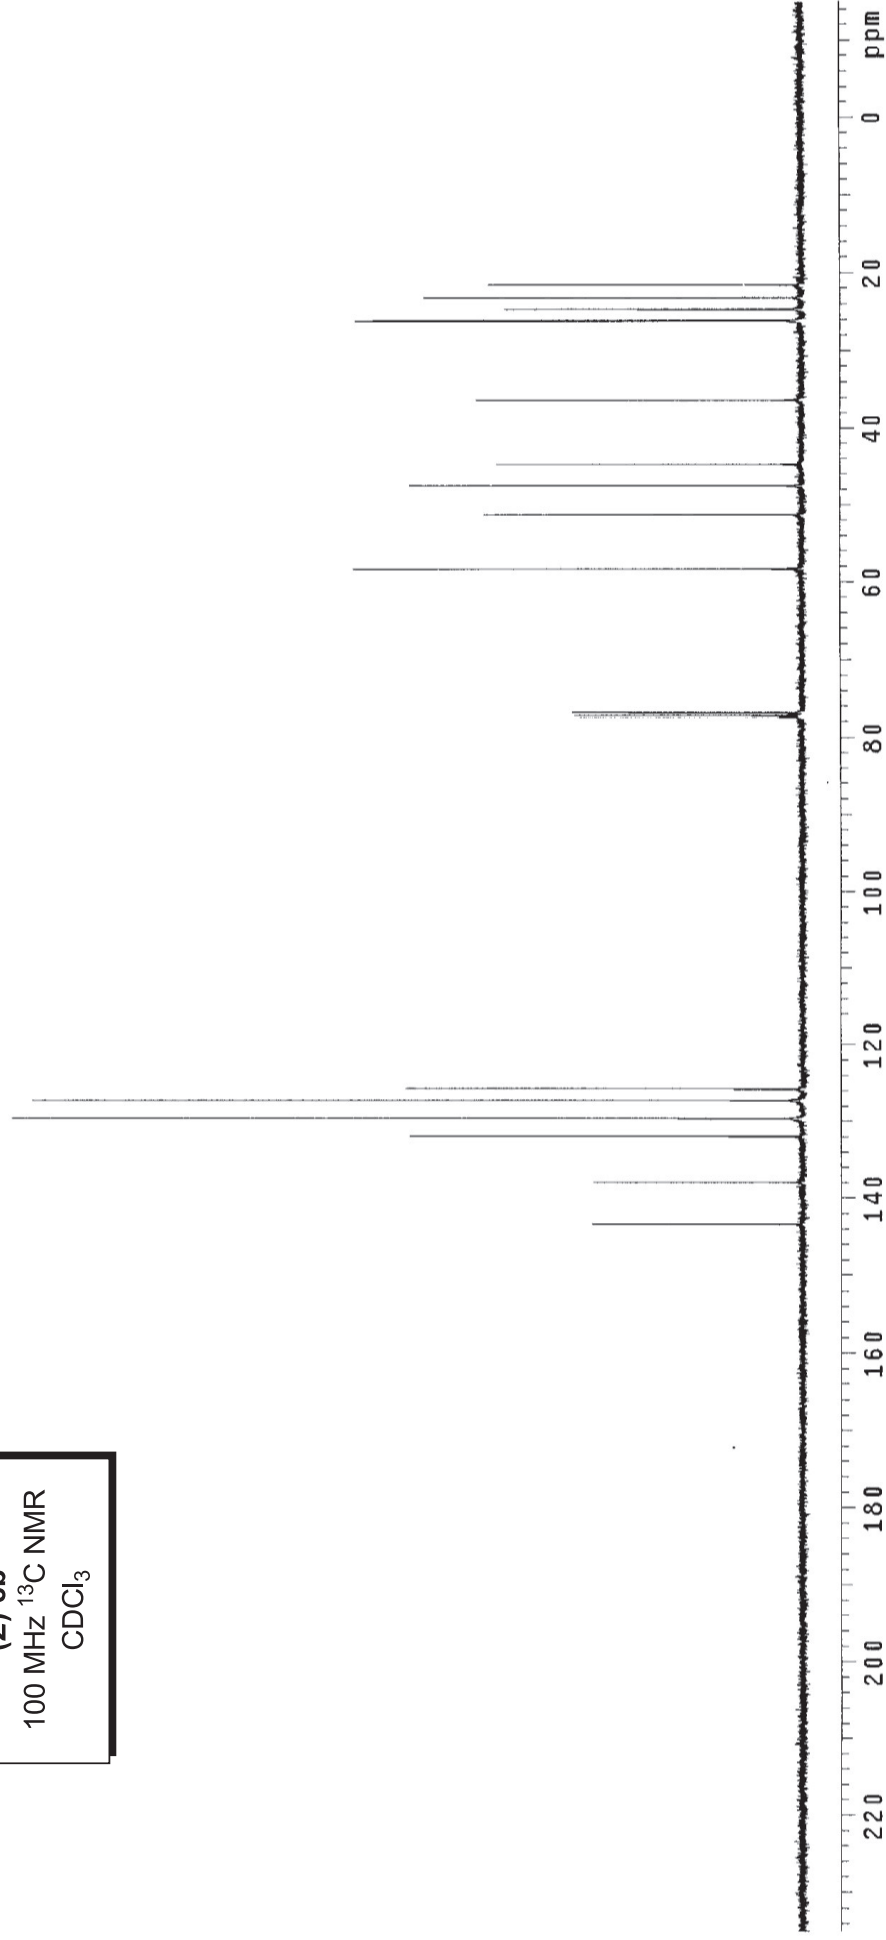



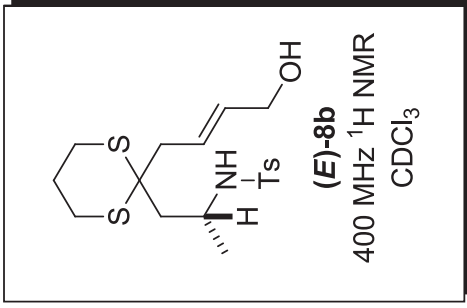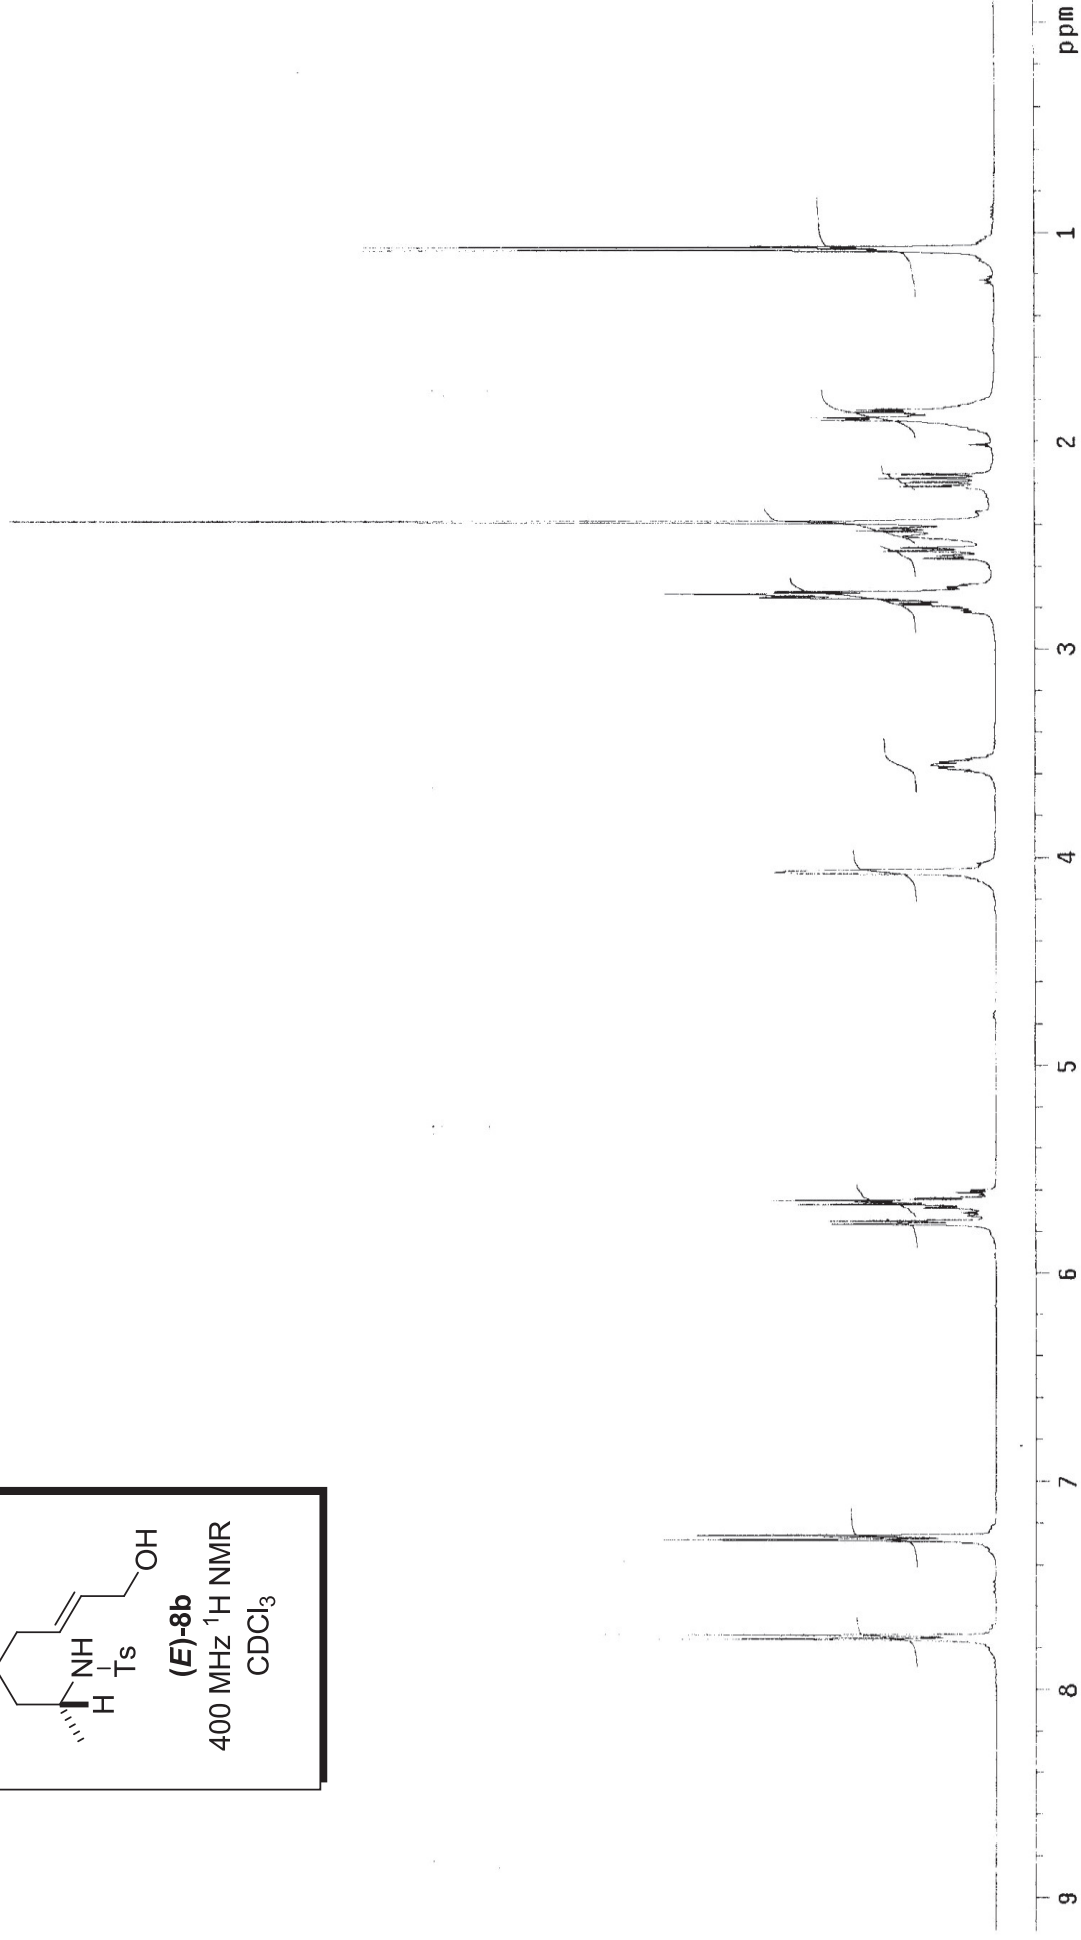

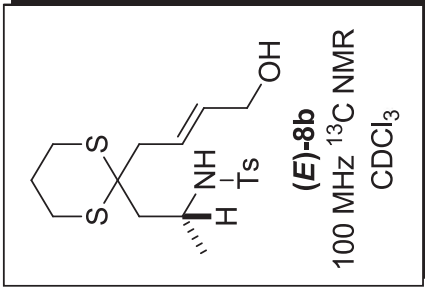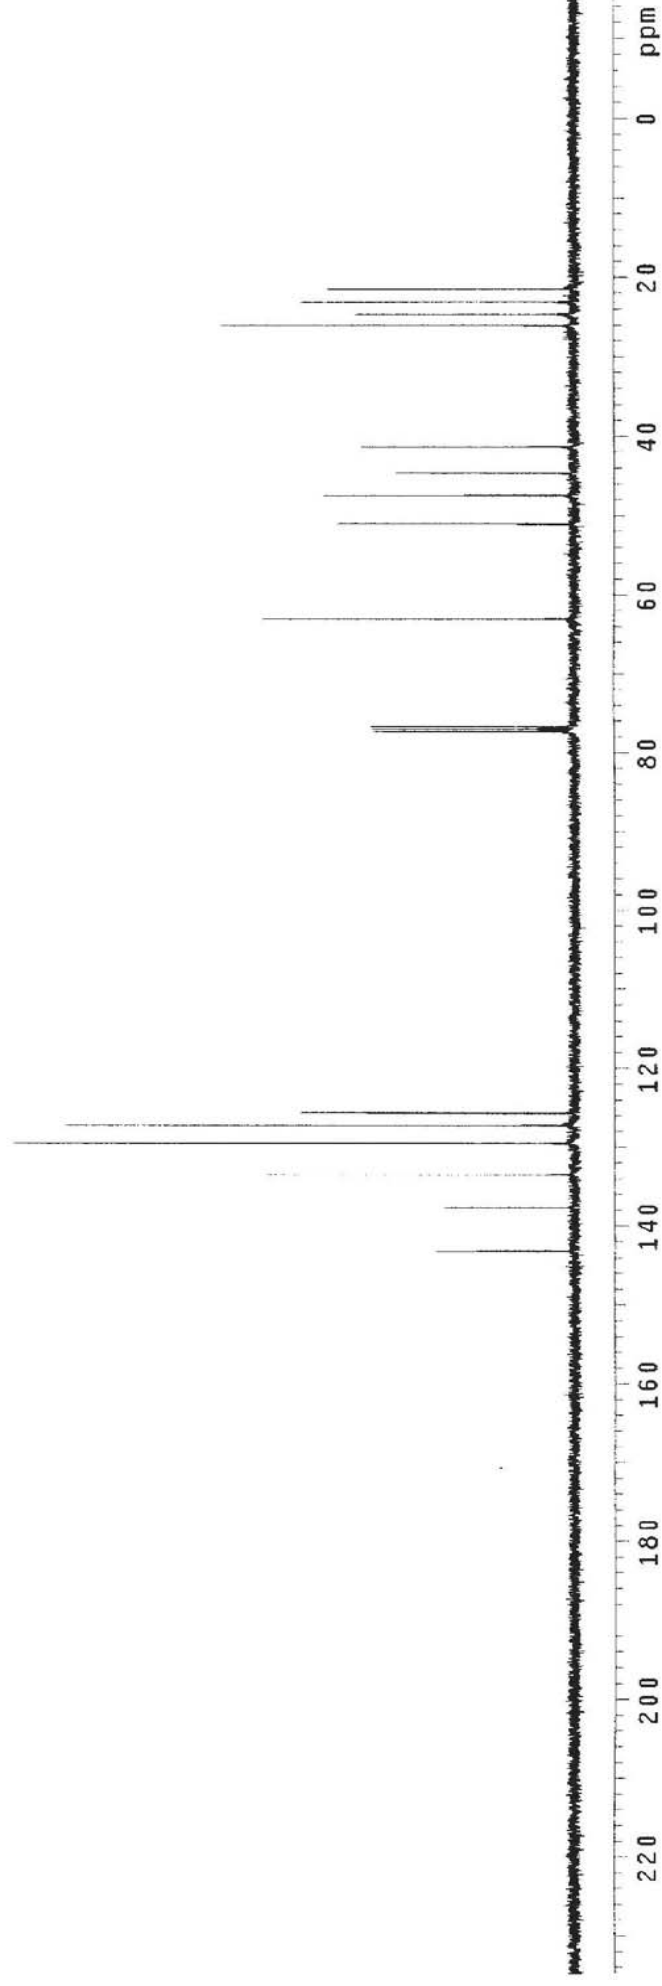

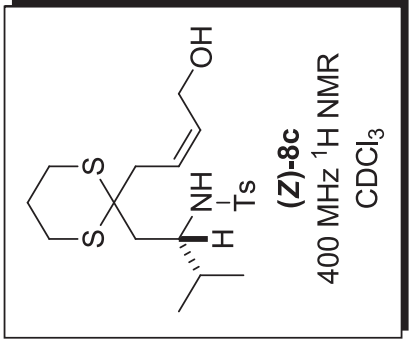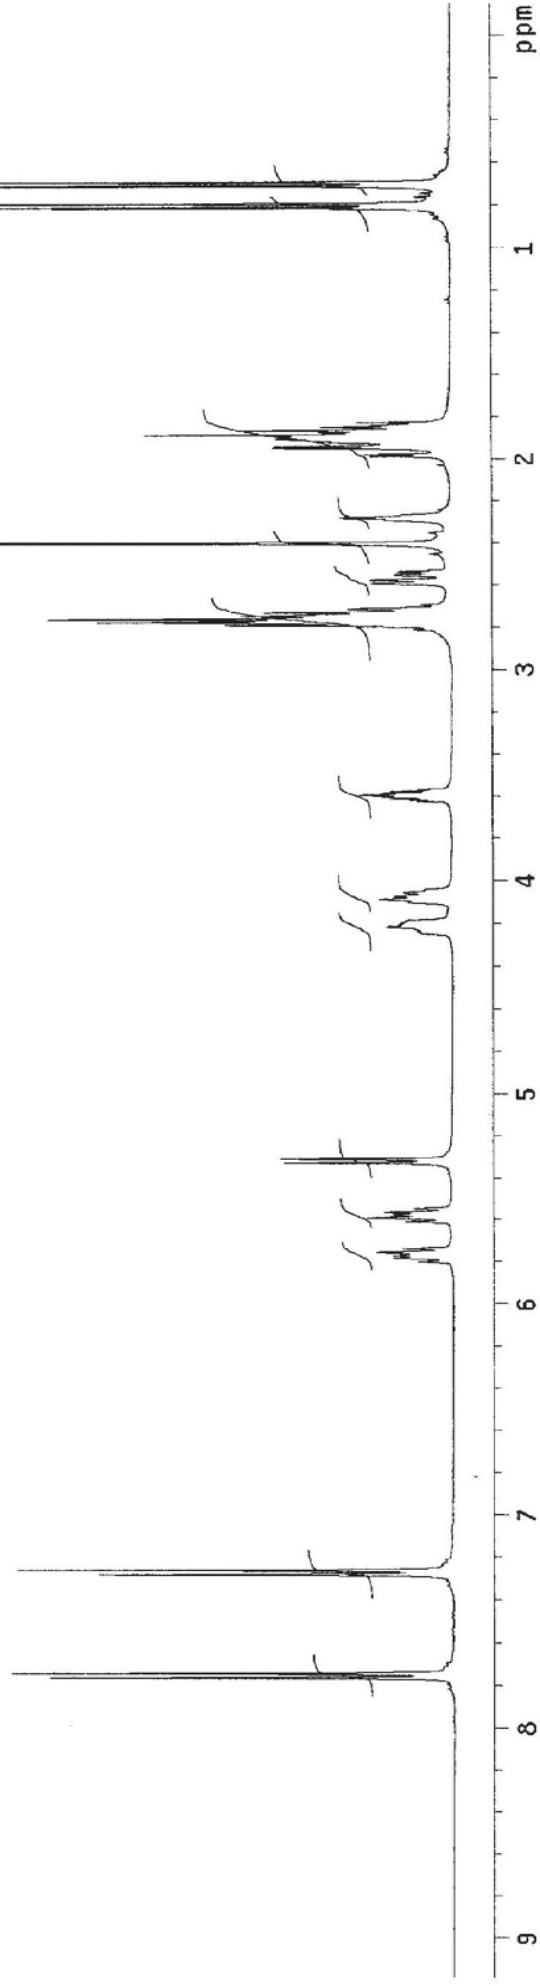

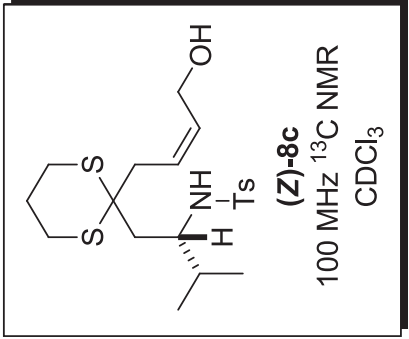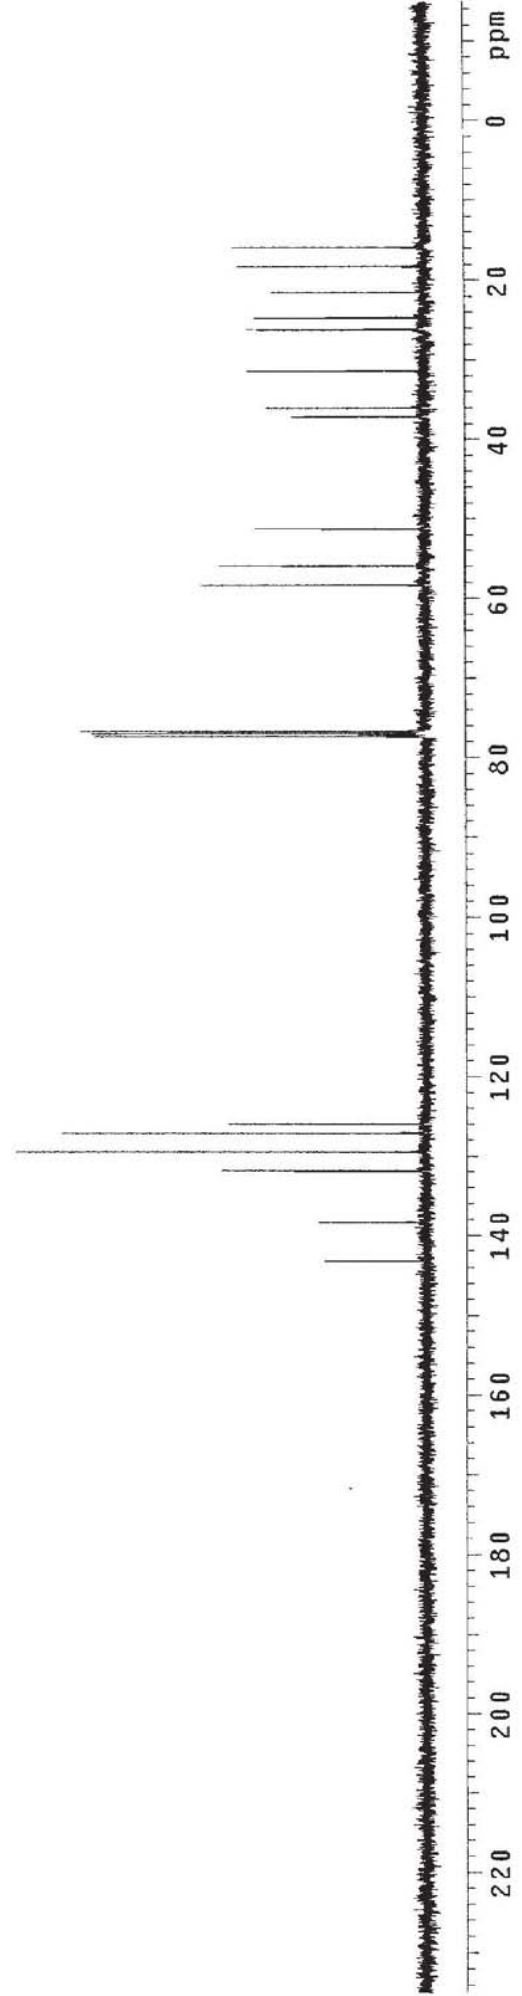

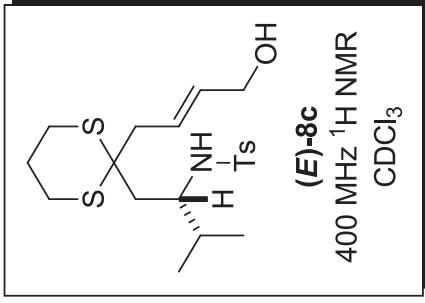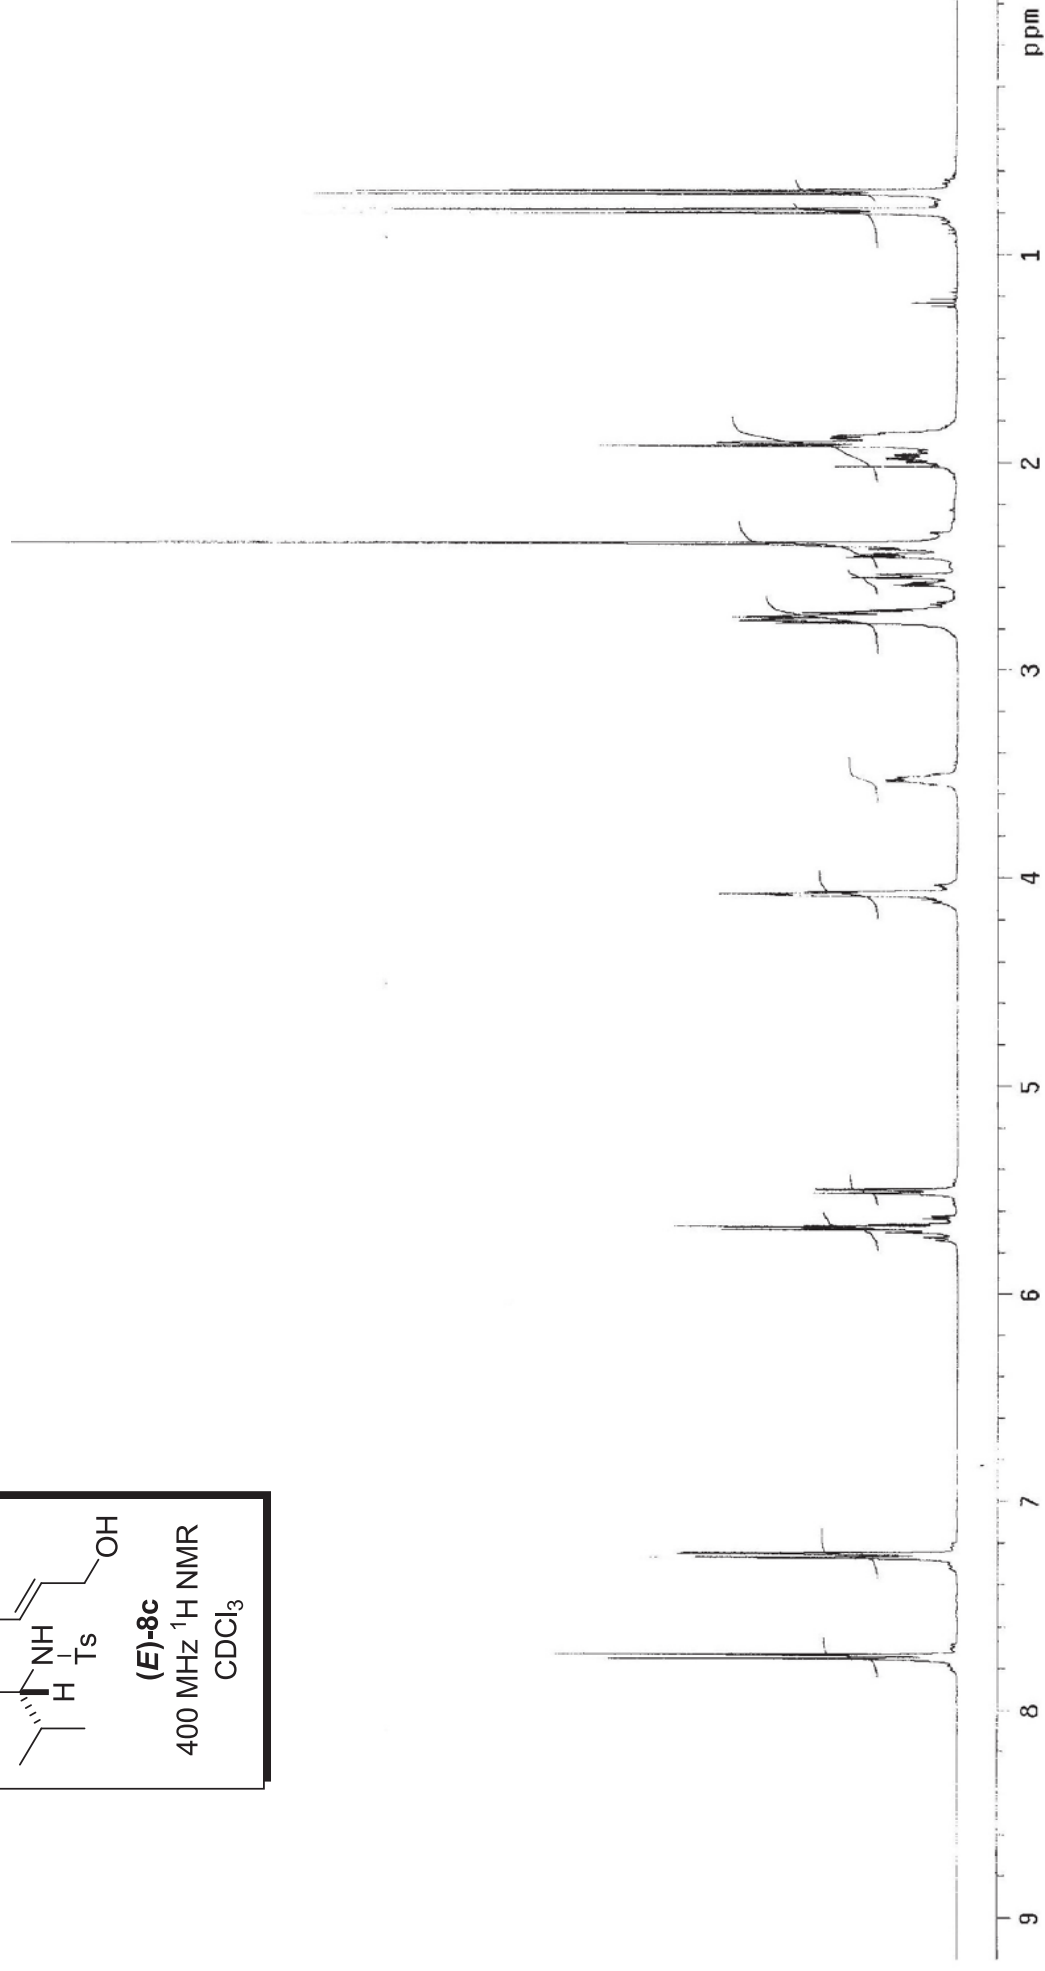

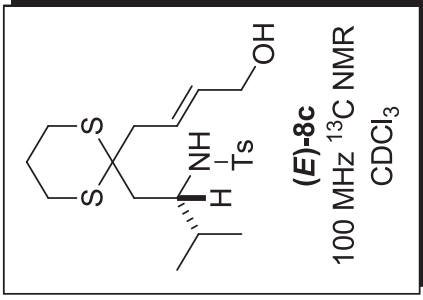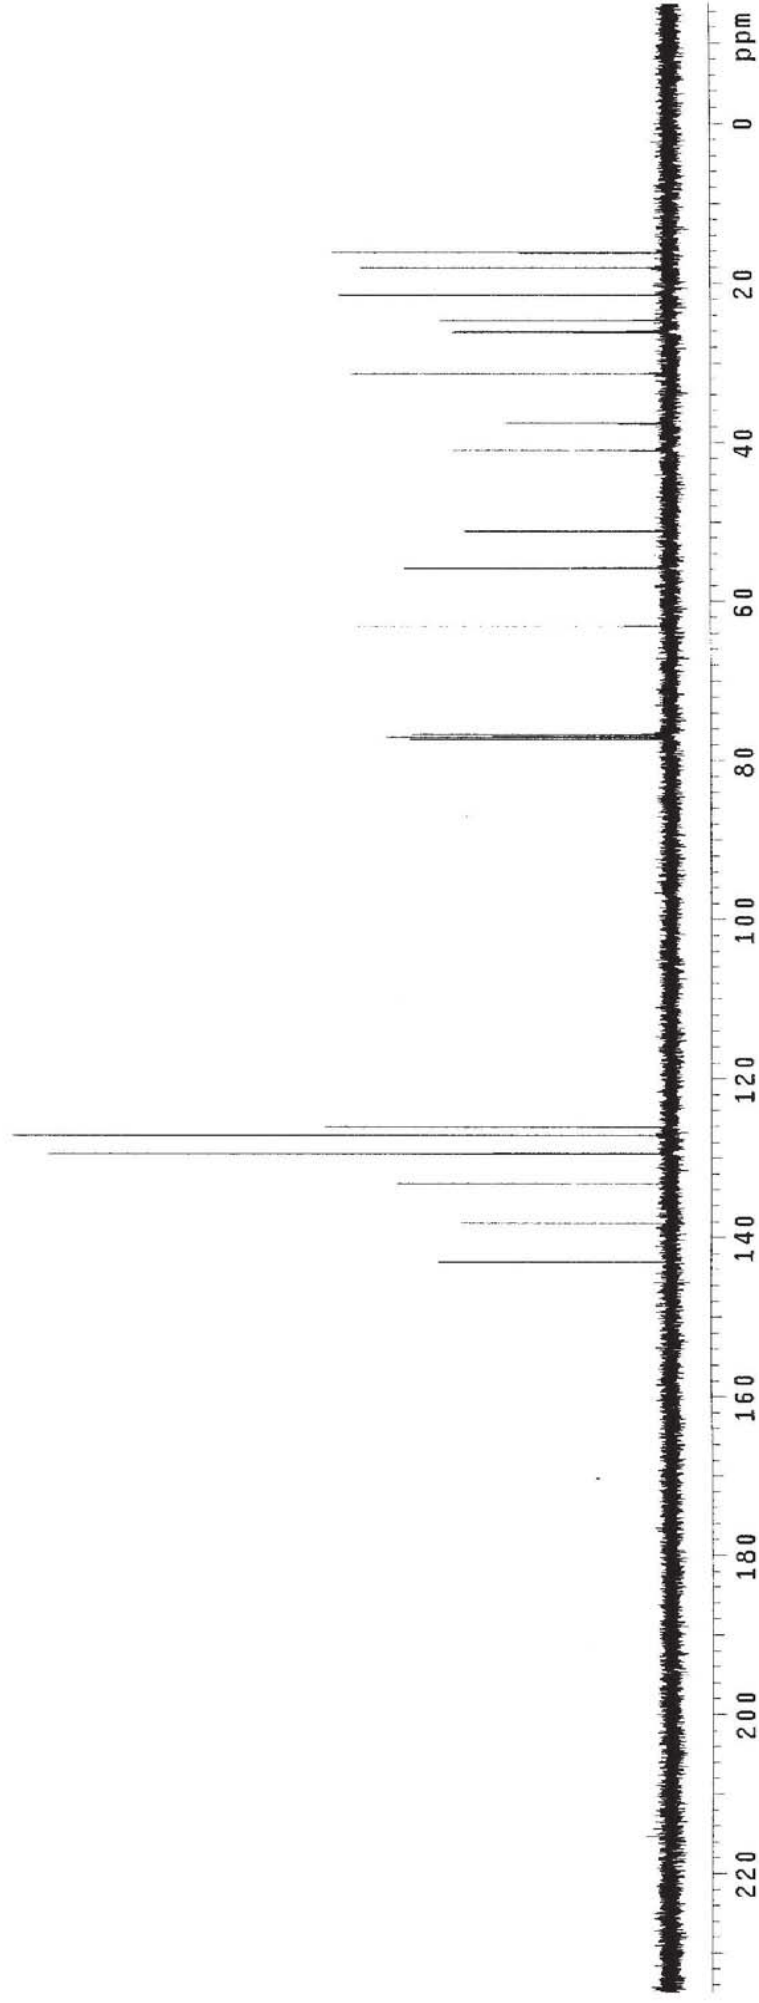

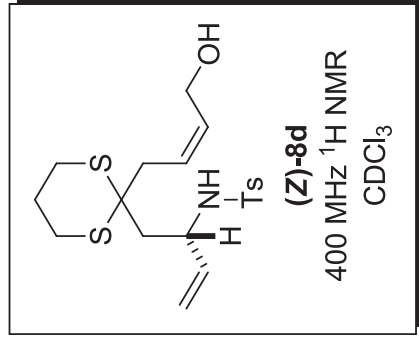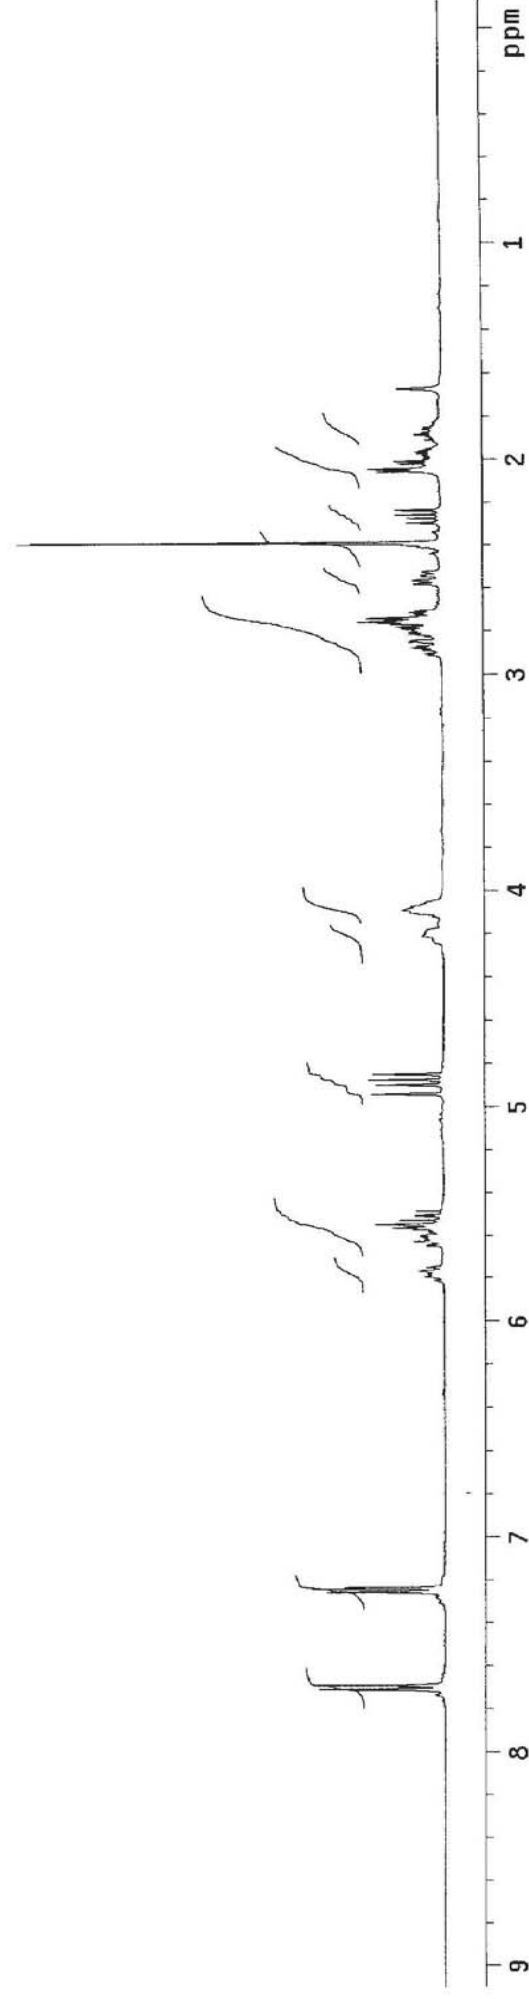

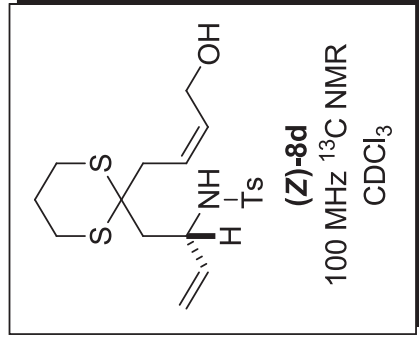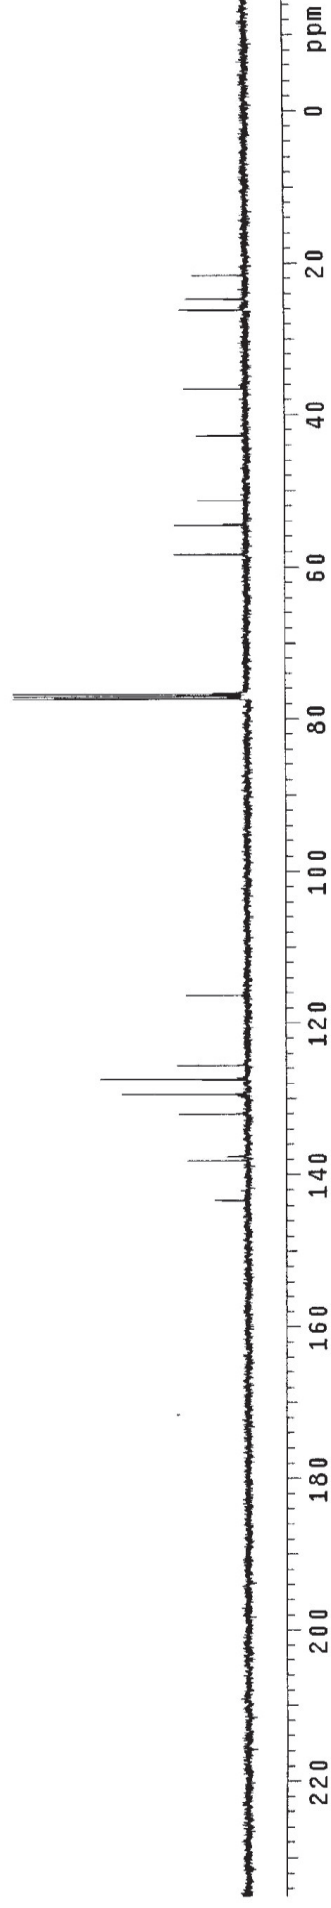



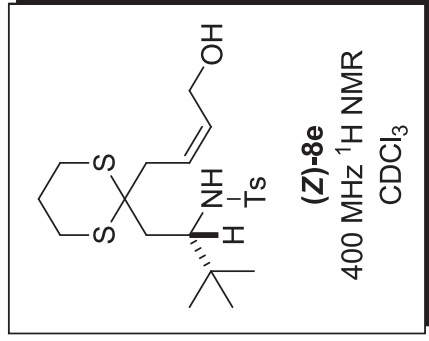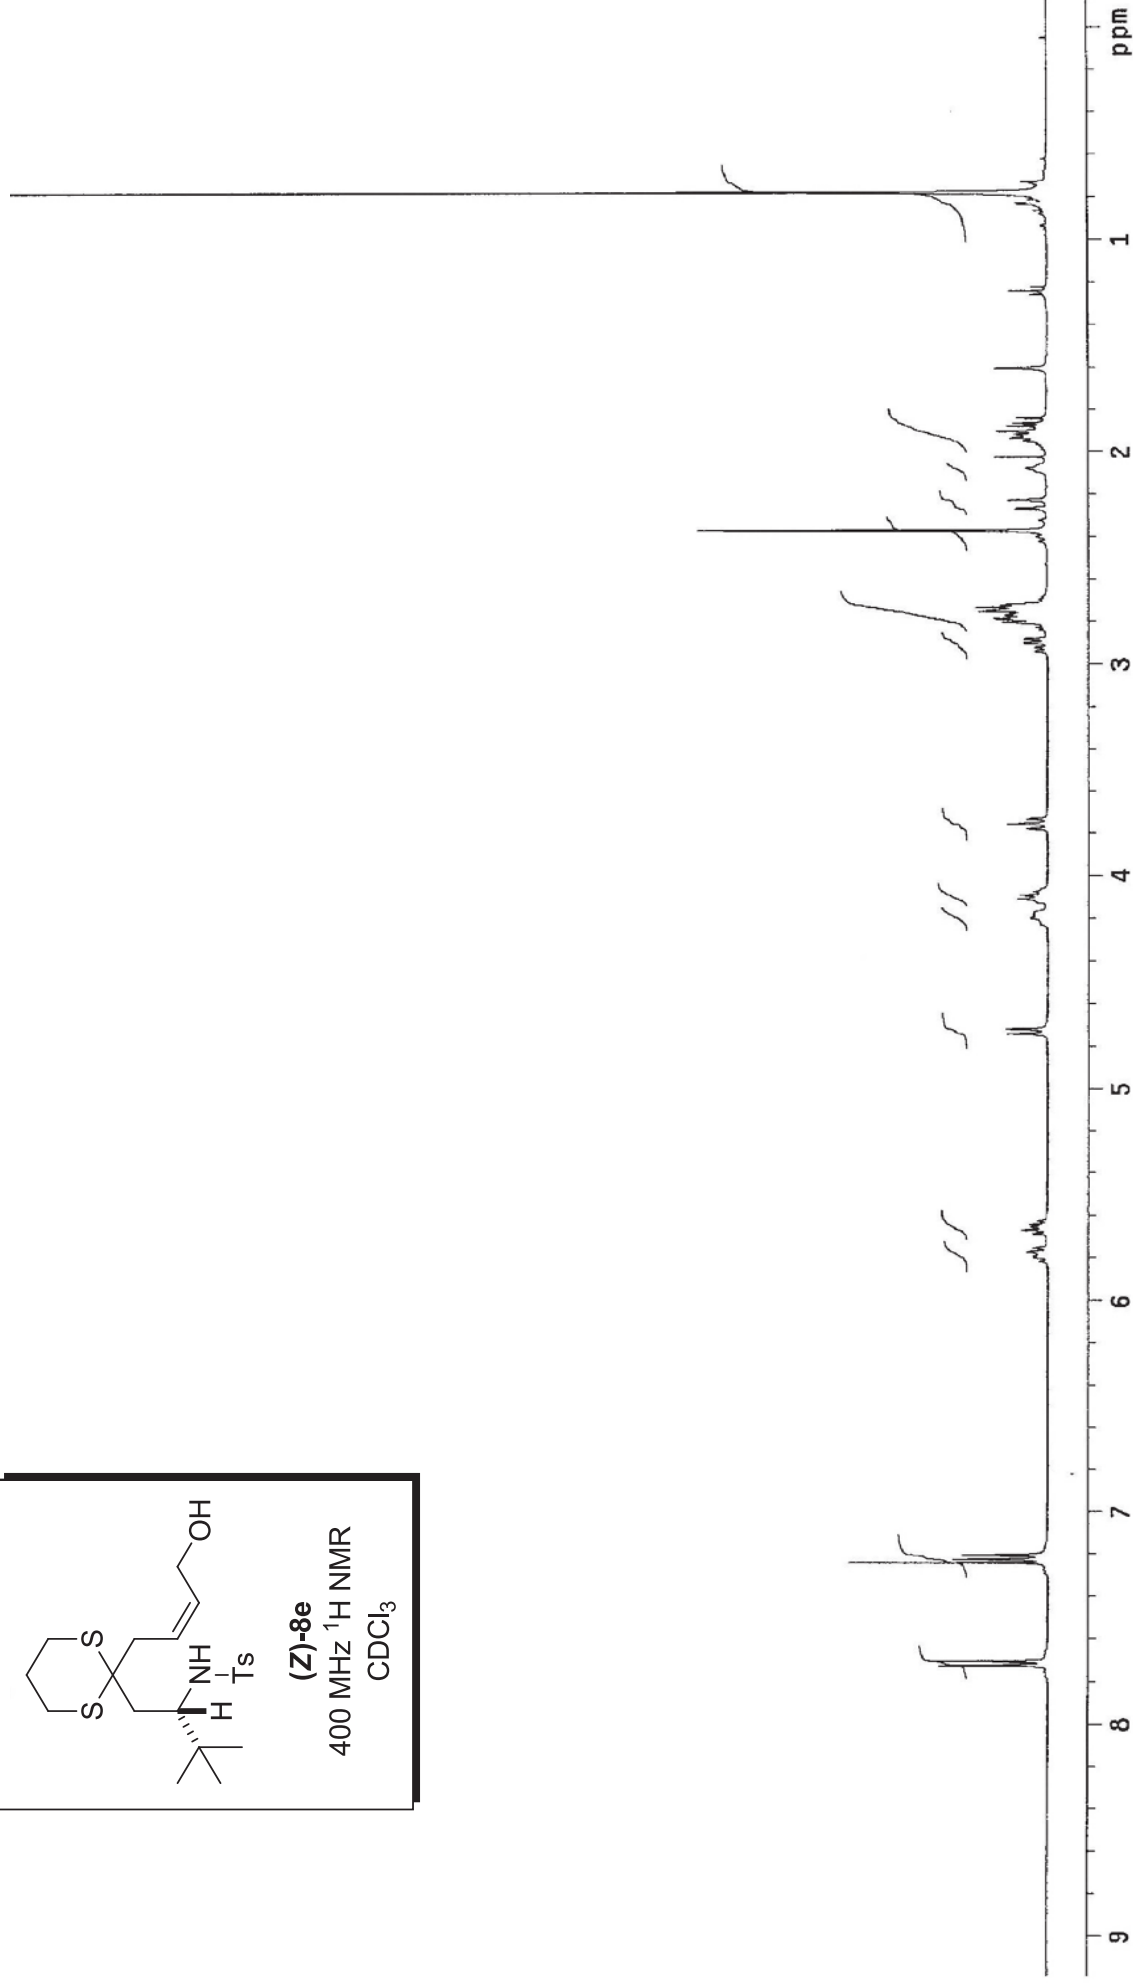

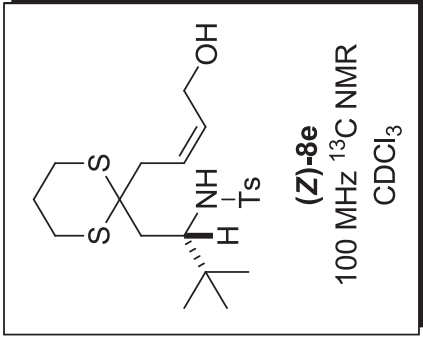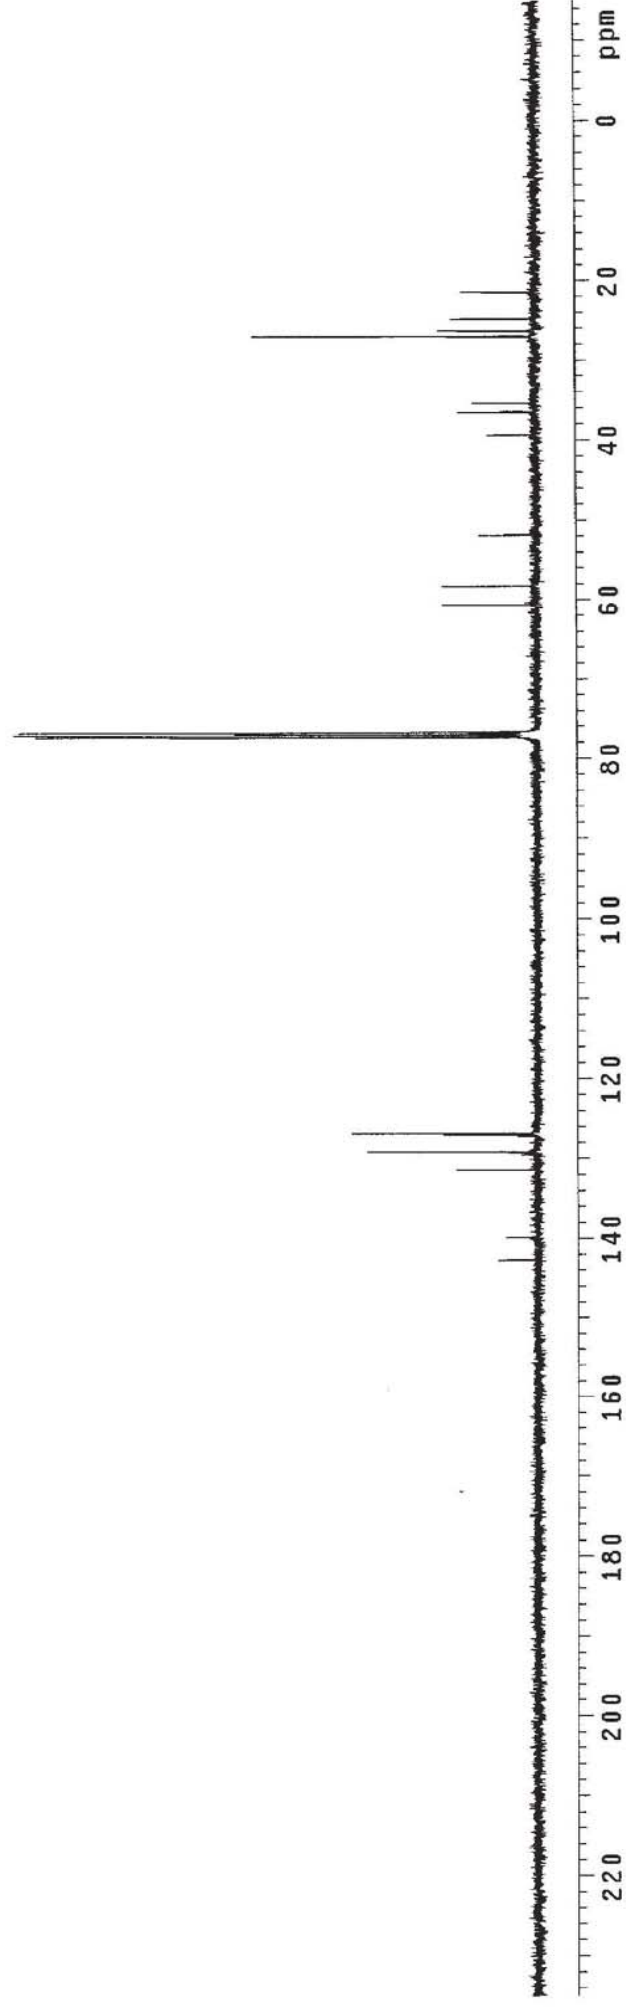

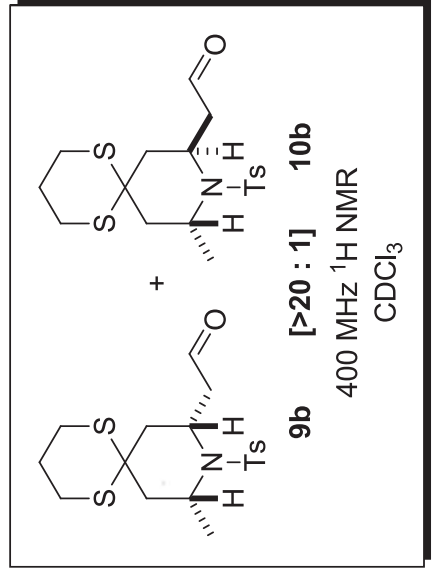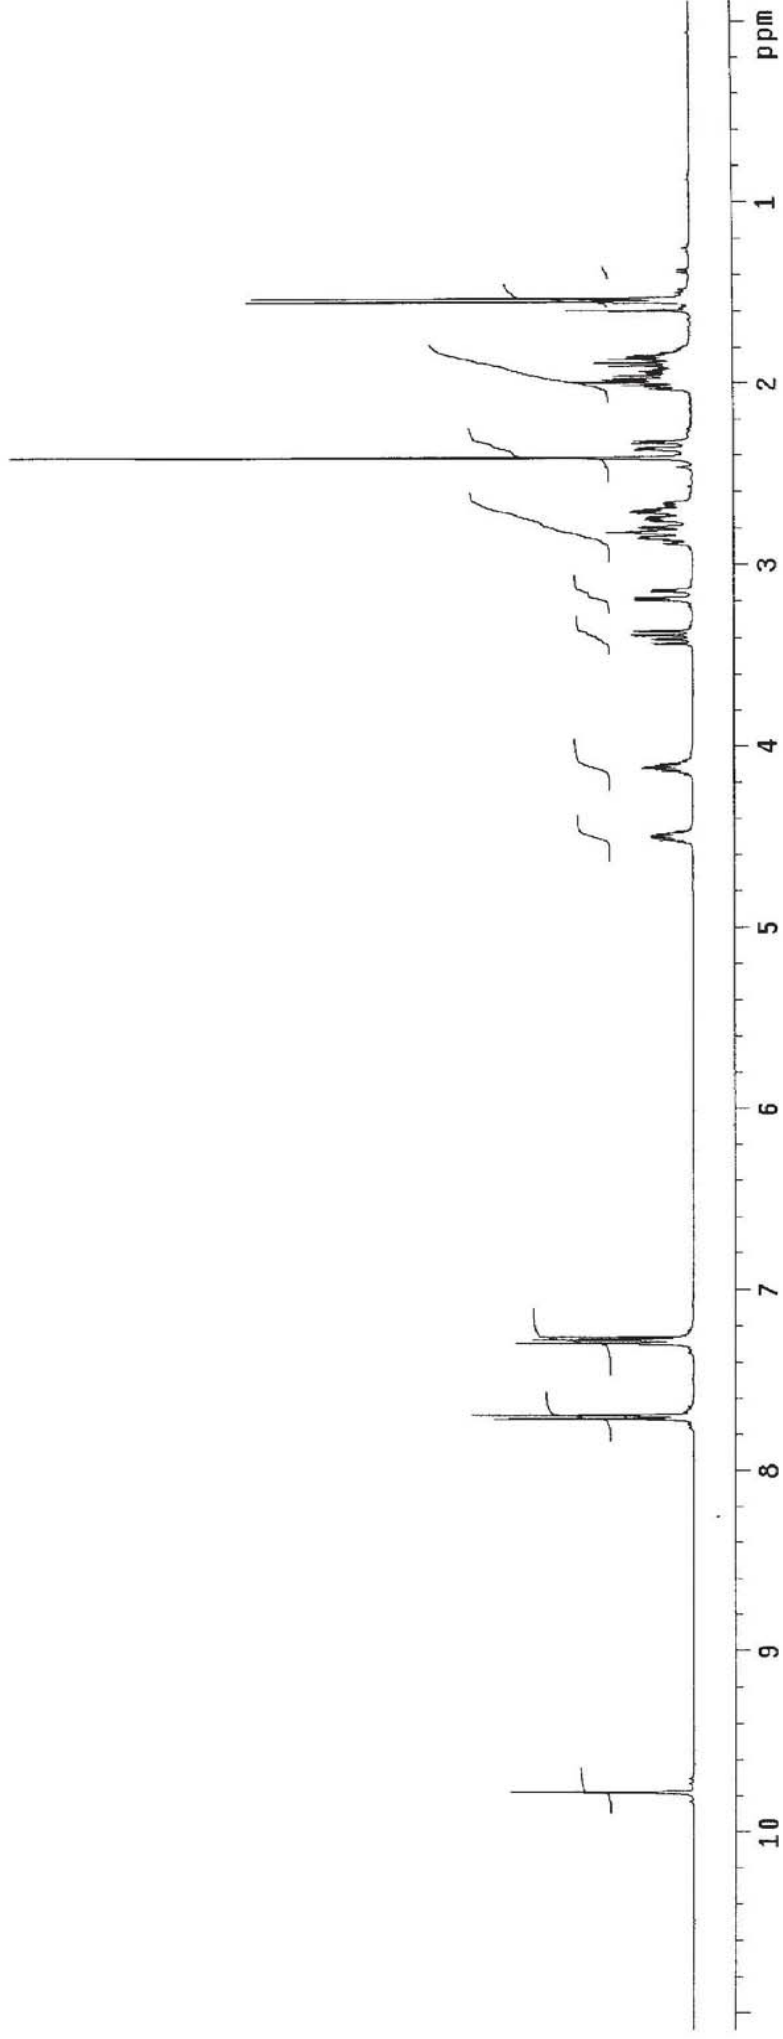

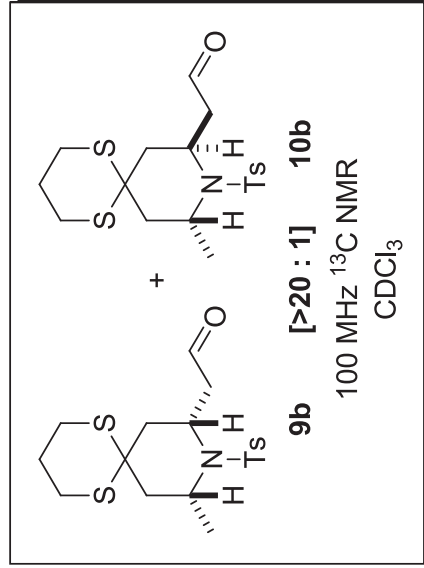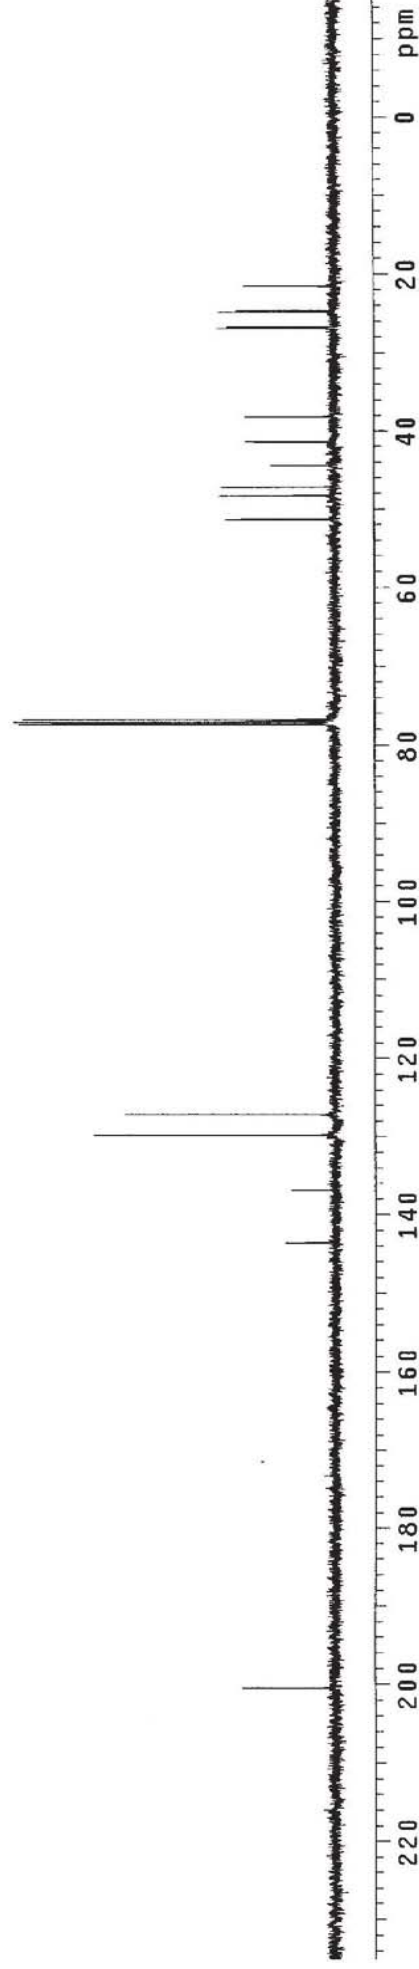

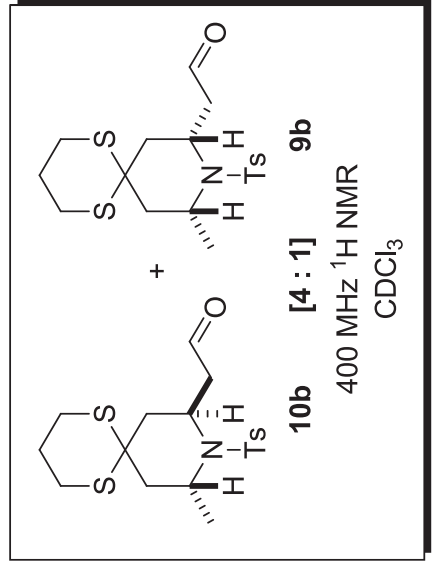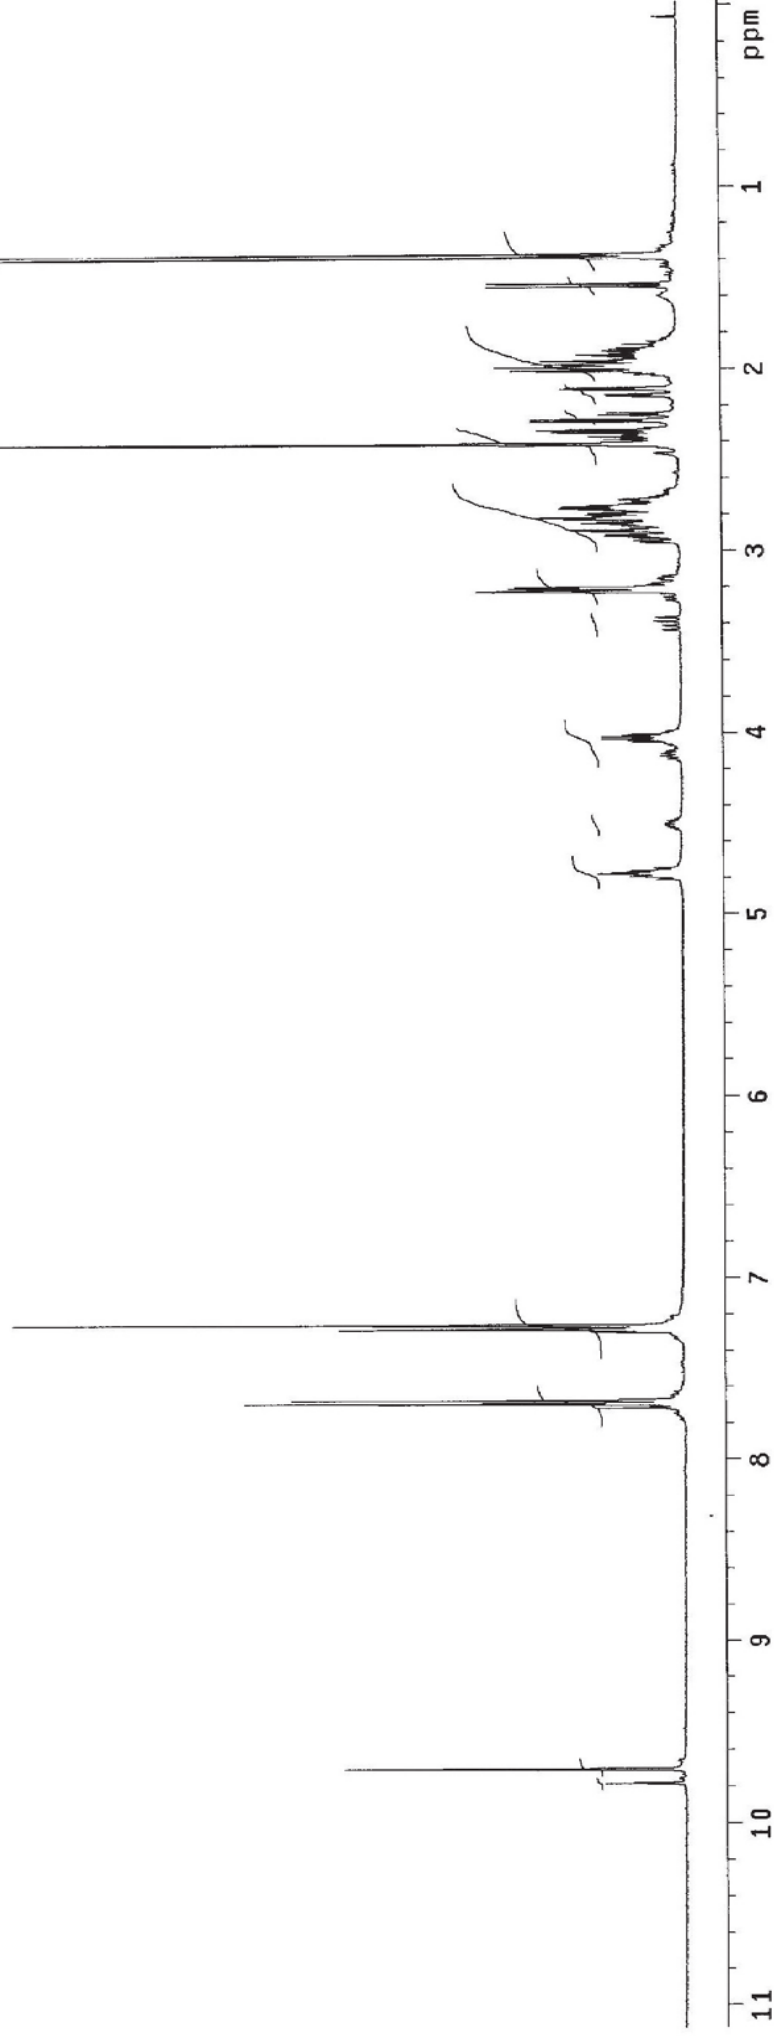

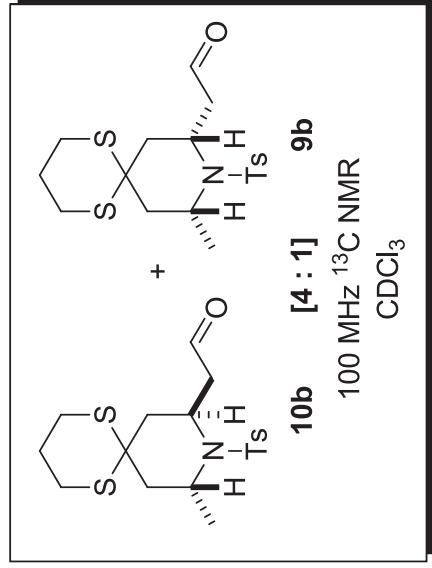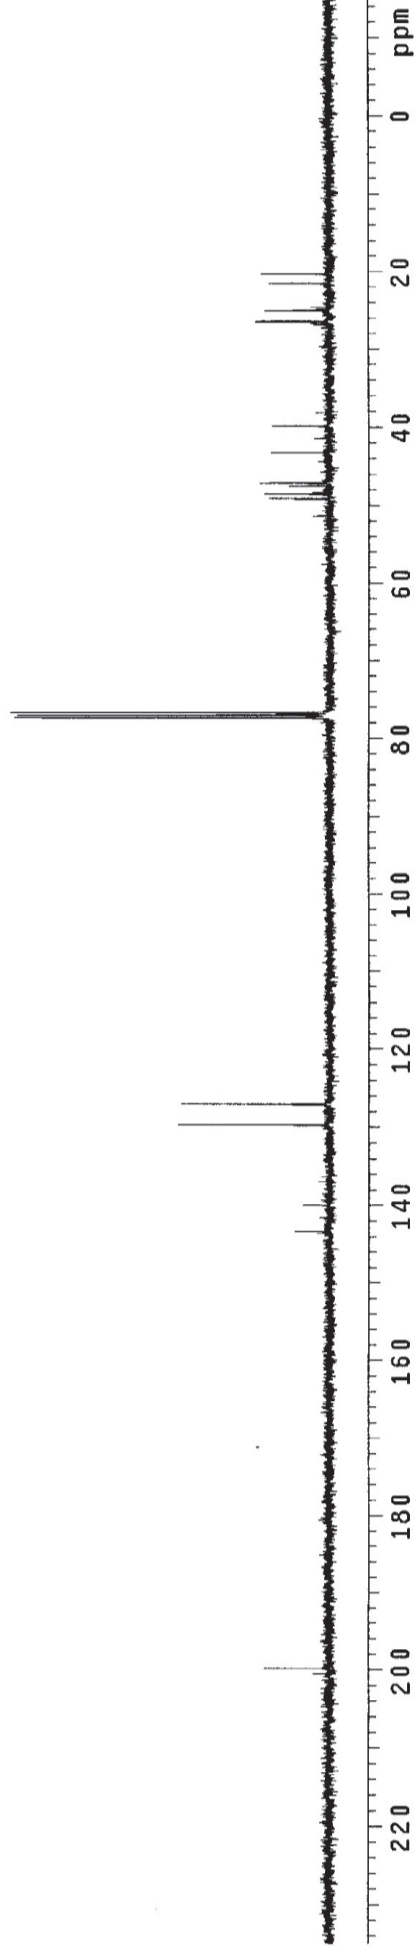

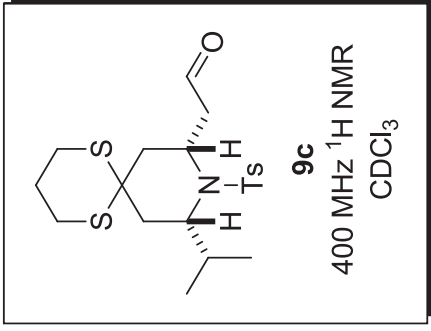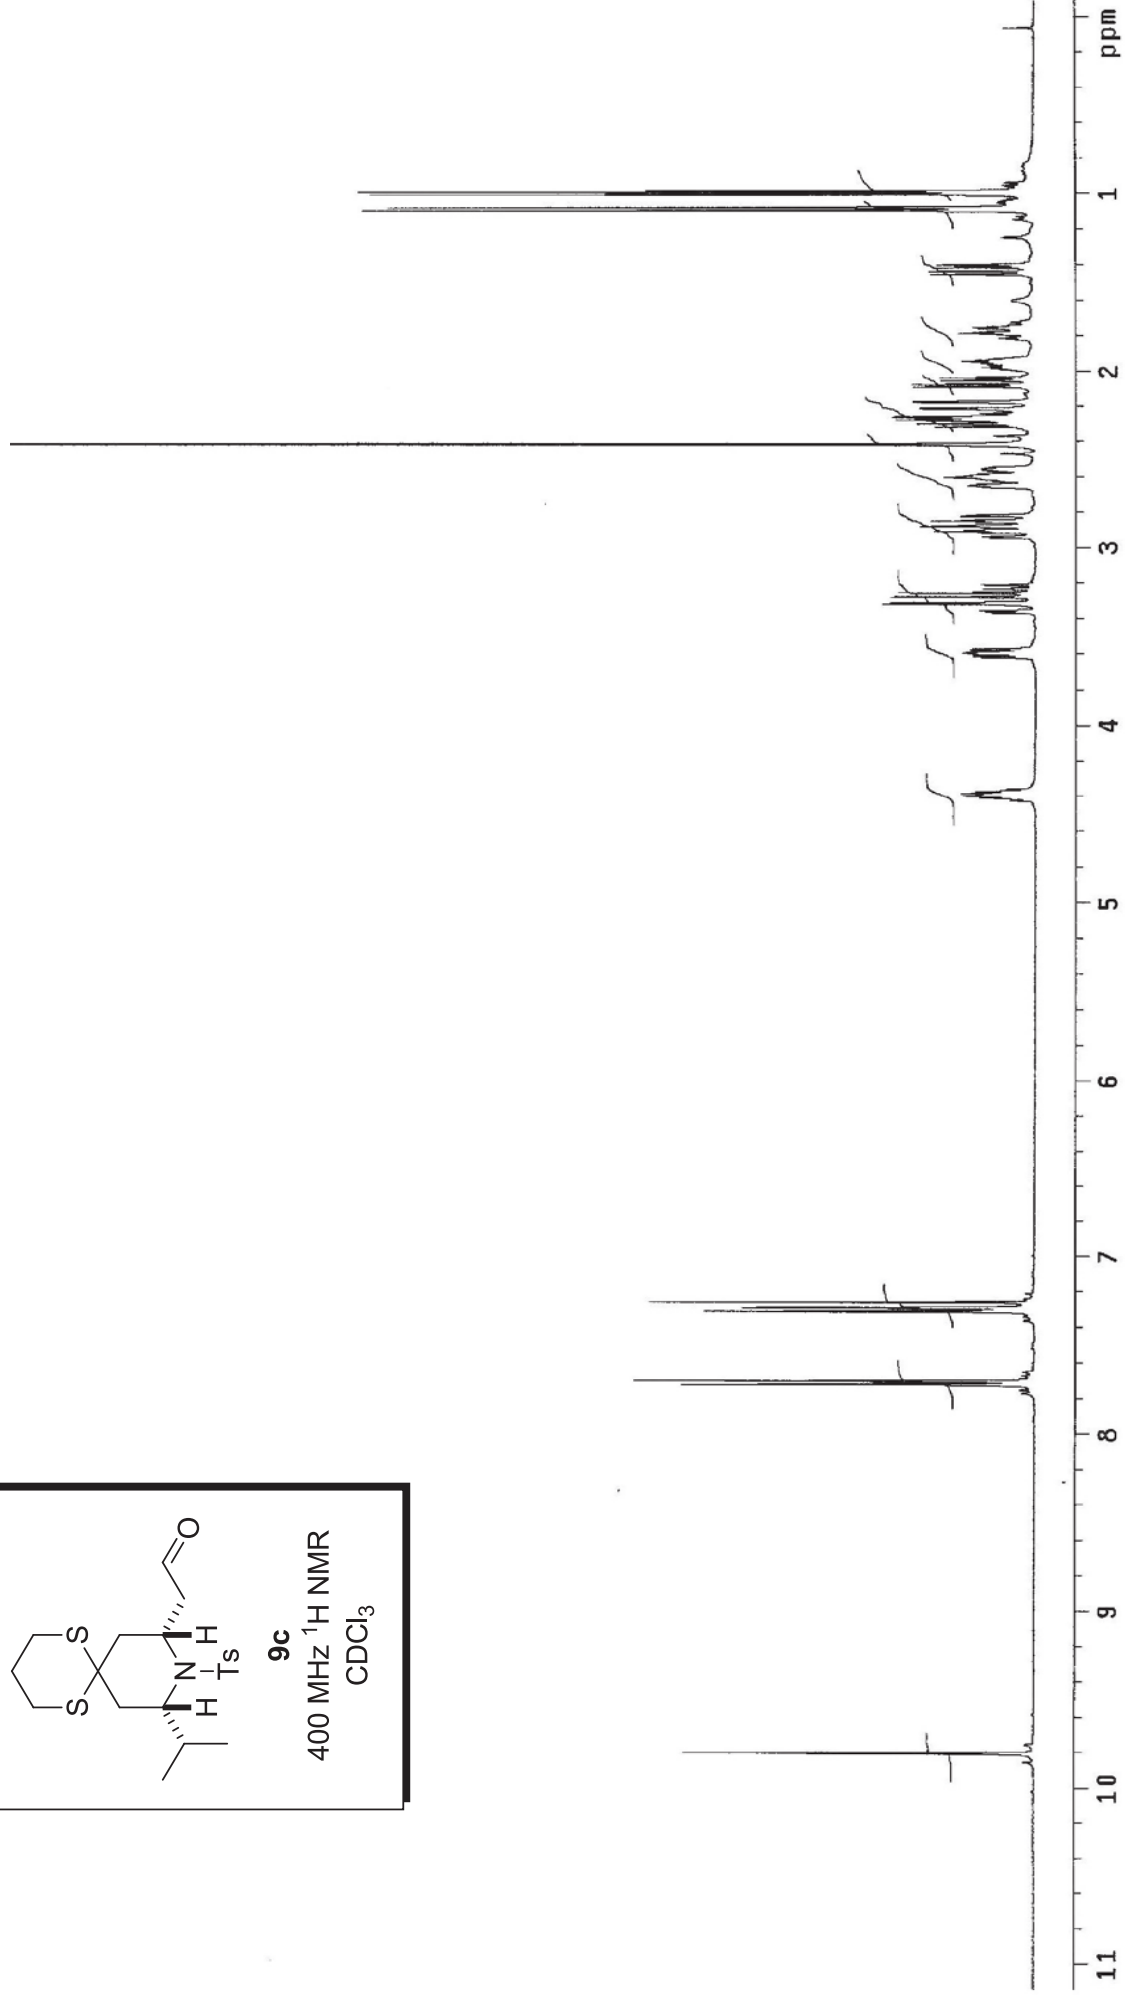

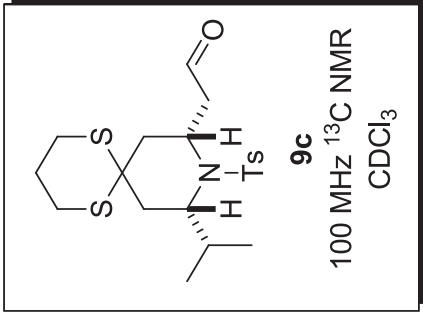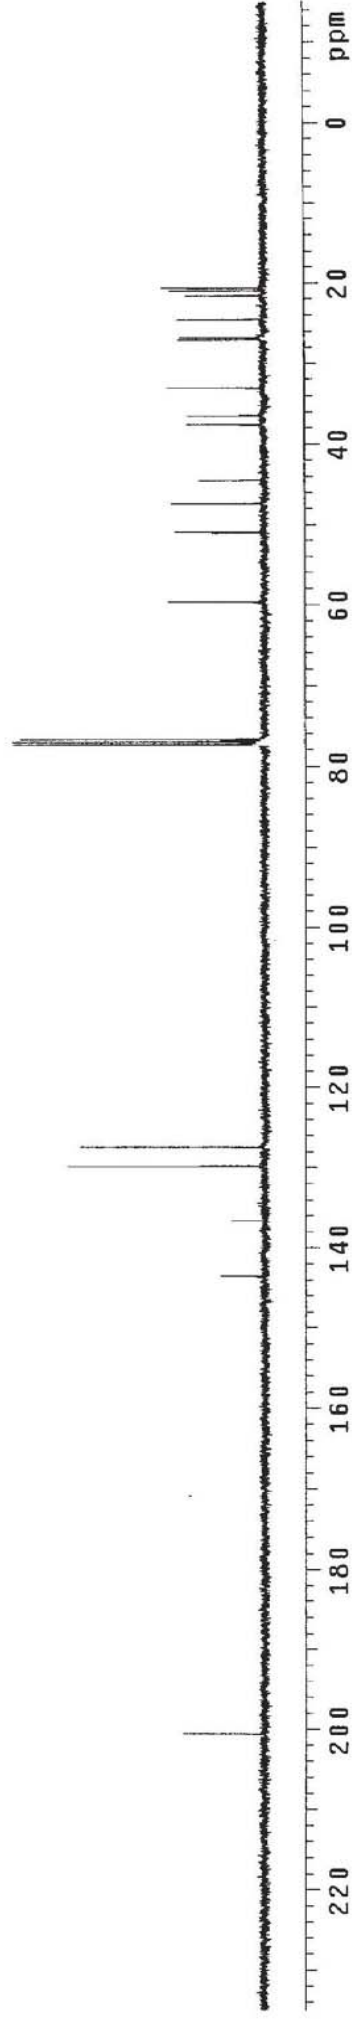



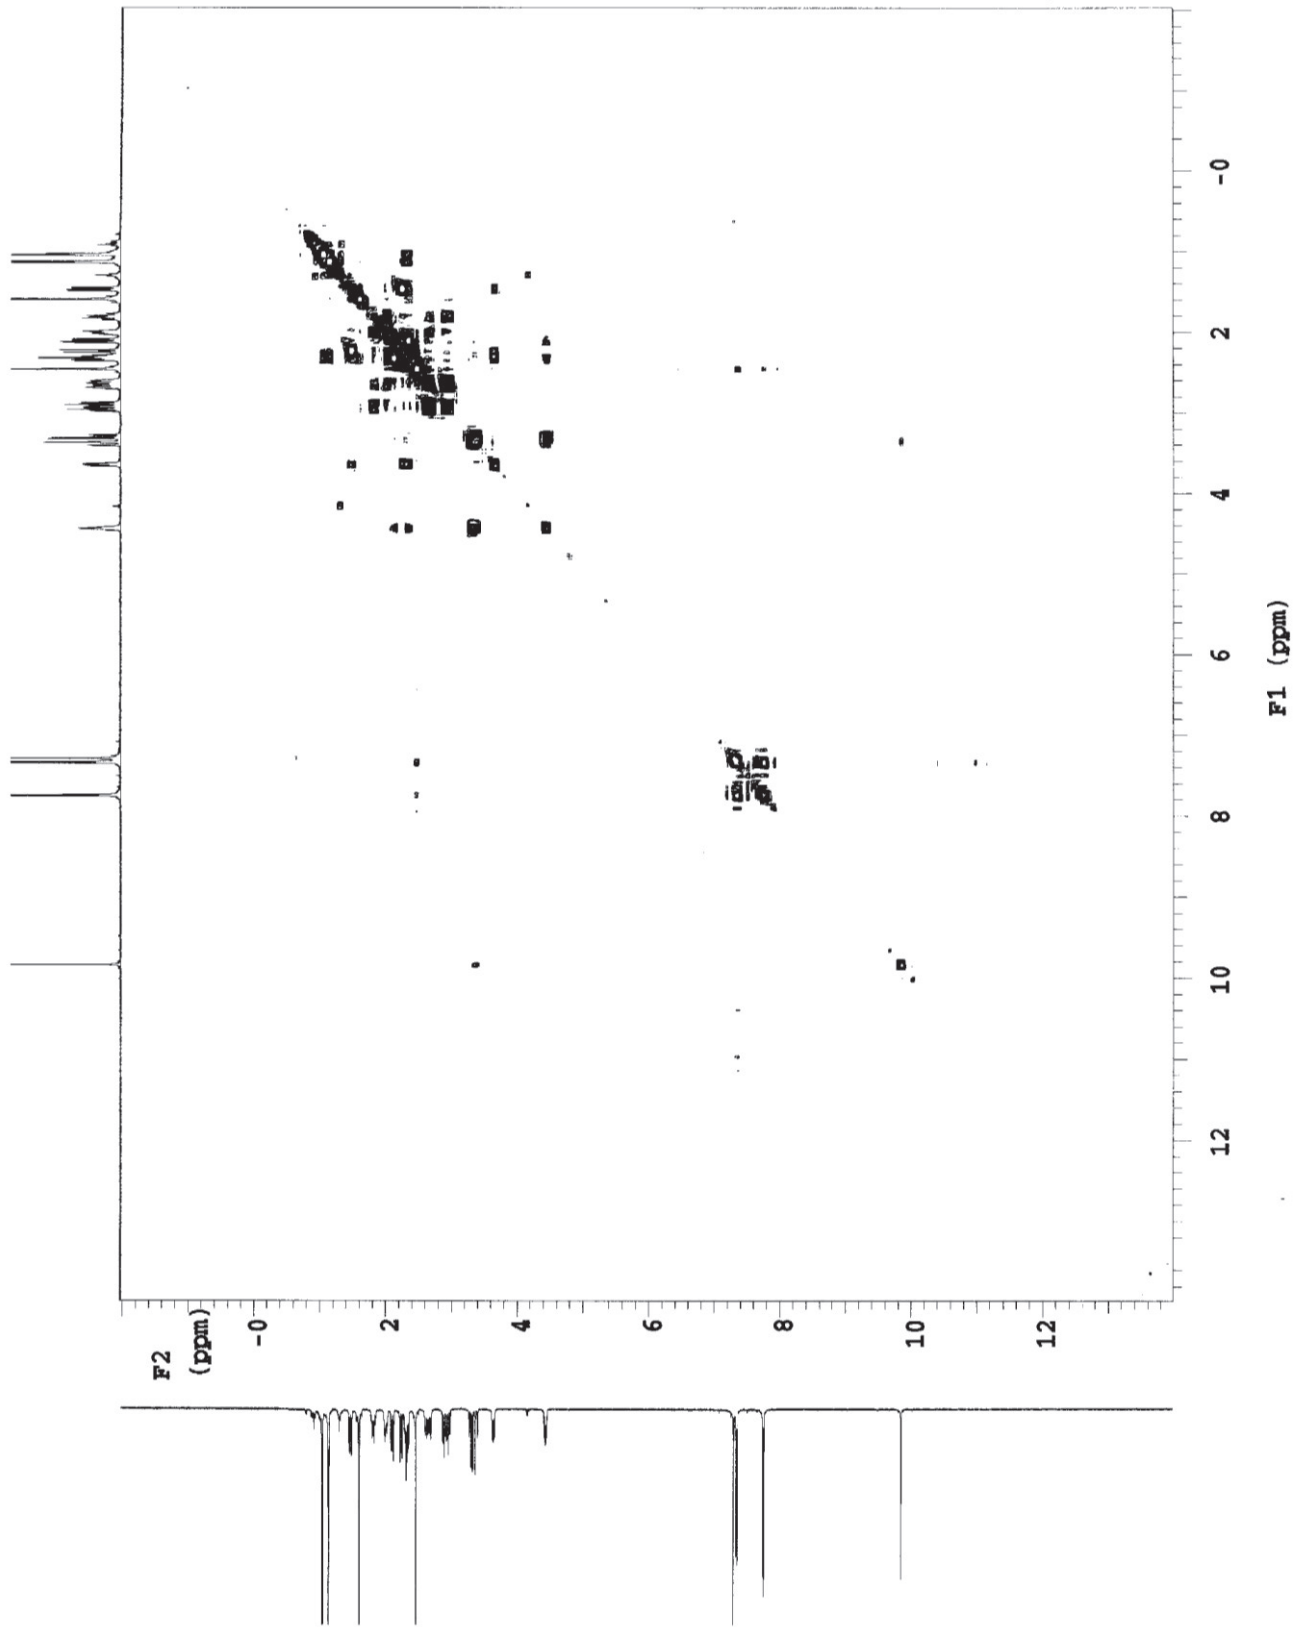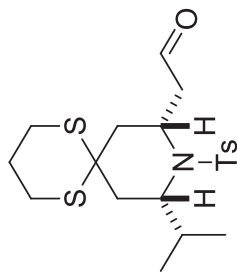

**9c**

500 MHz  $^1\text{H}$ - $^1\text{H}$  COSY NMR  
 $\text{CDCl}_3$



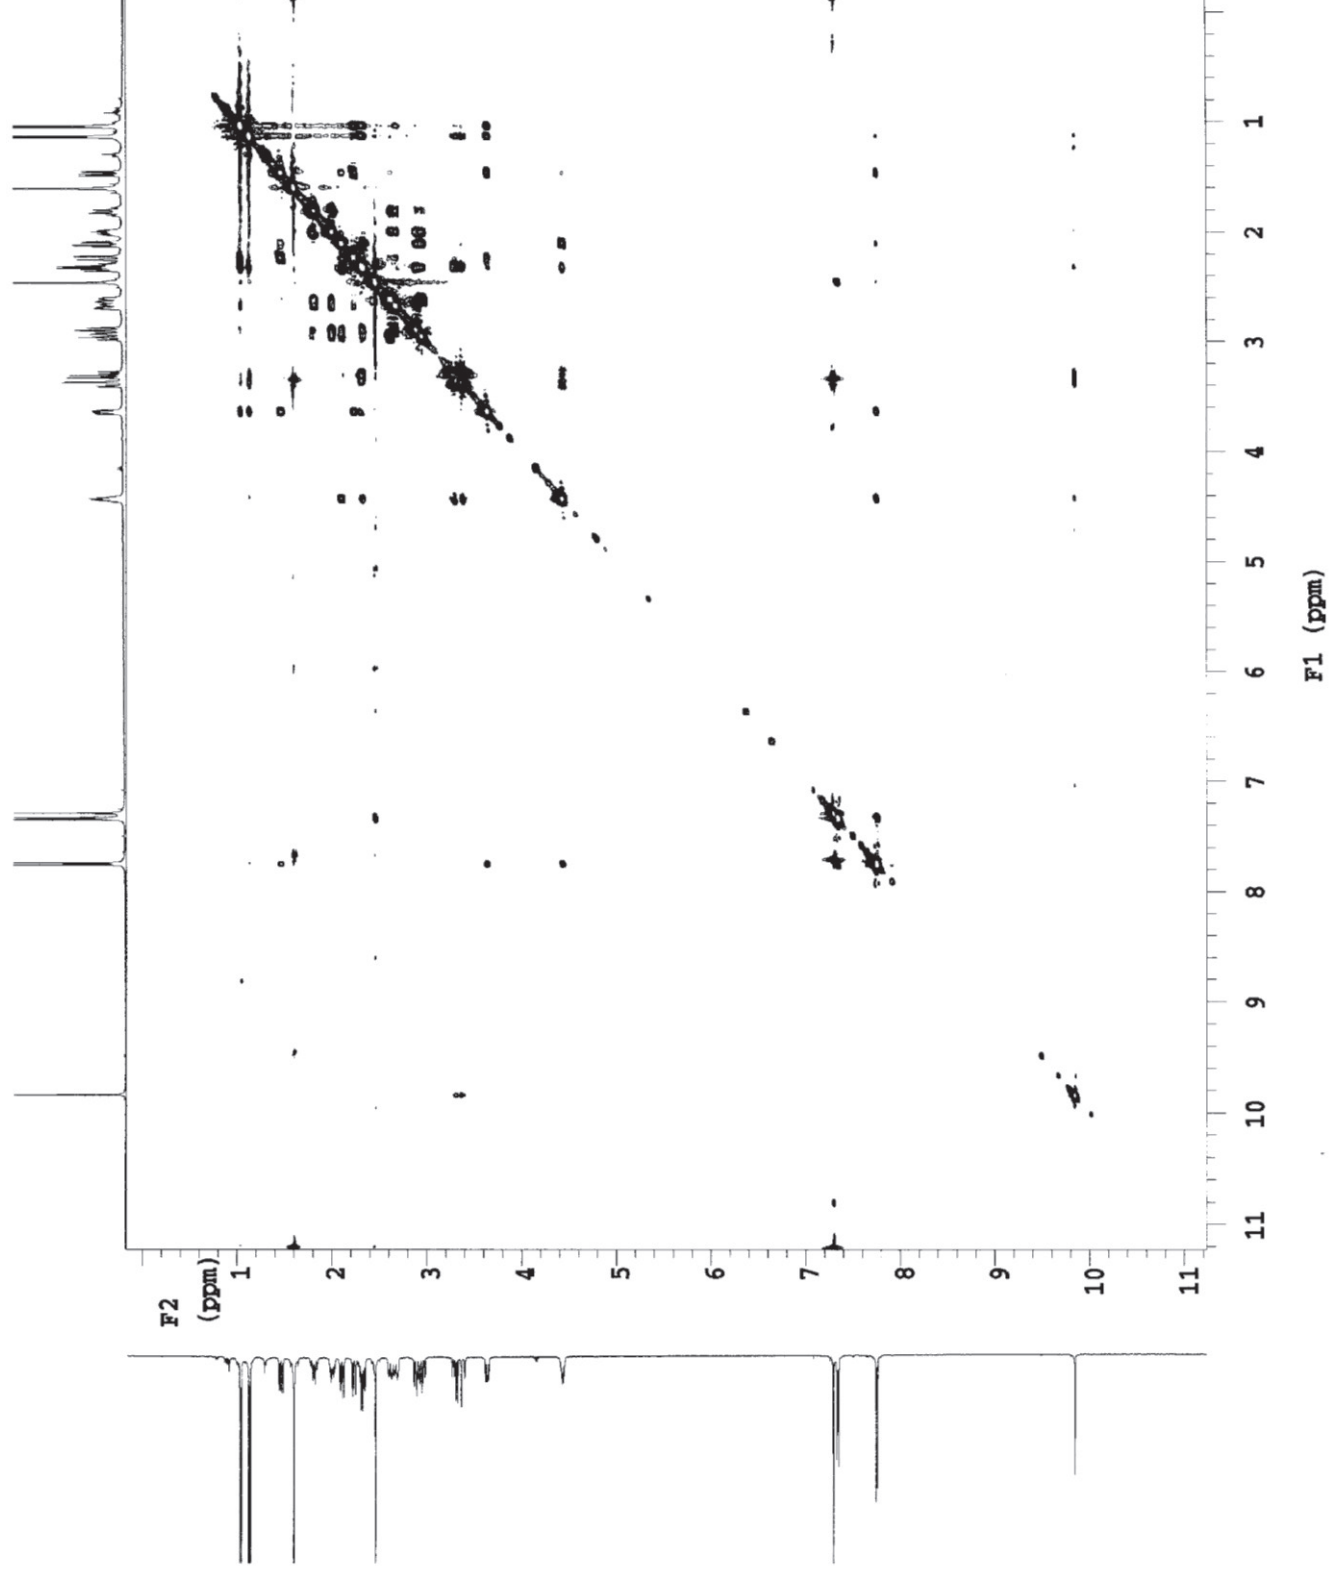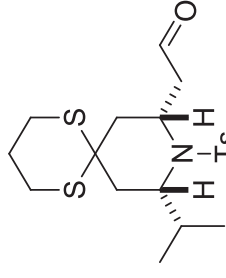

**9c**

500 MHz  $^1\text{H}$ - $^1\text{H}$  NOESY NMR

$\text{CDCl}_3$

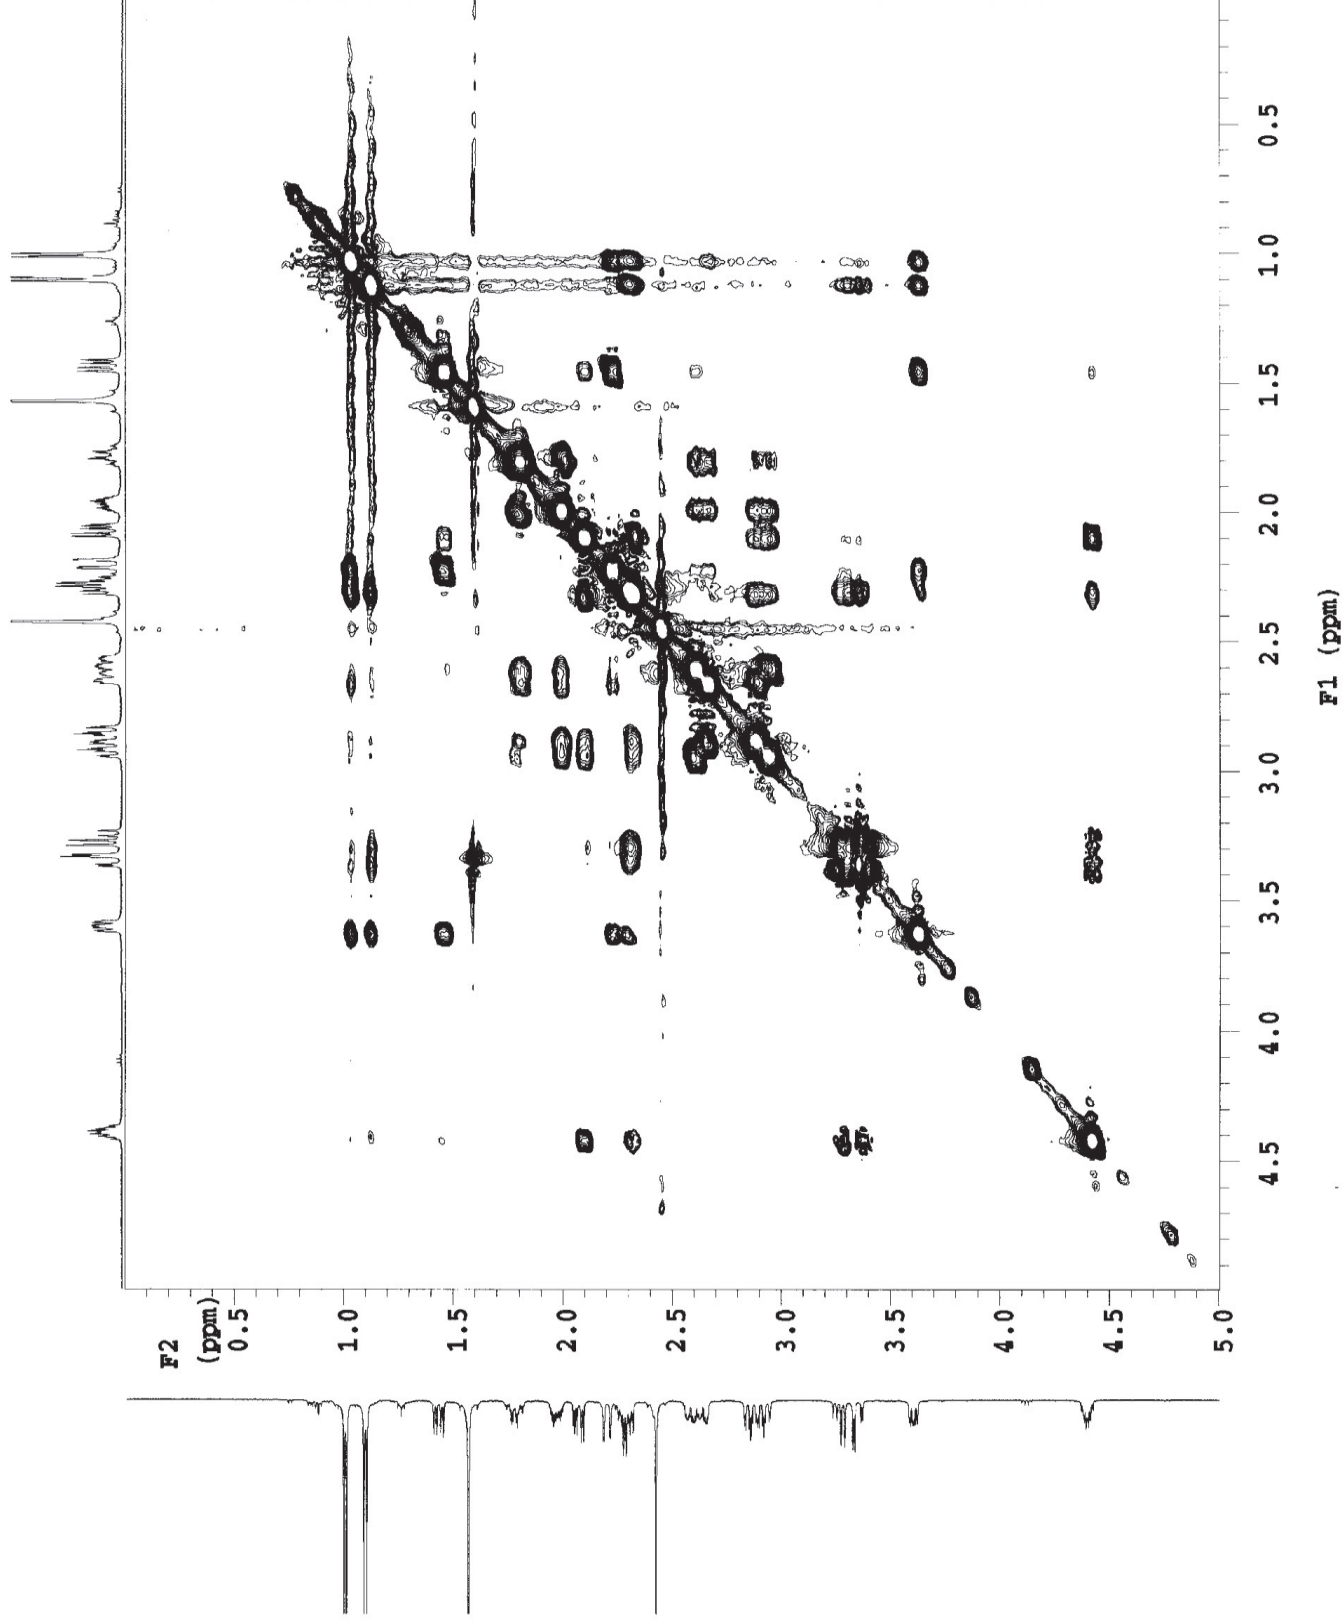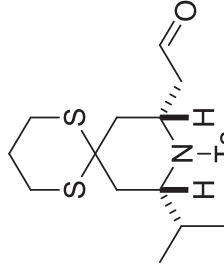

**9c**

500 MHz  $^1\text{H}$ - $^1\text{H}$  NOESY NMR

$\text{CDCl}_3$



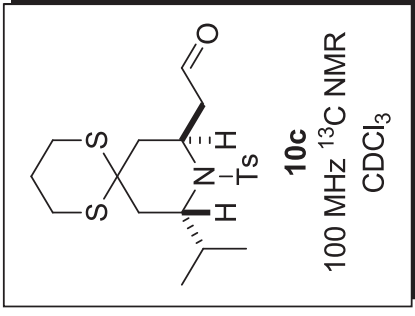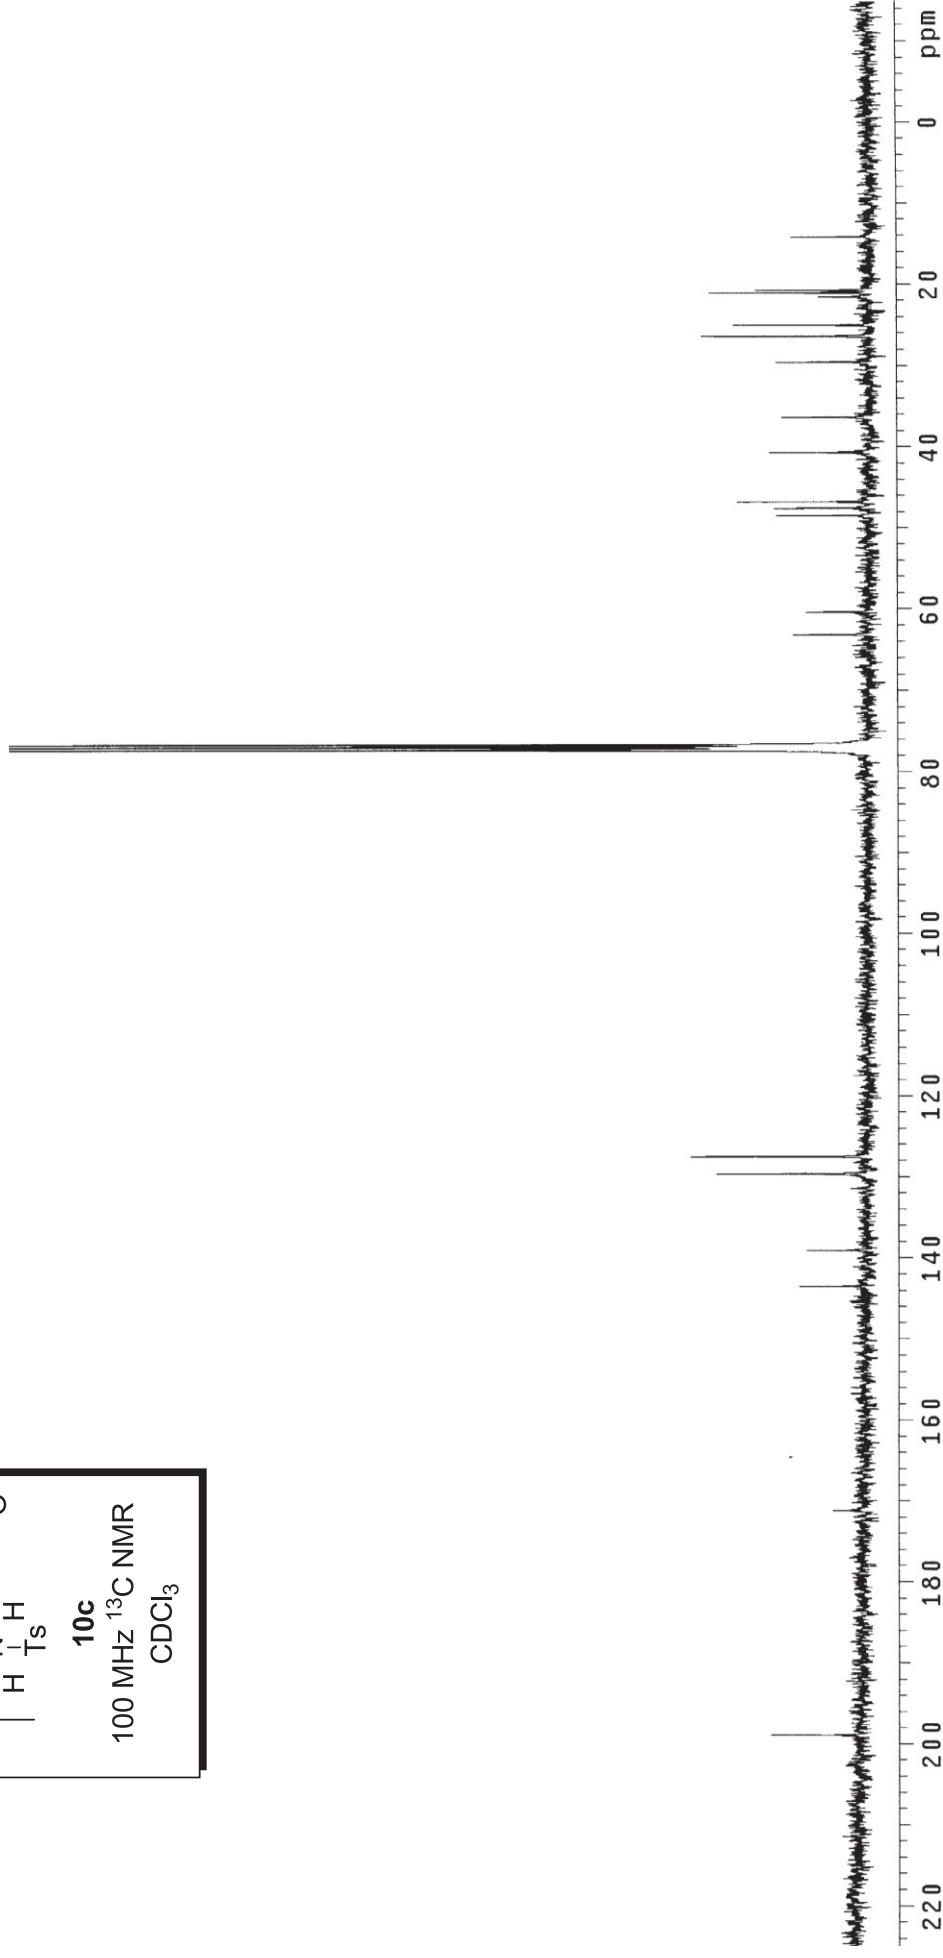

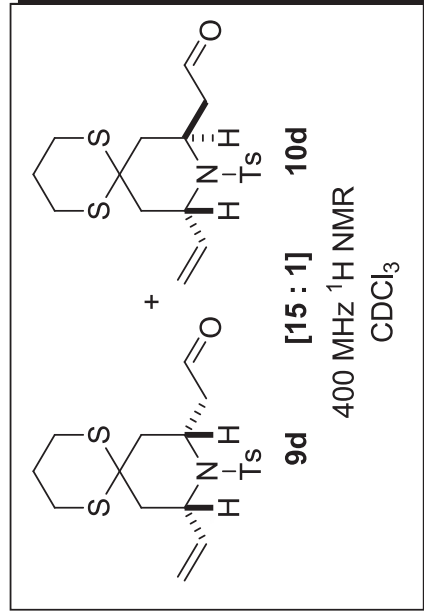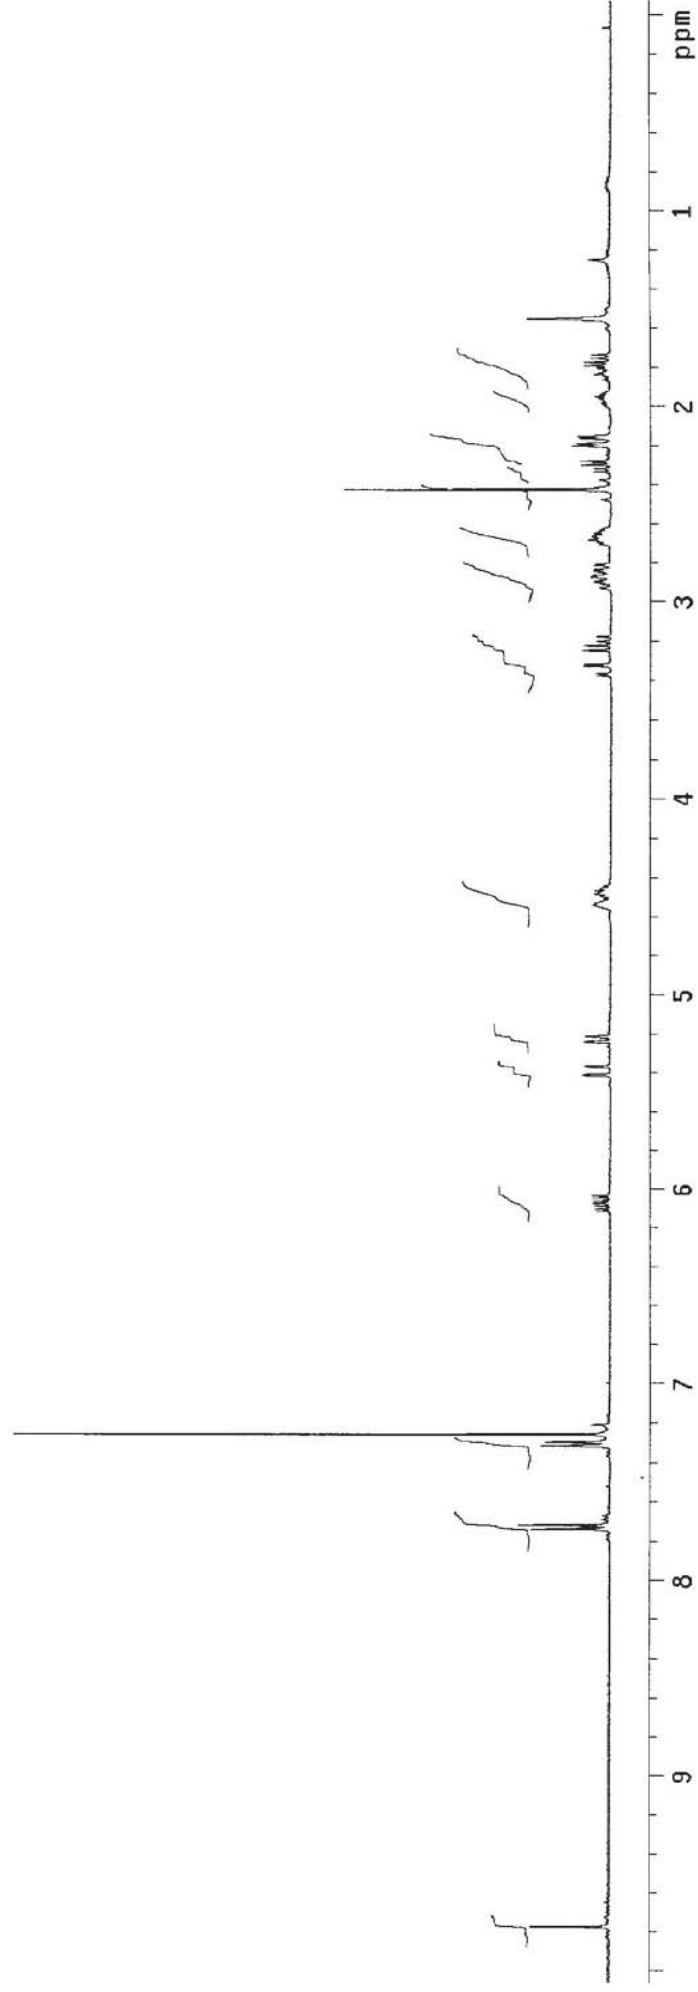

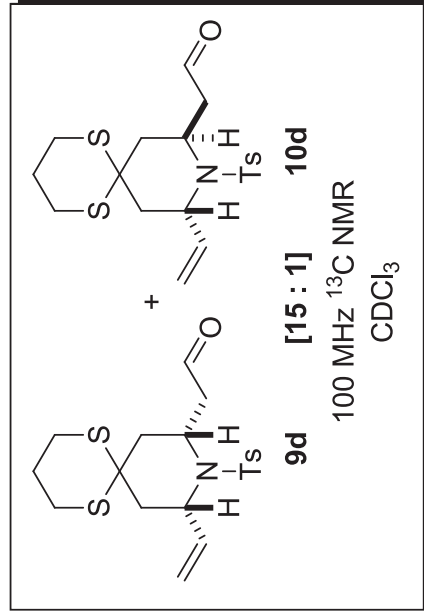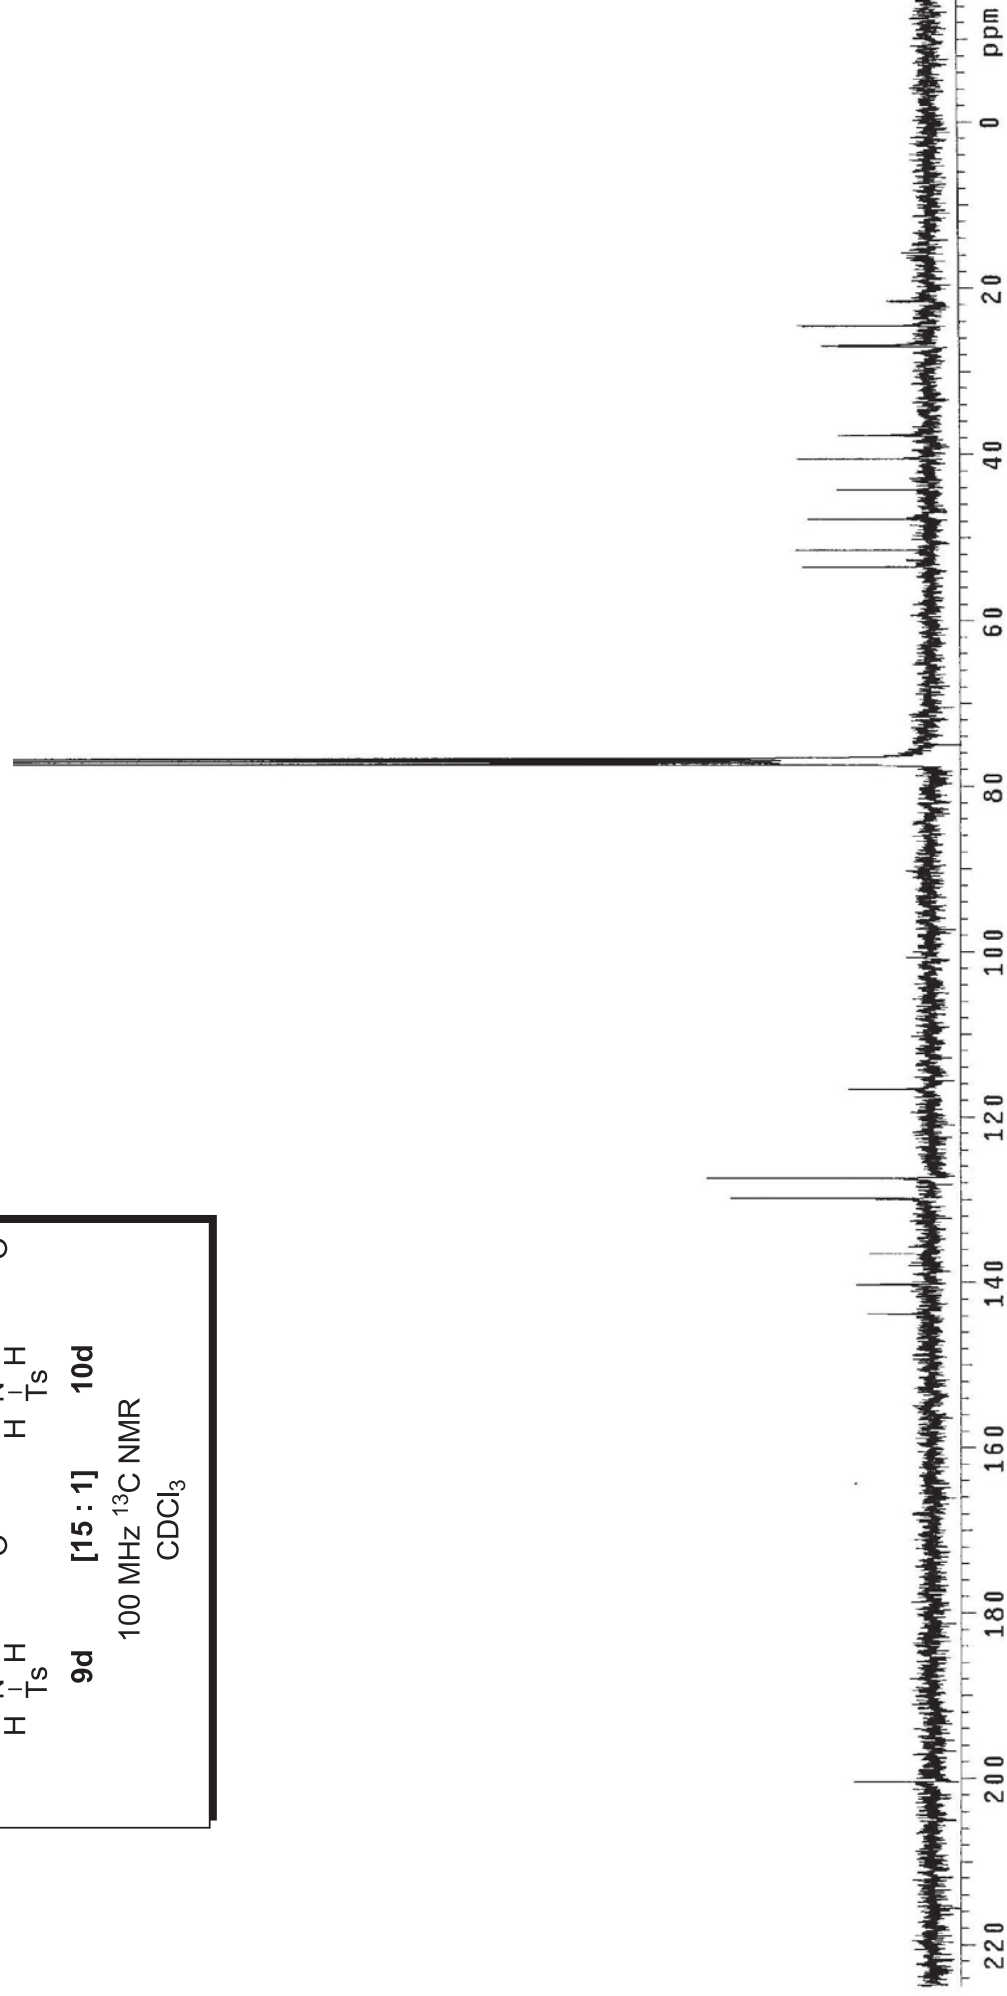



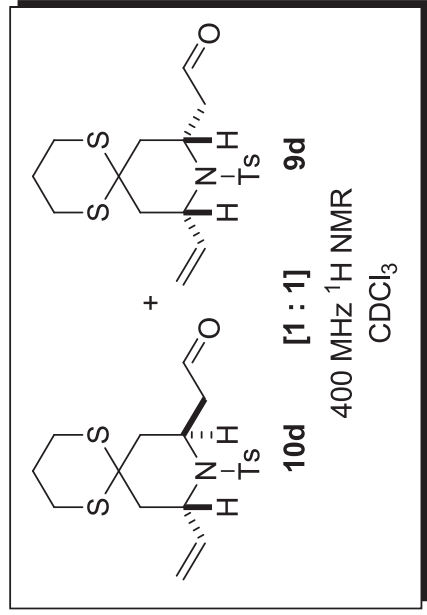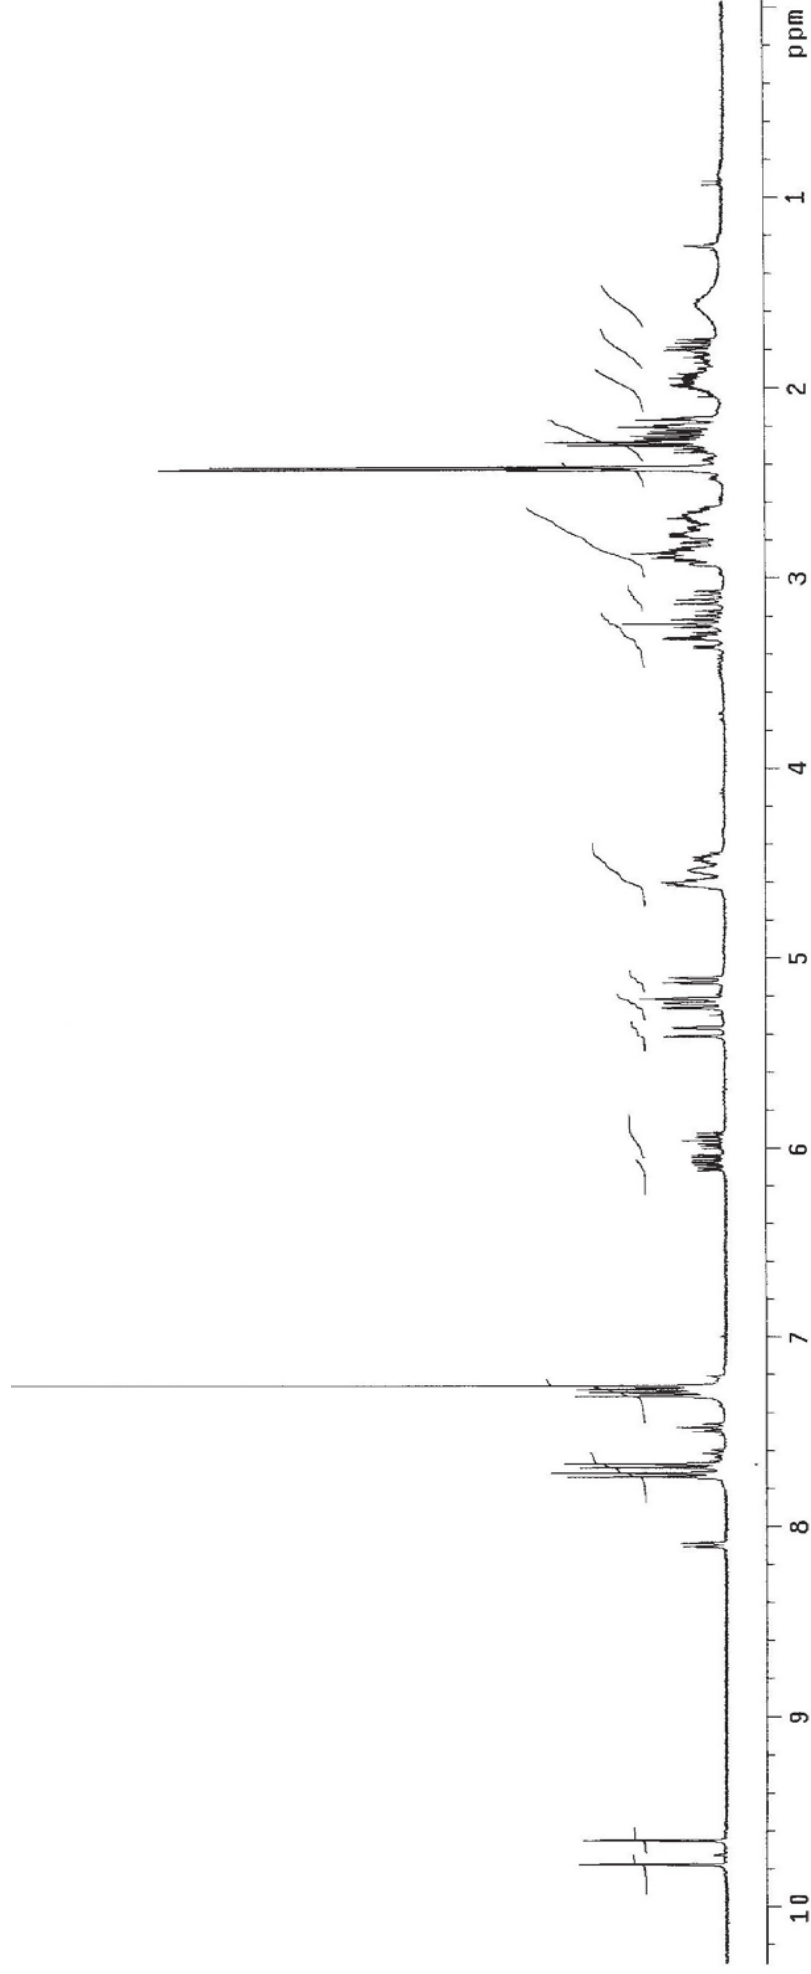

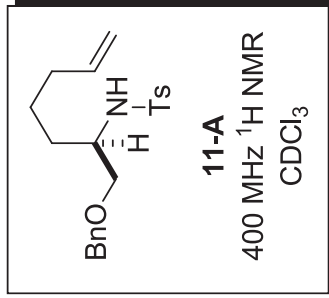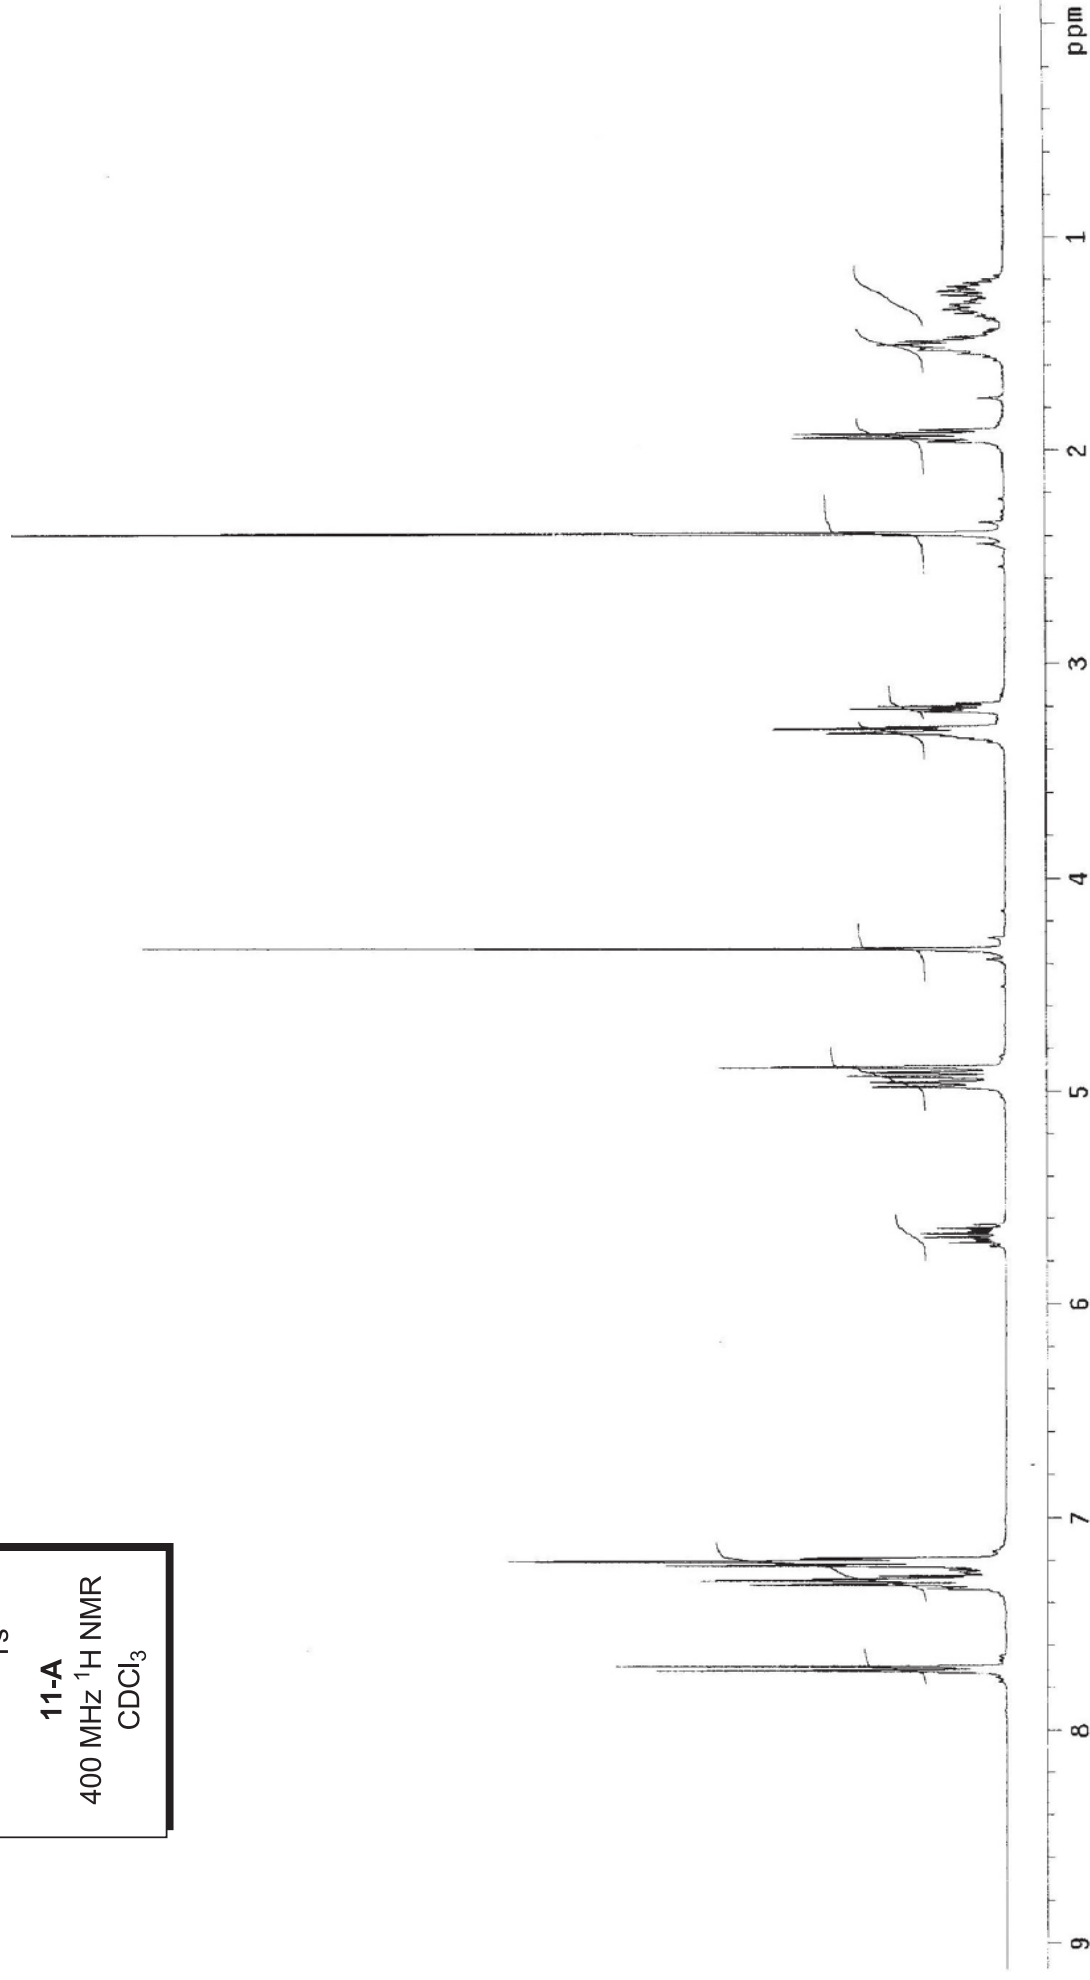

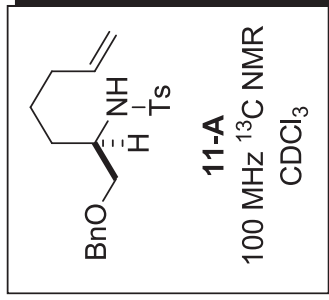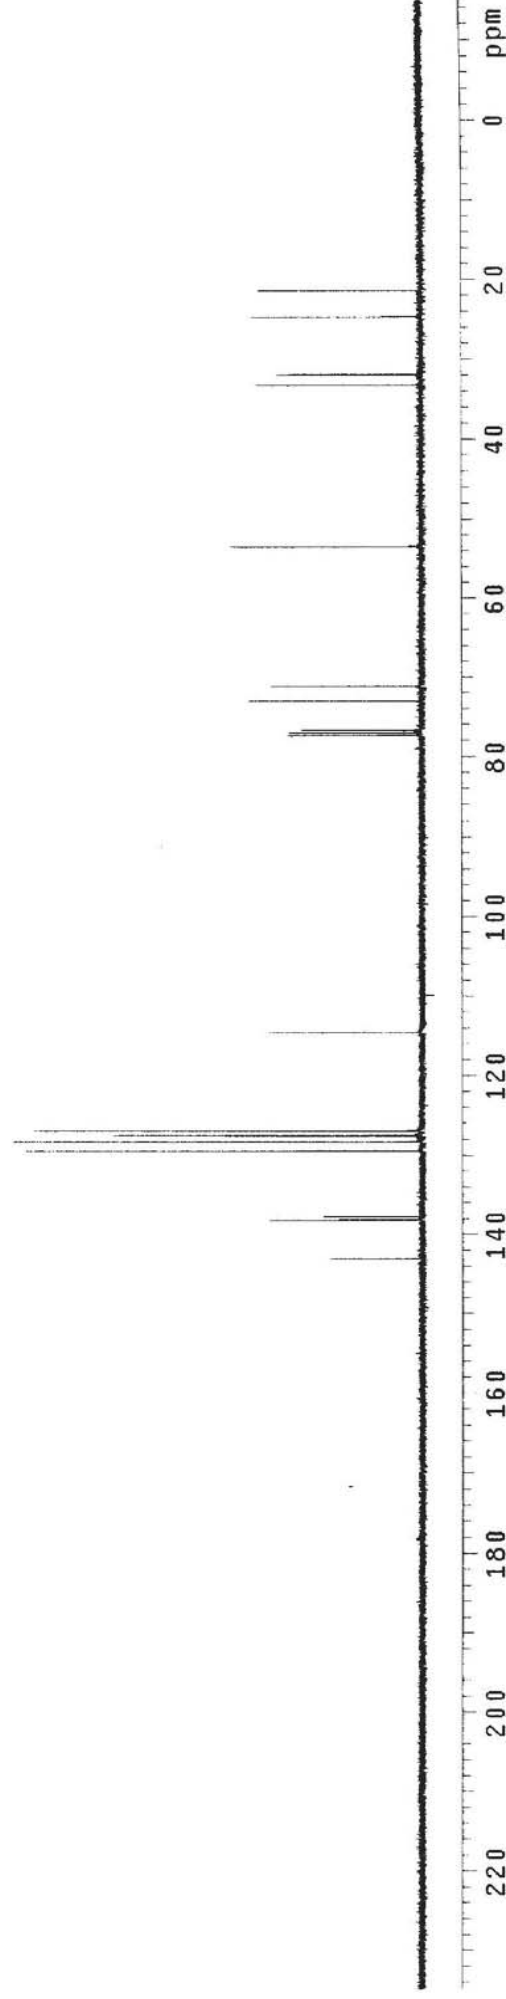

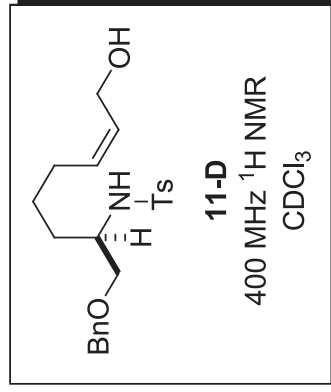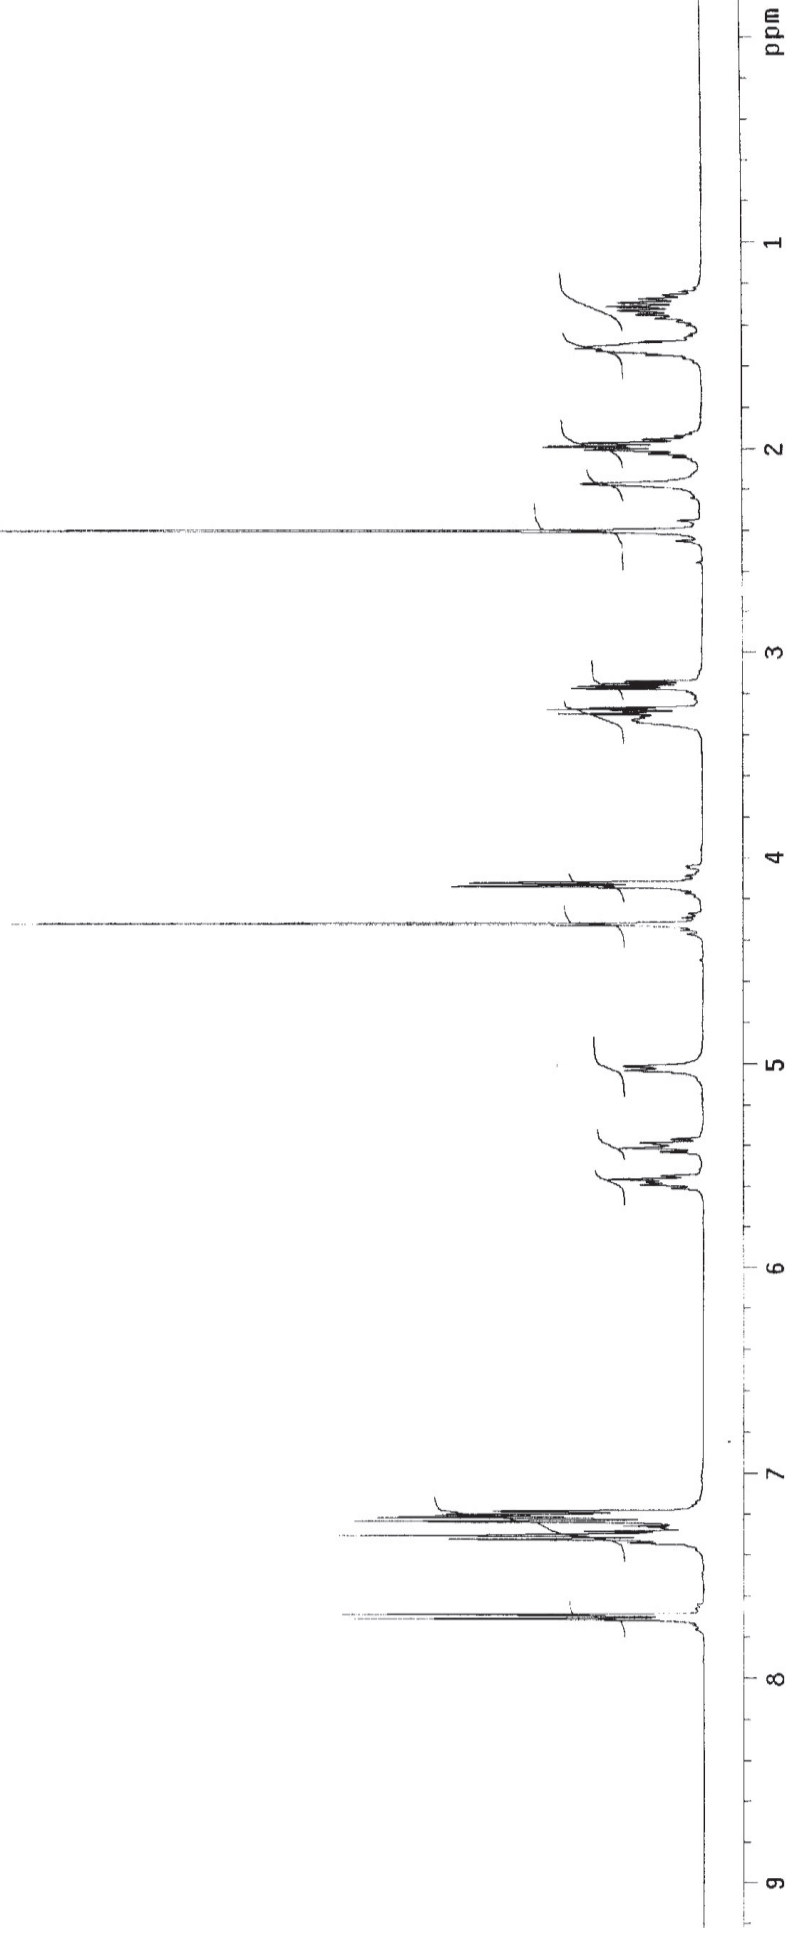

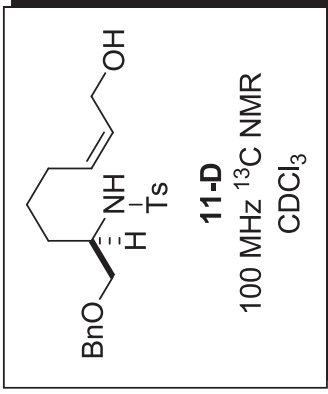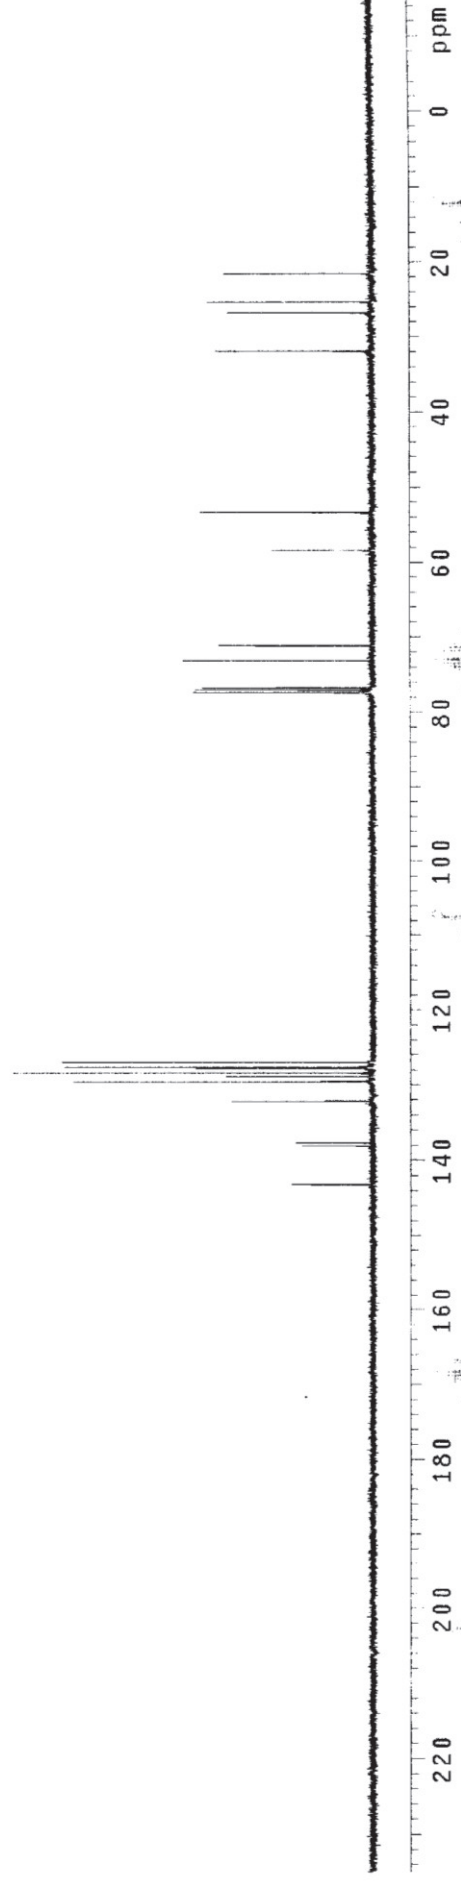

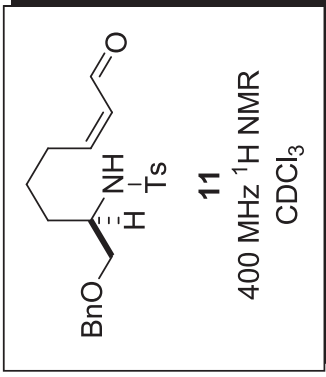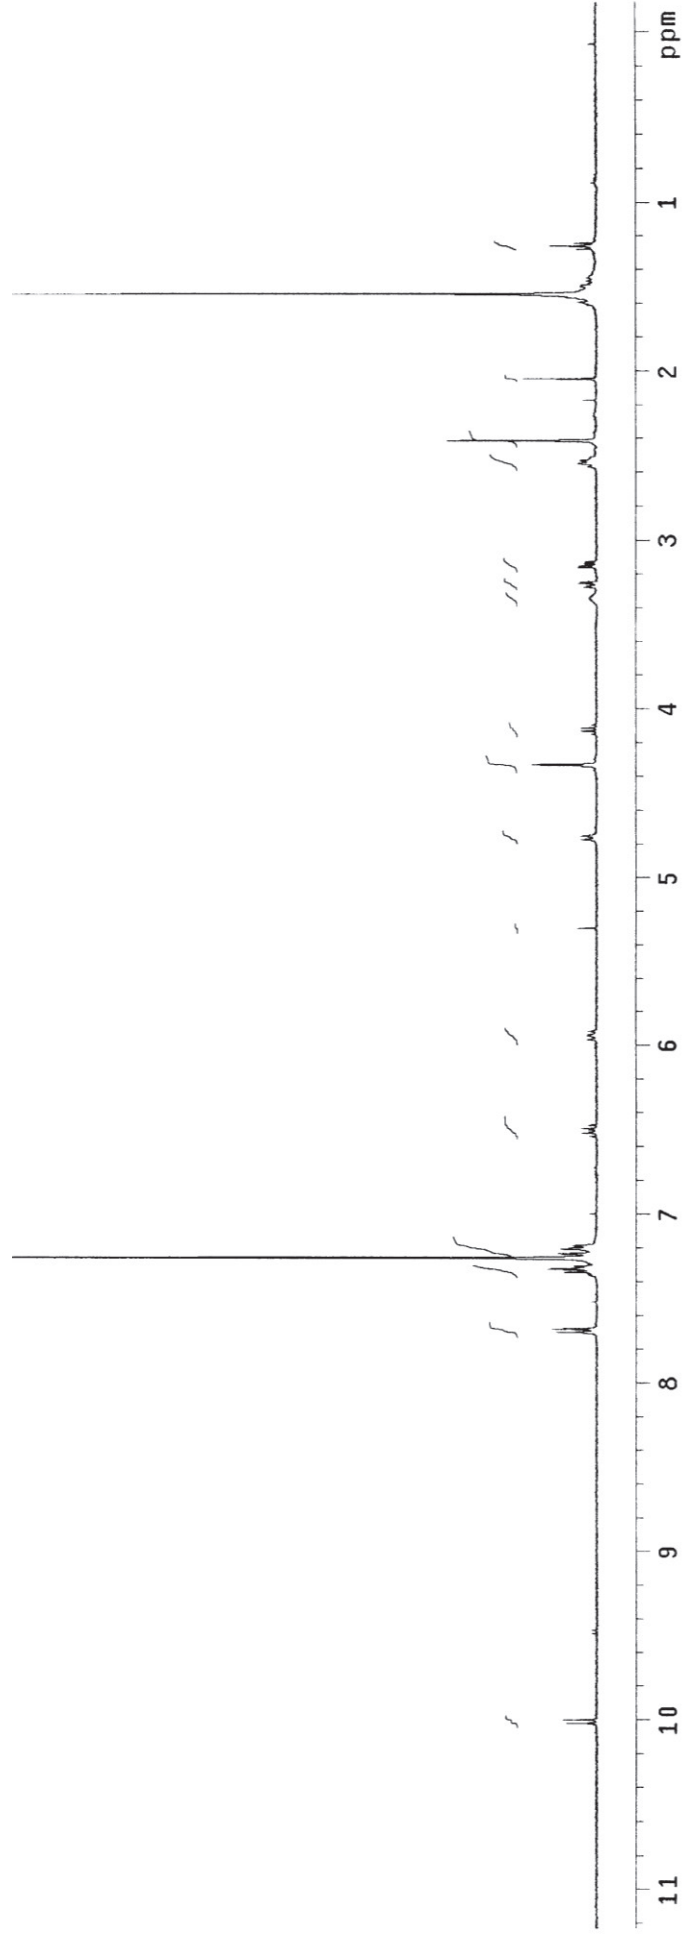

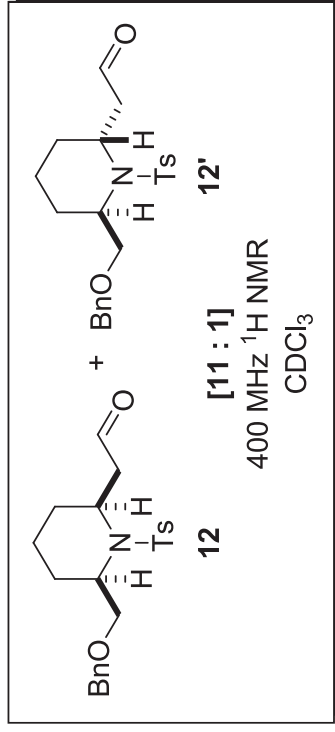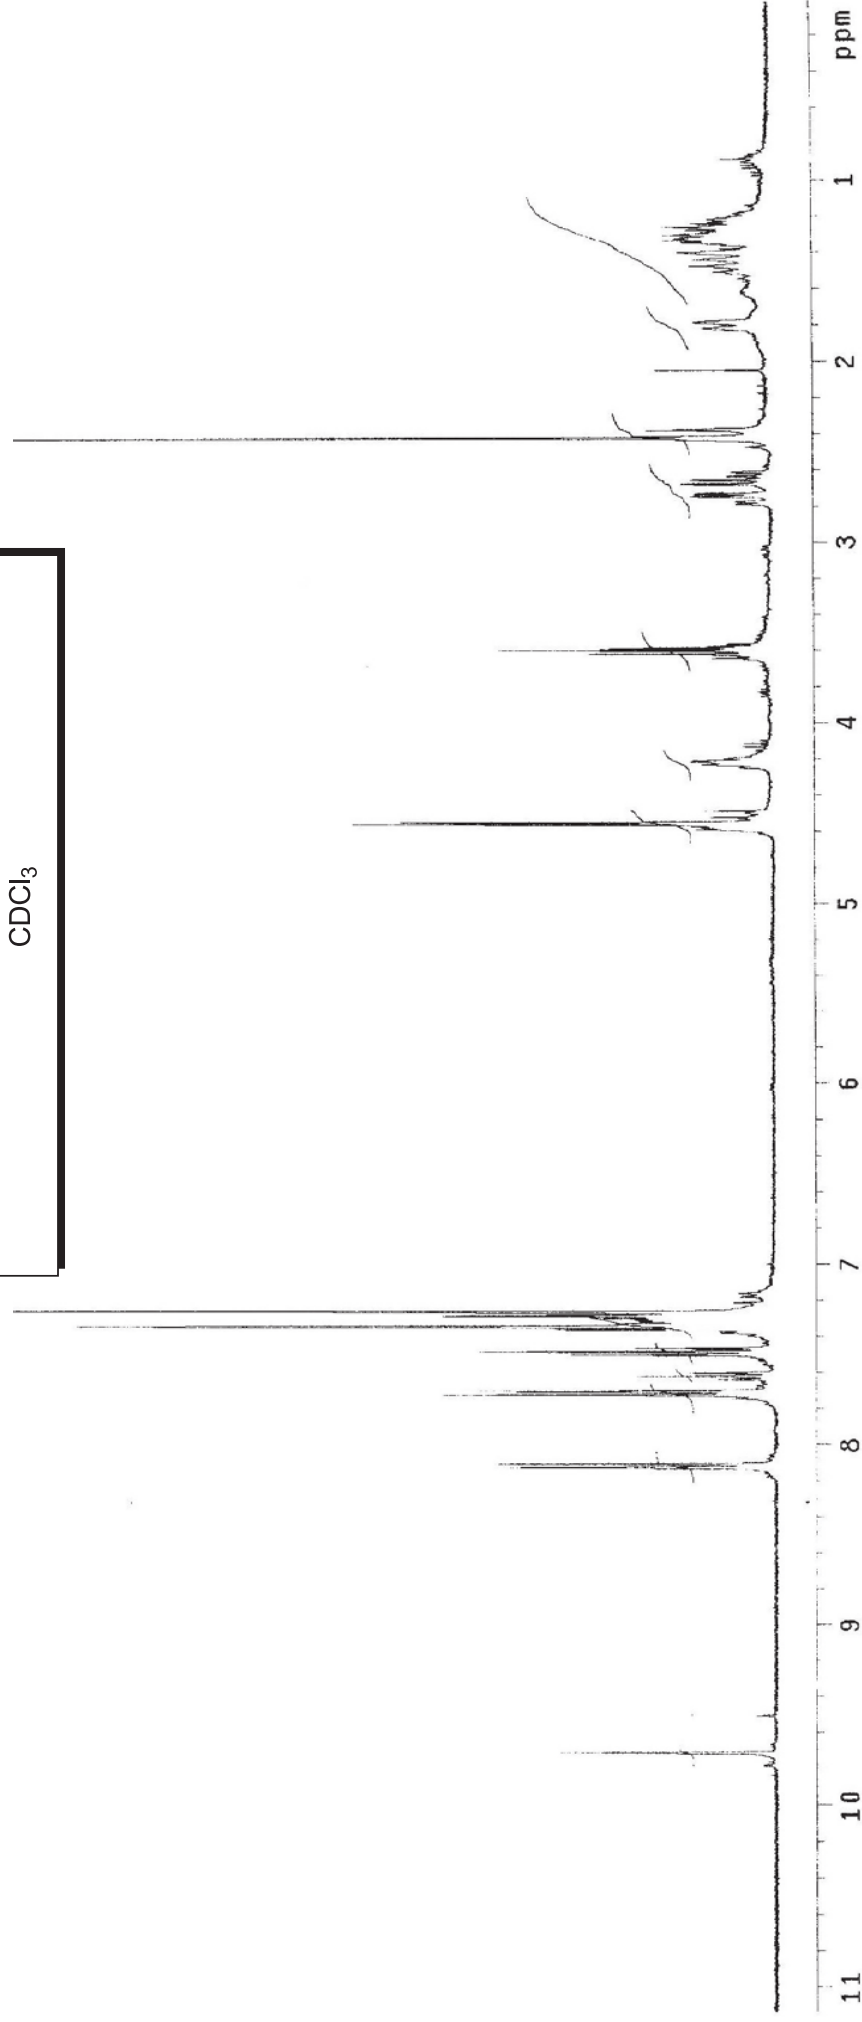

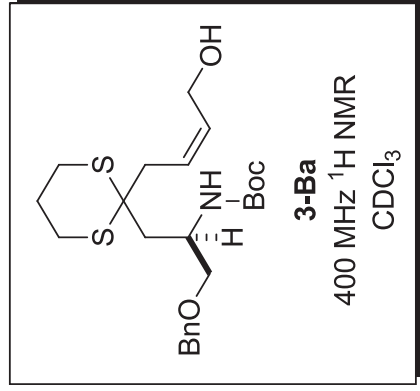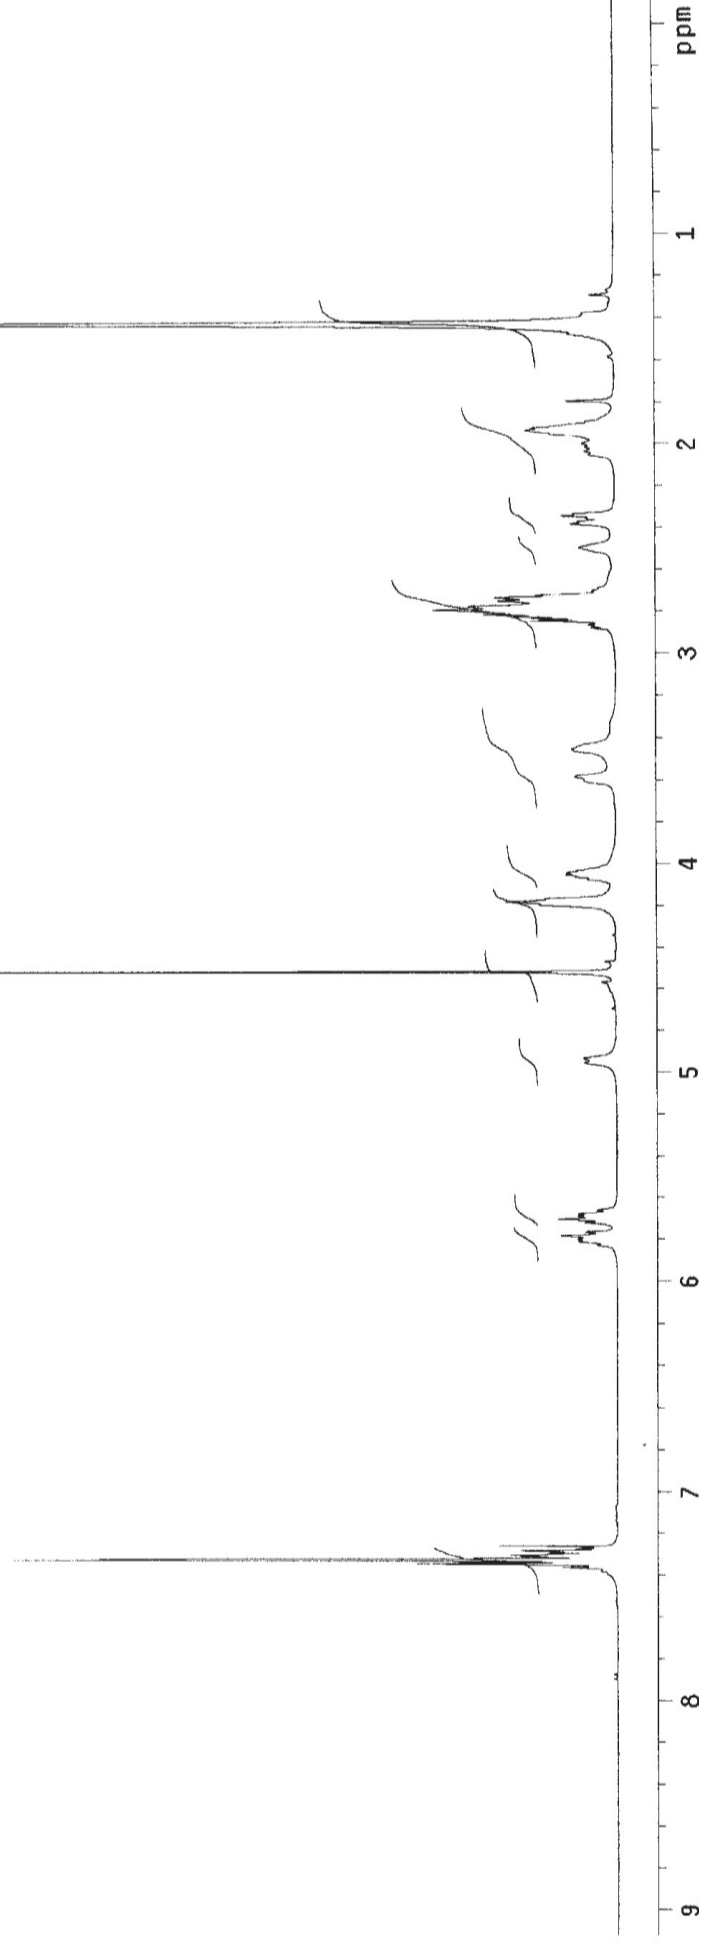



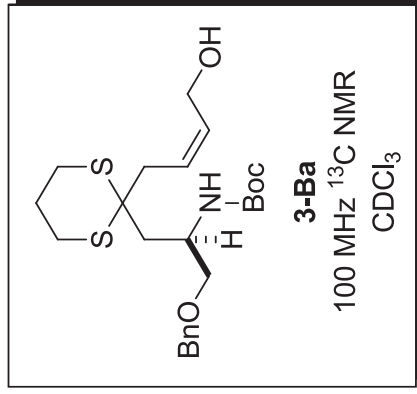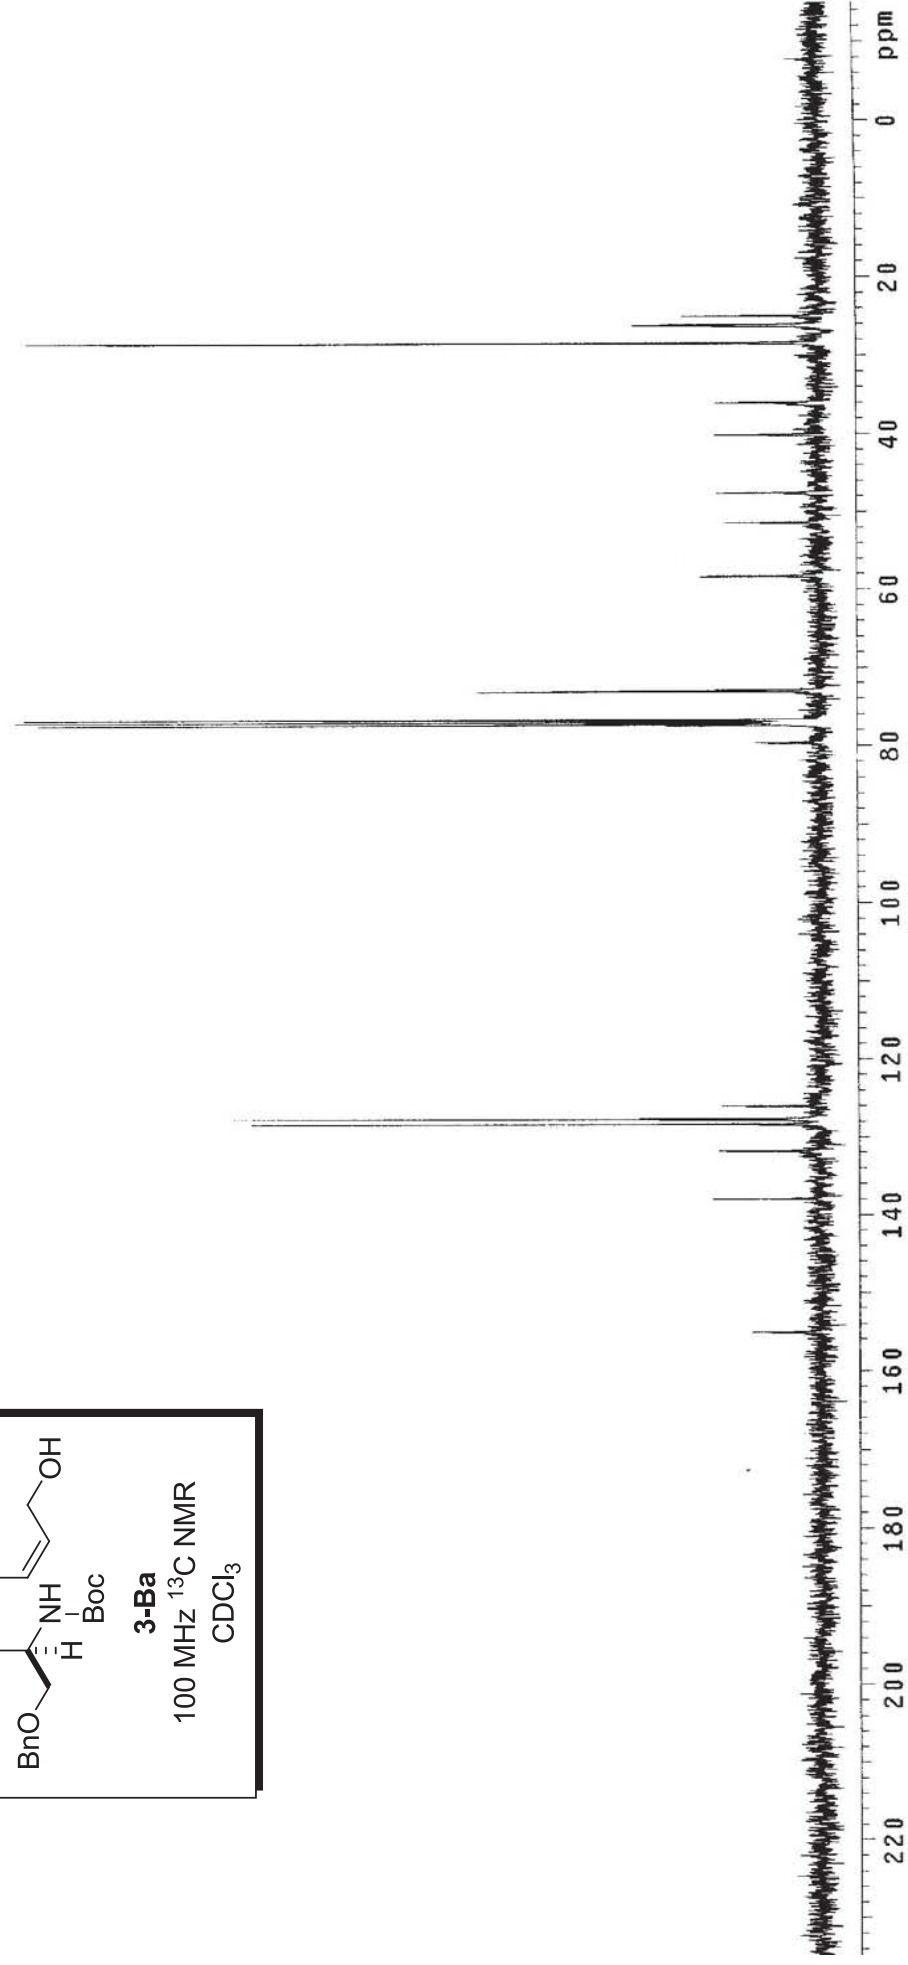

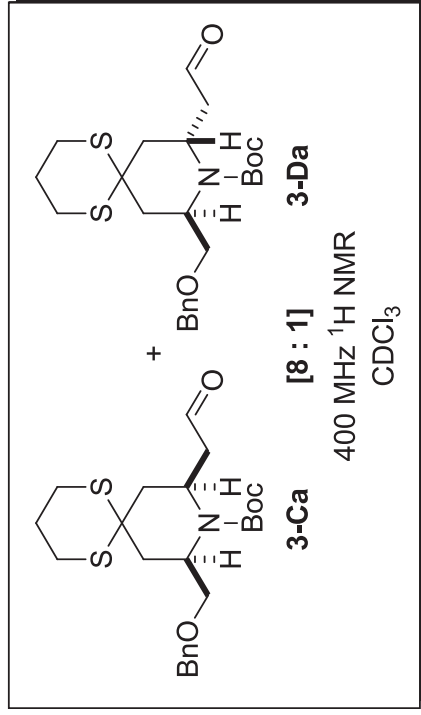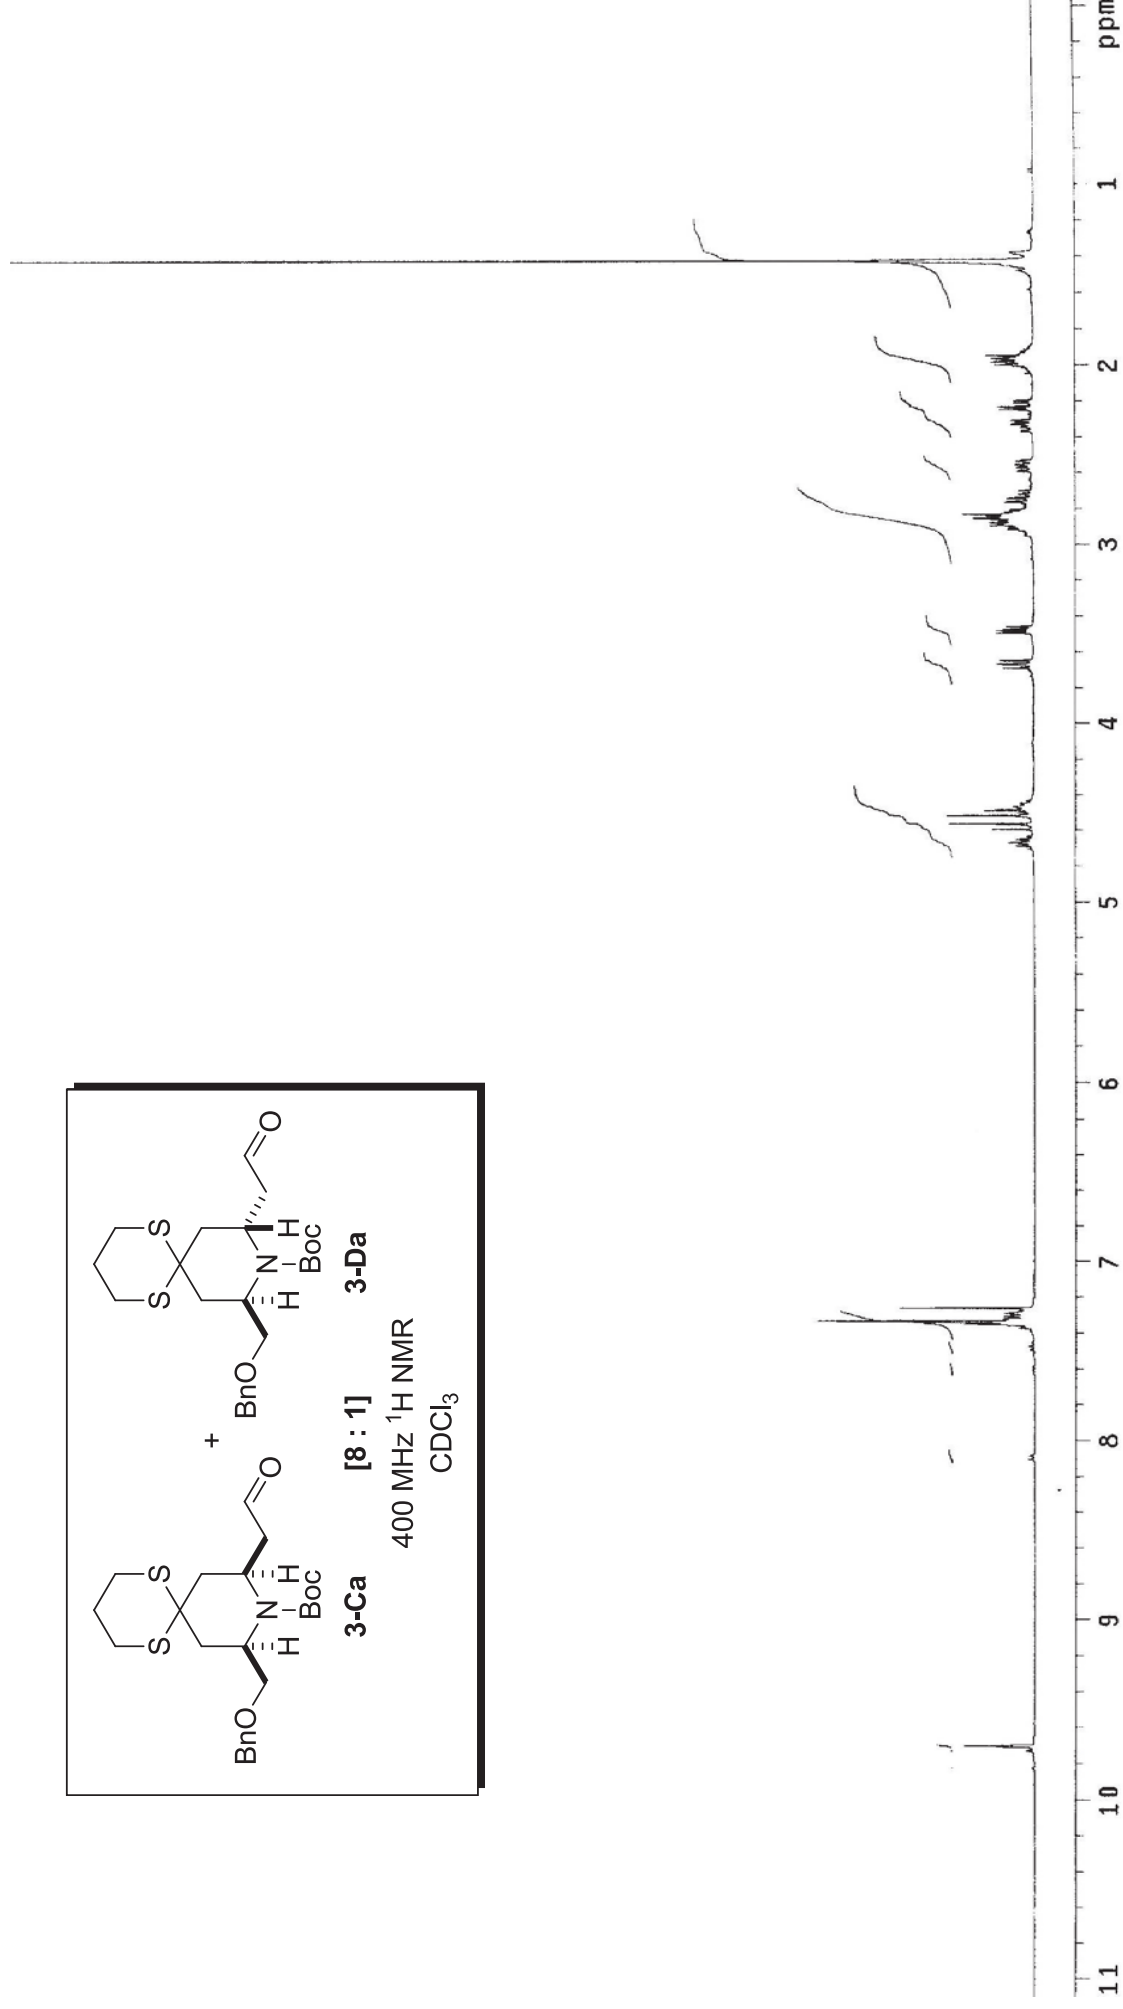

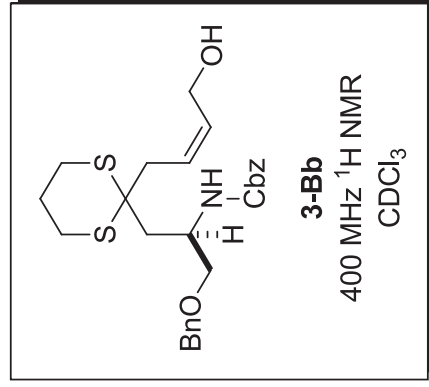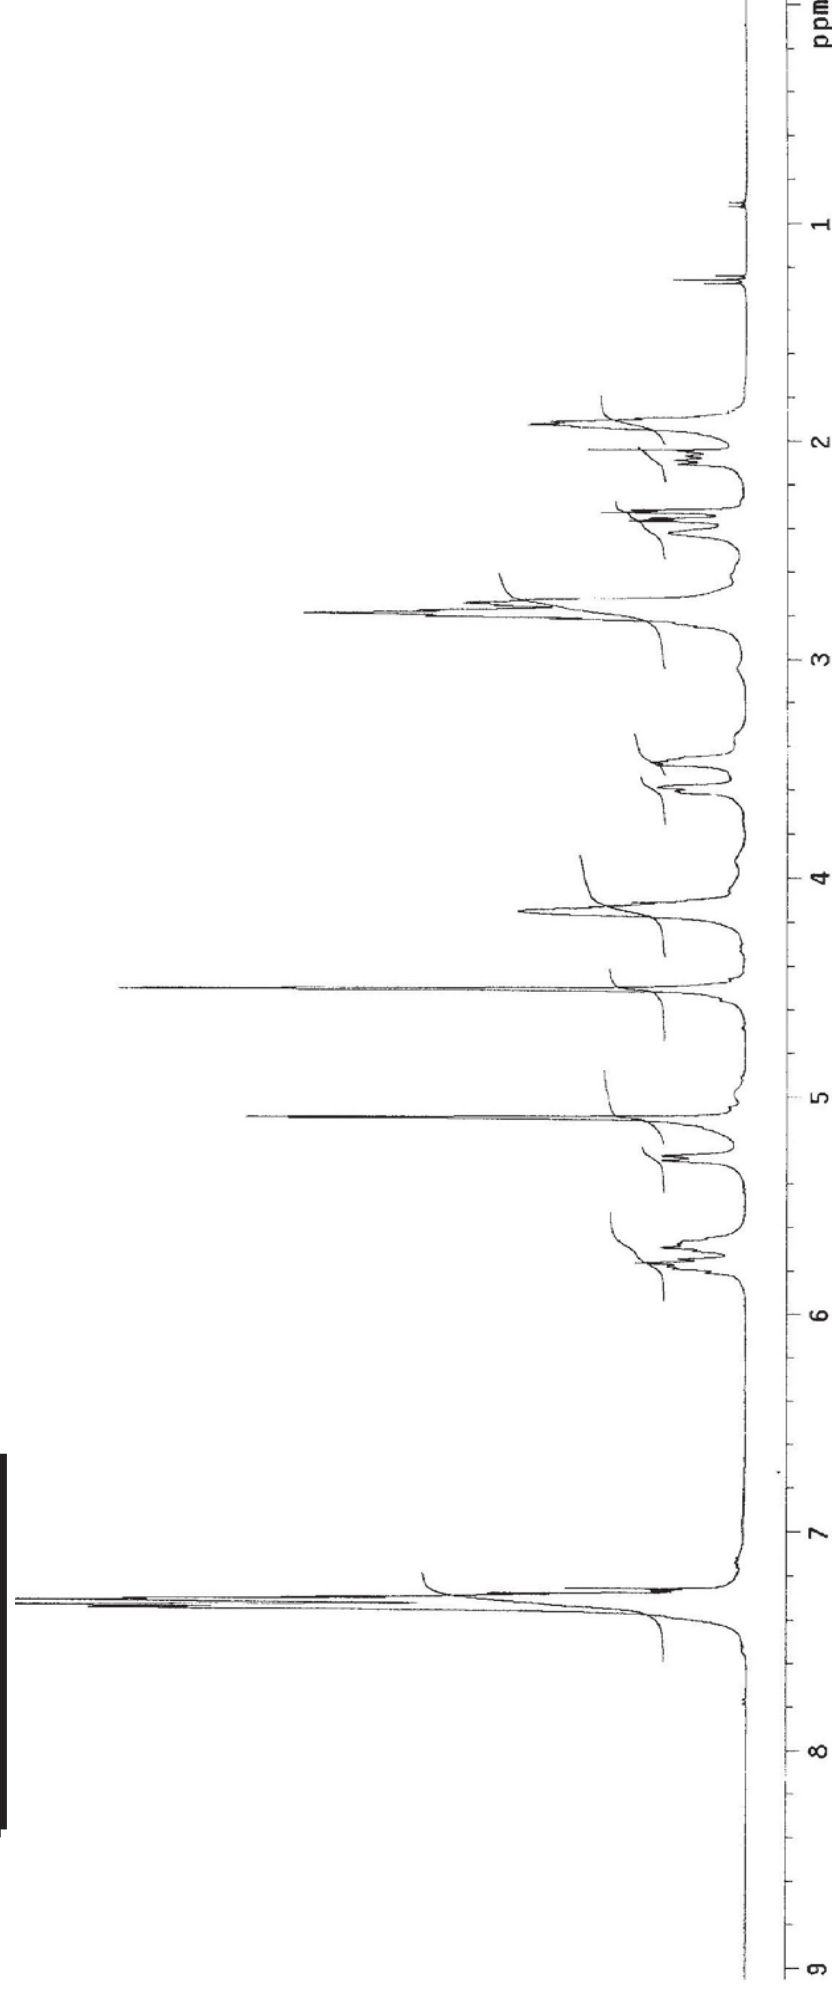

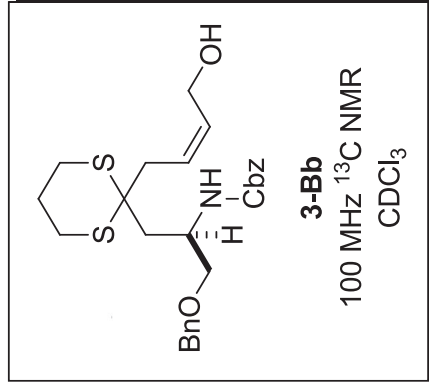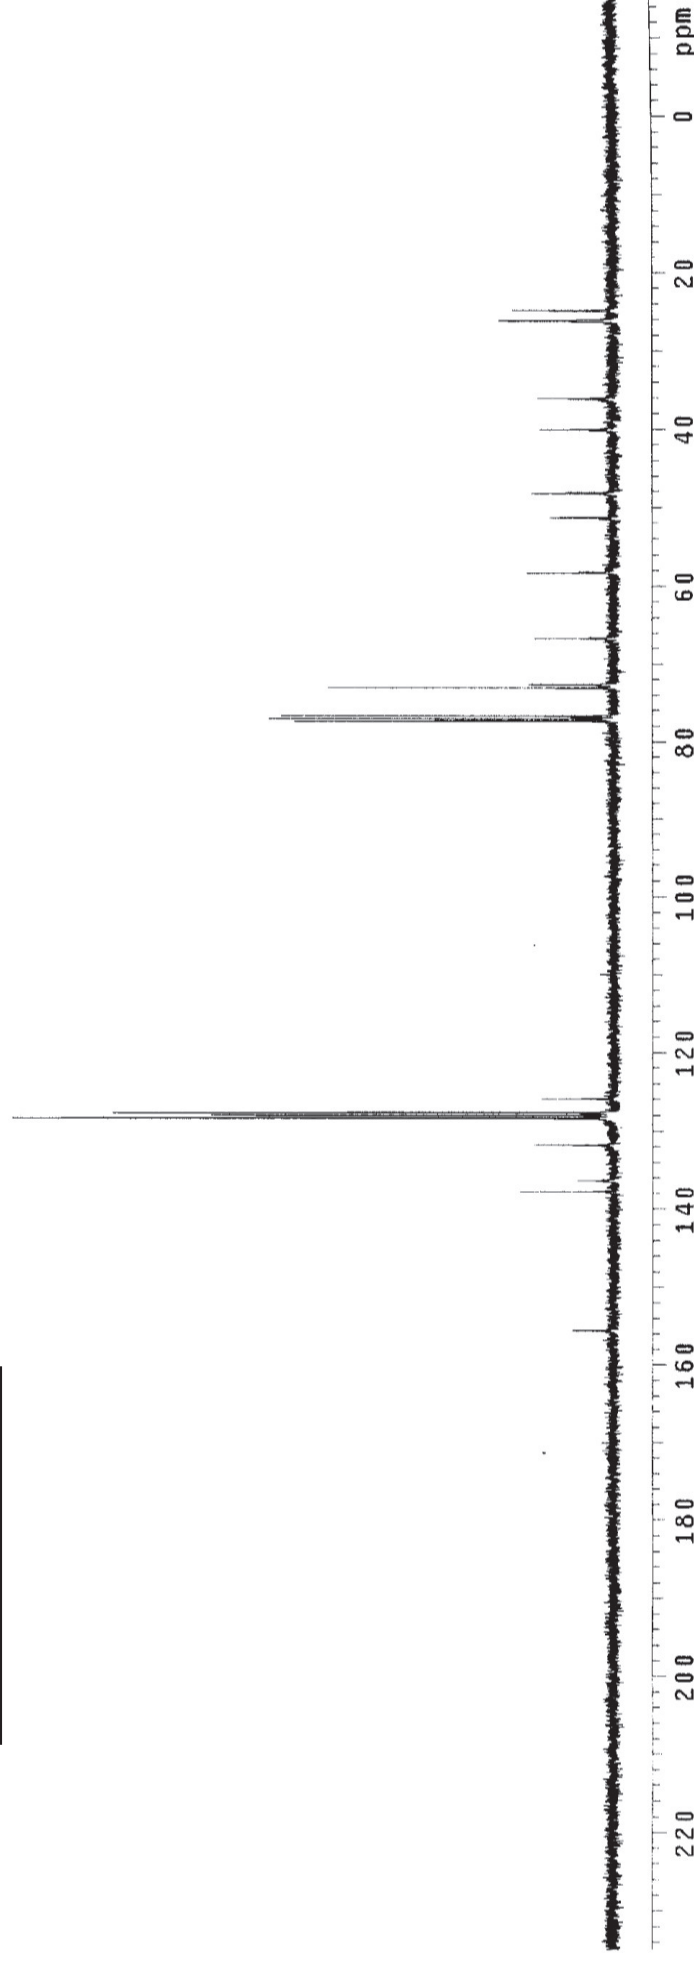

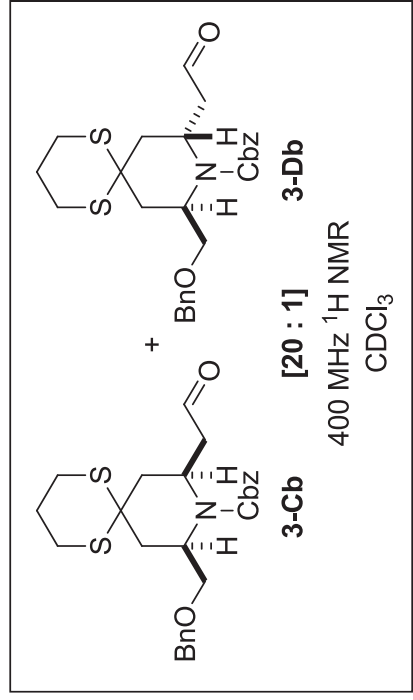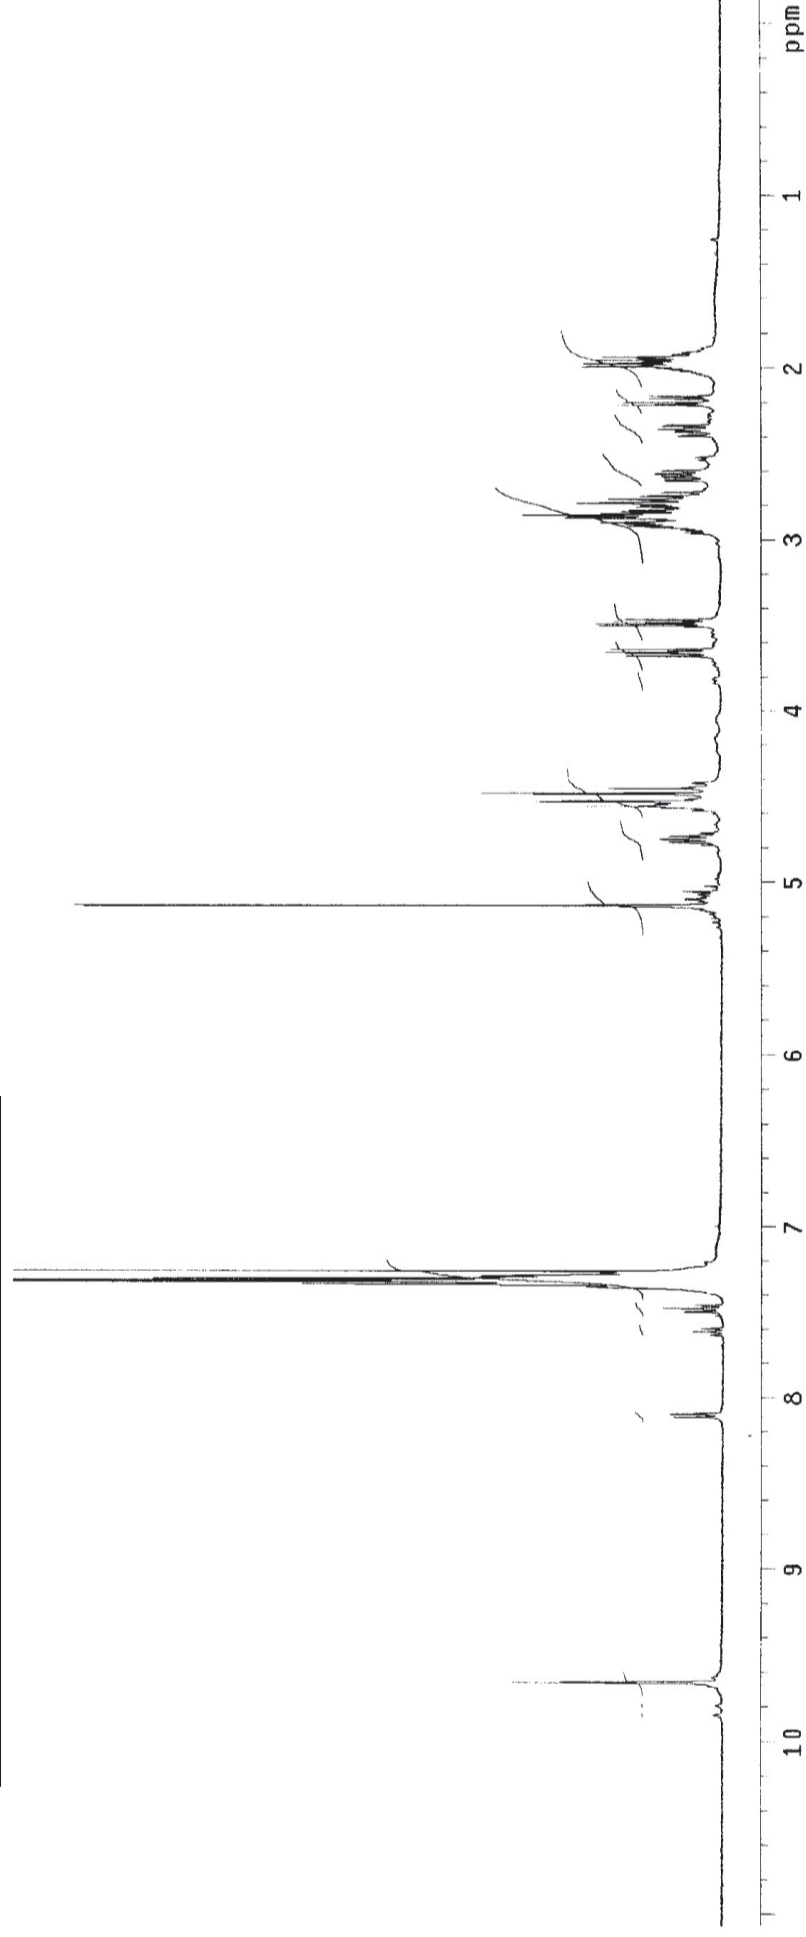

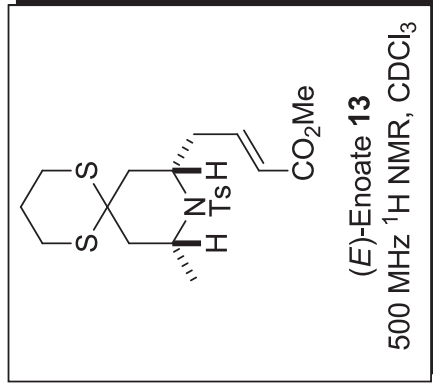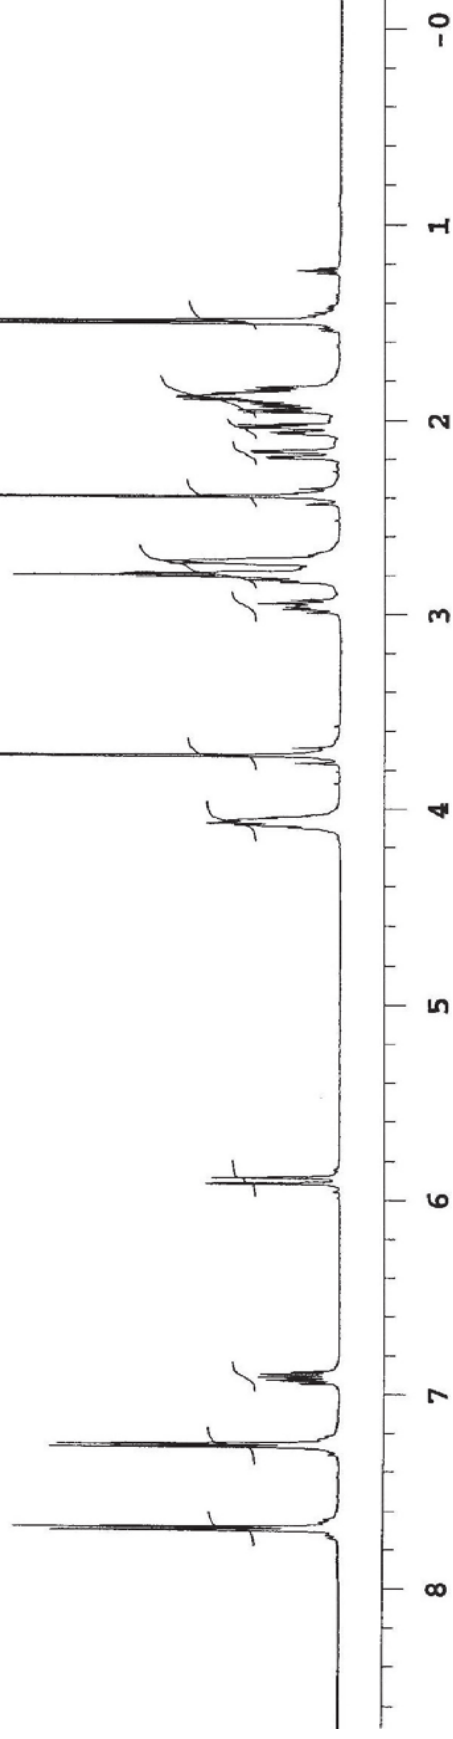

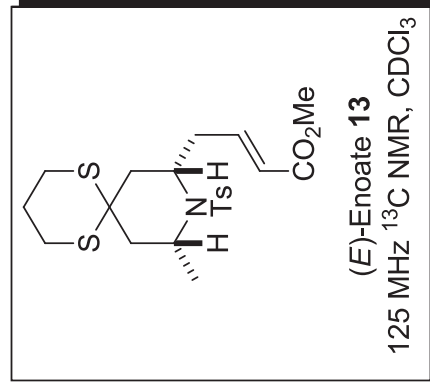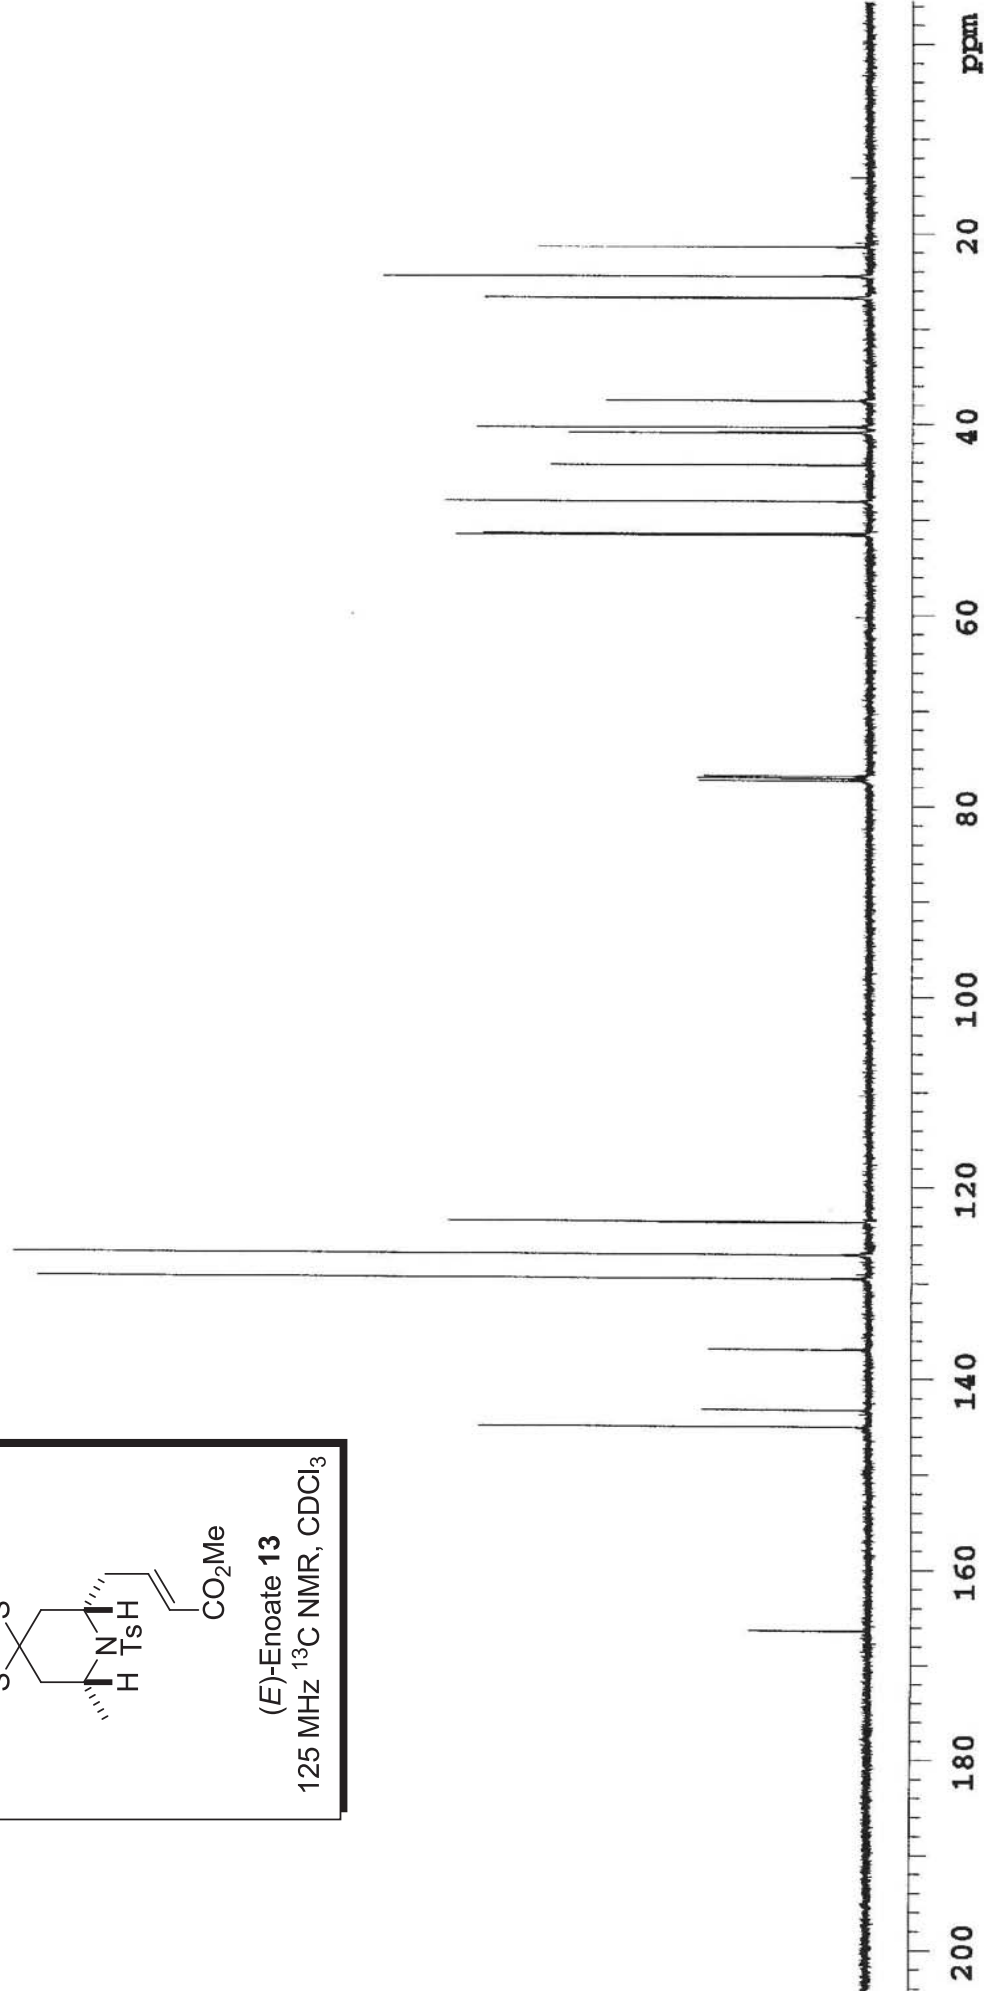

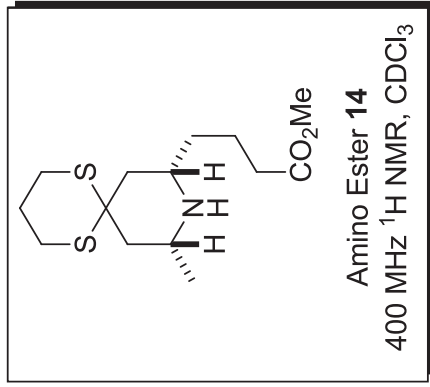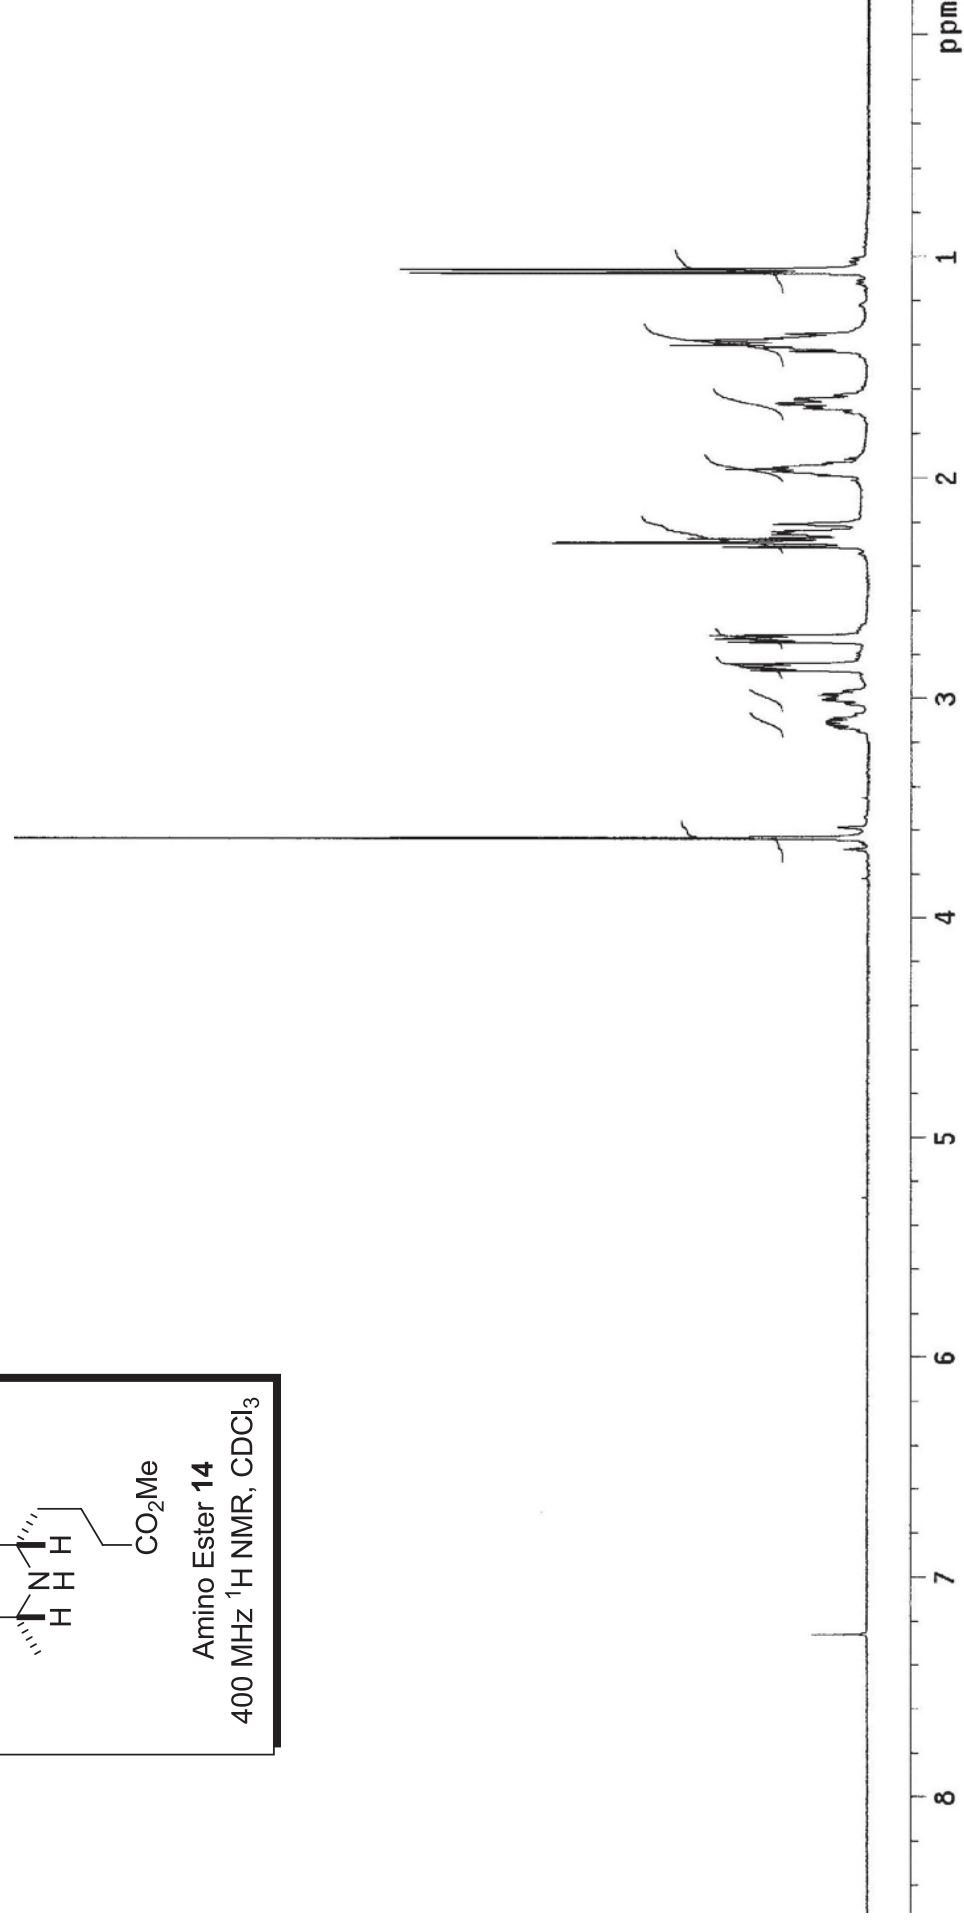



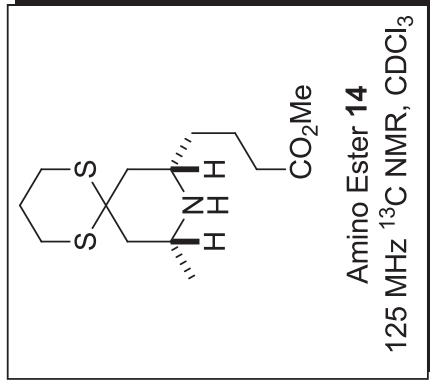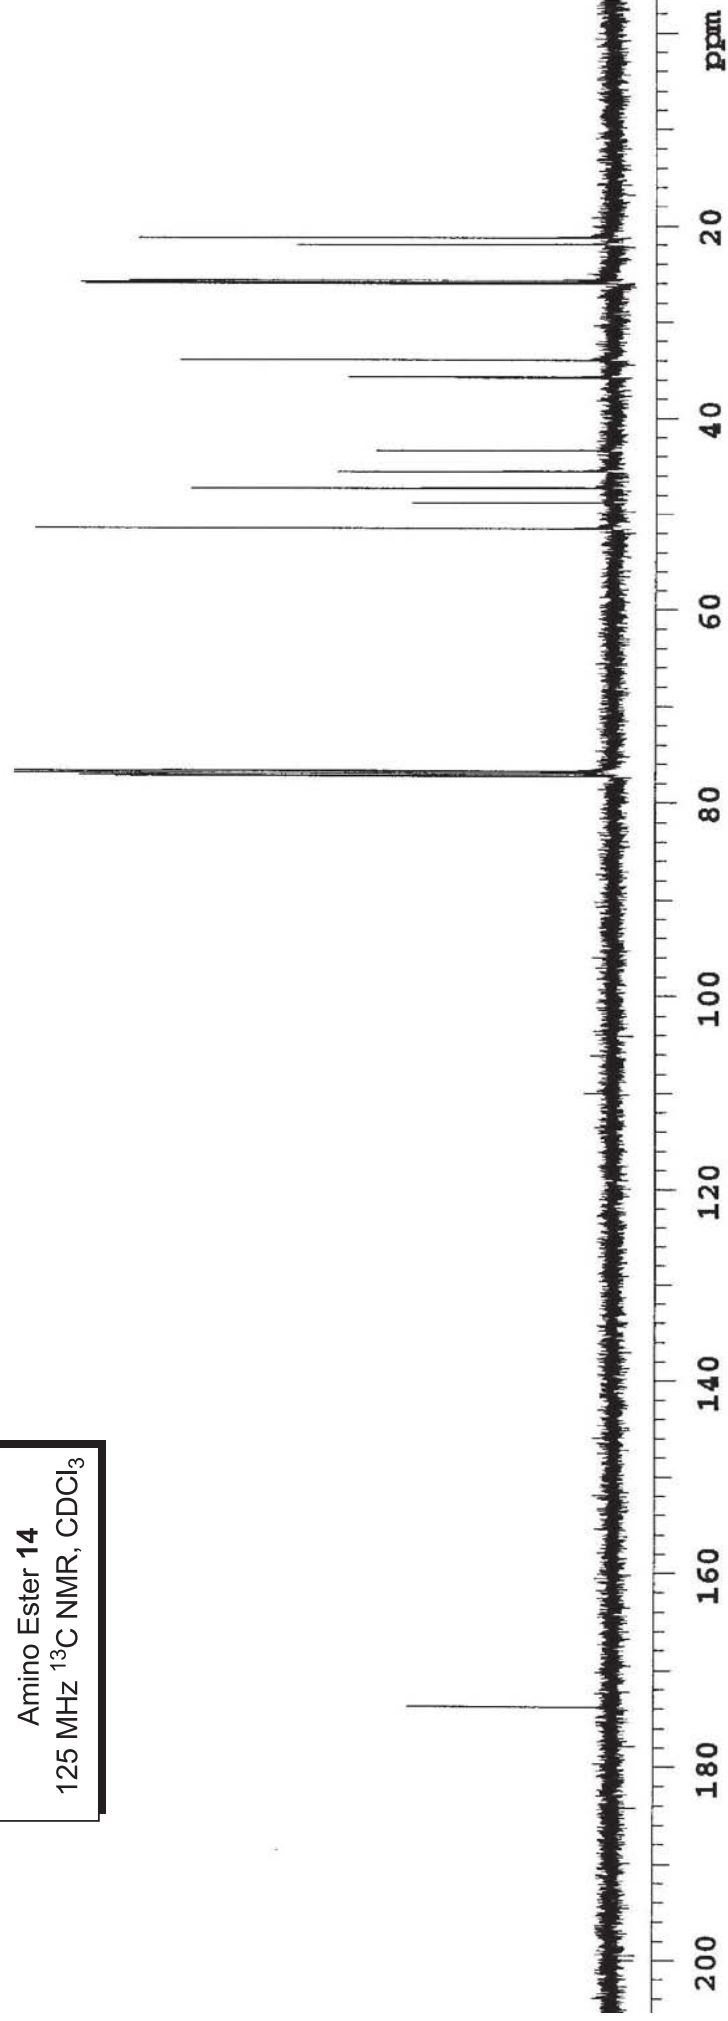

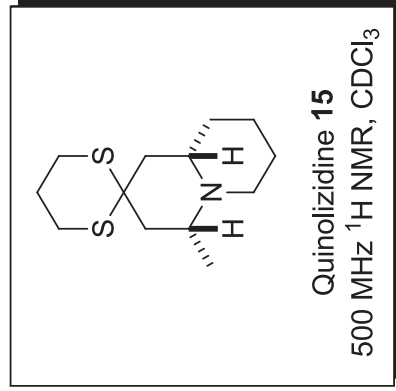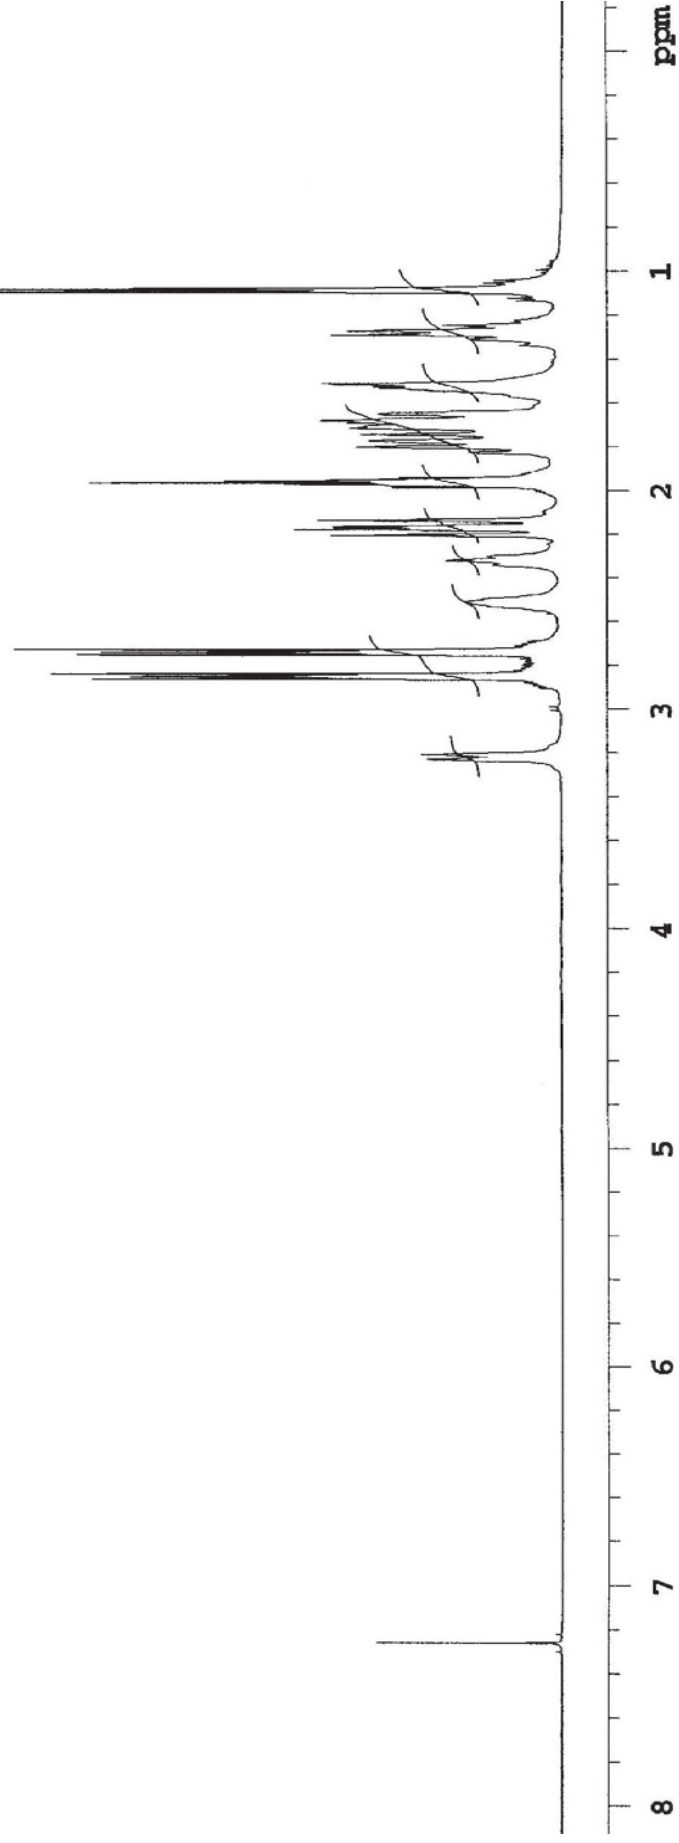

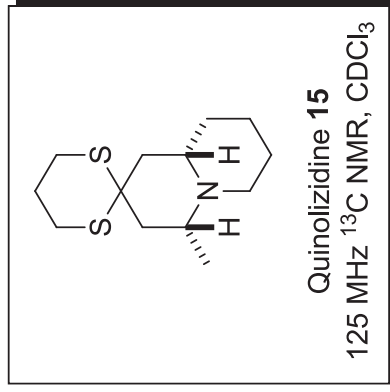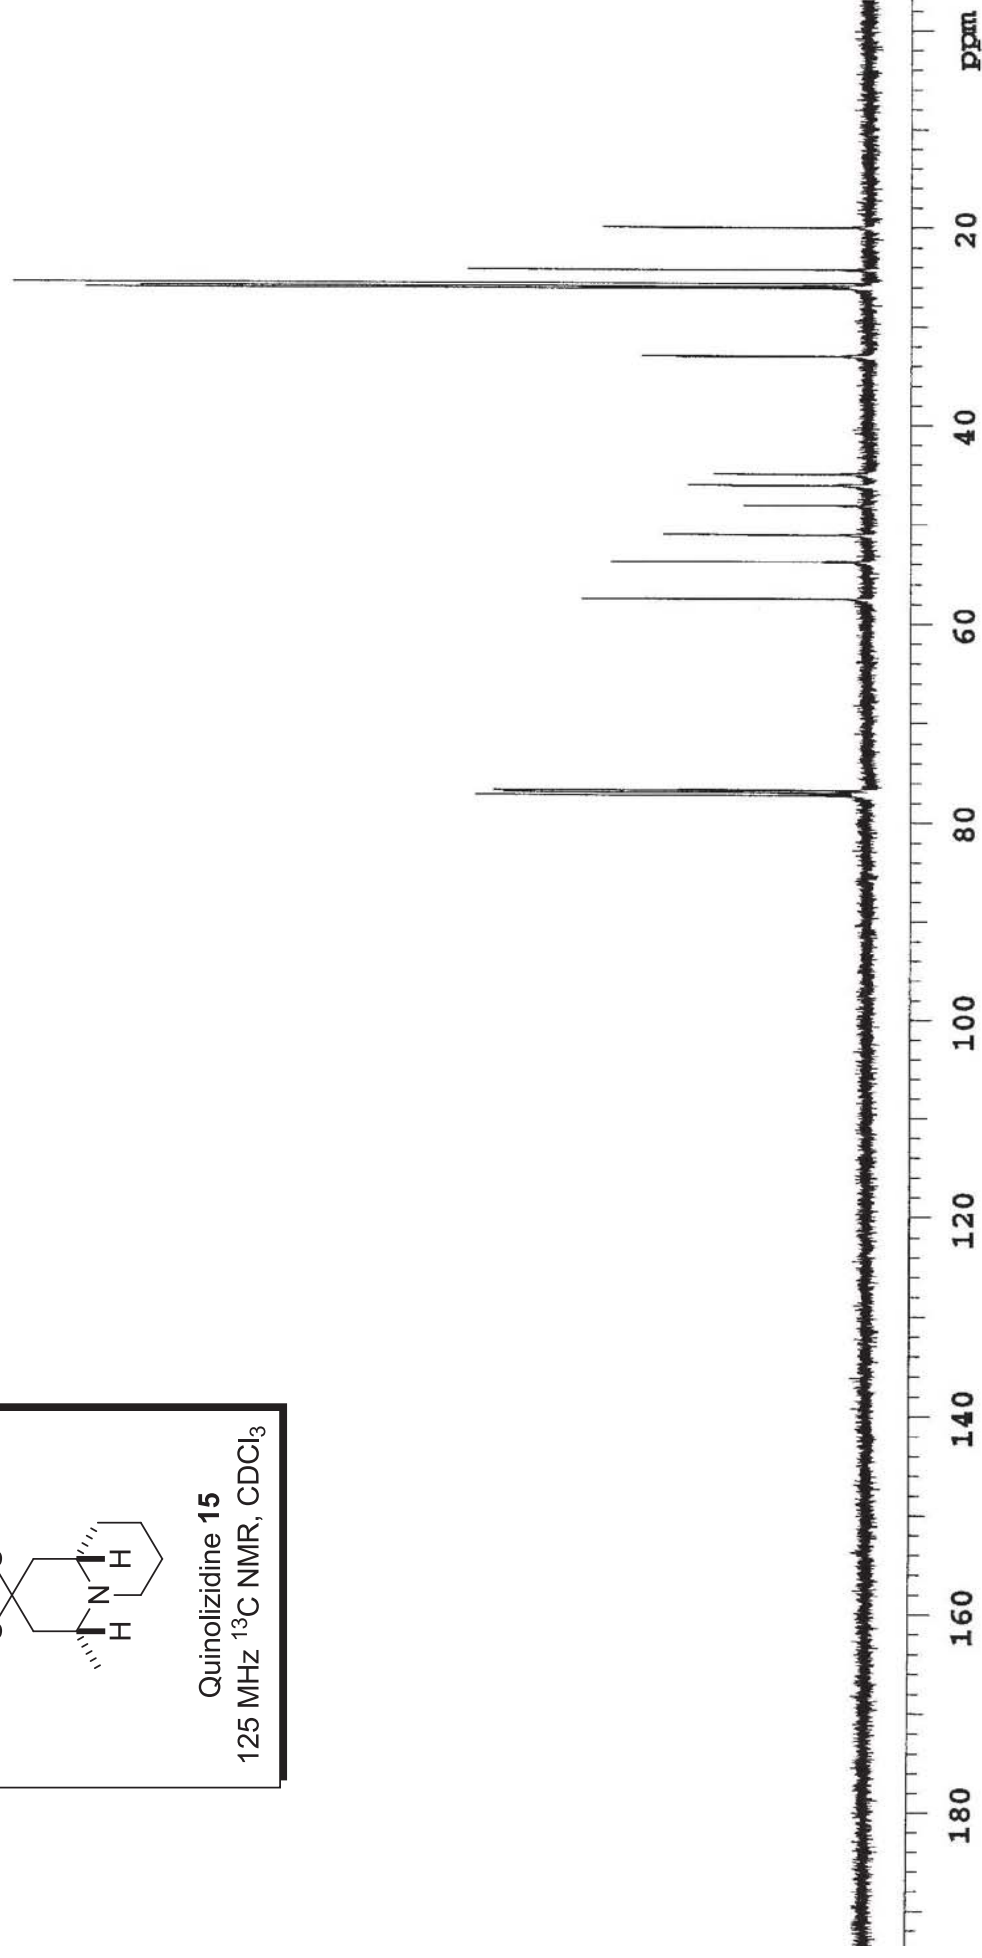

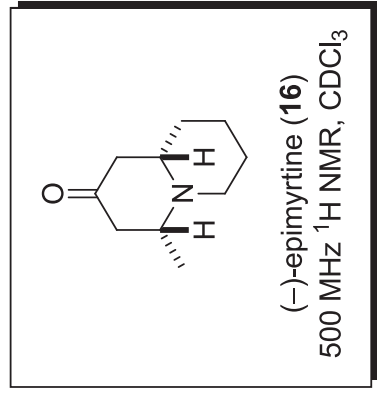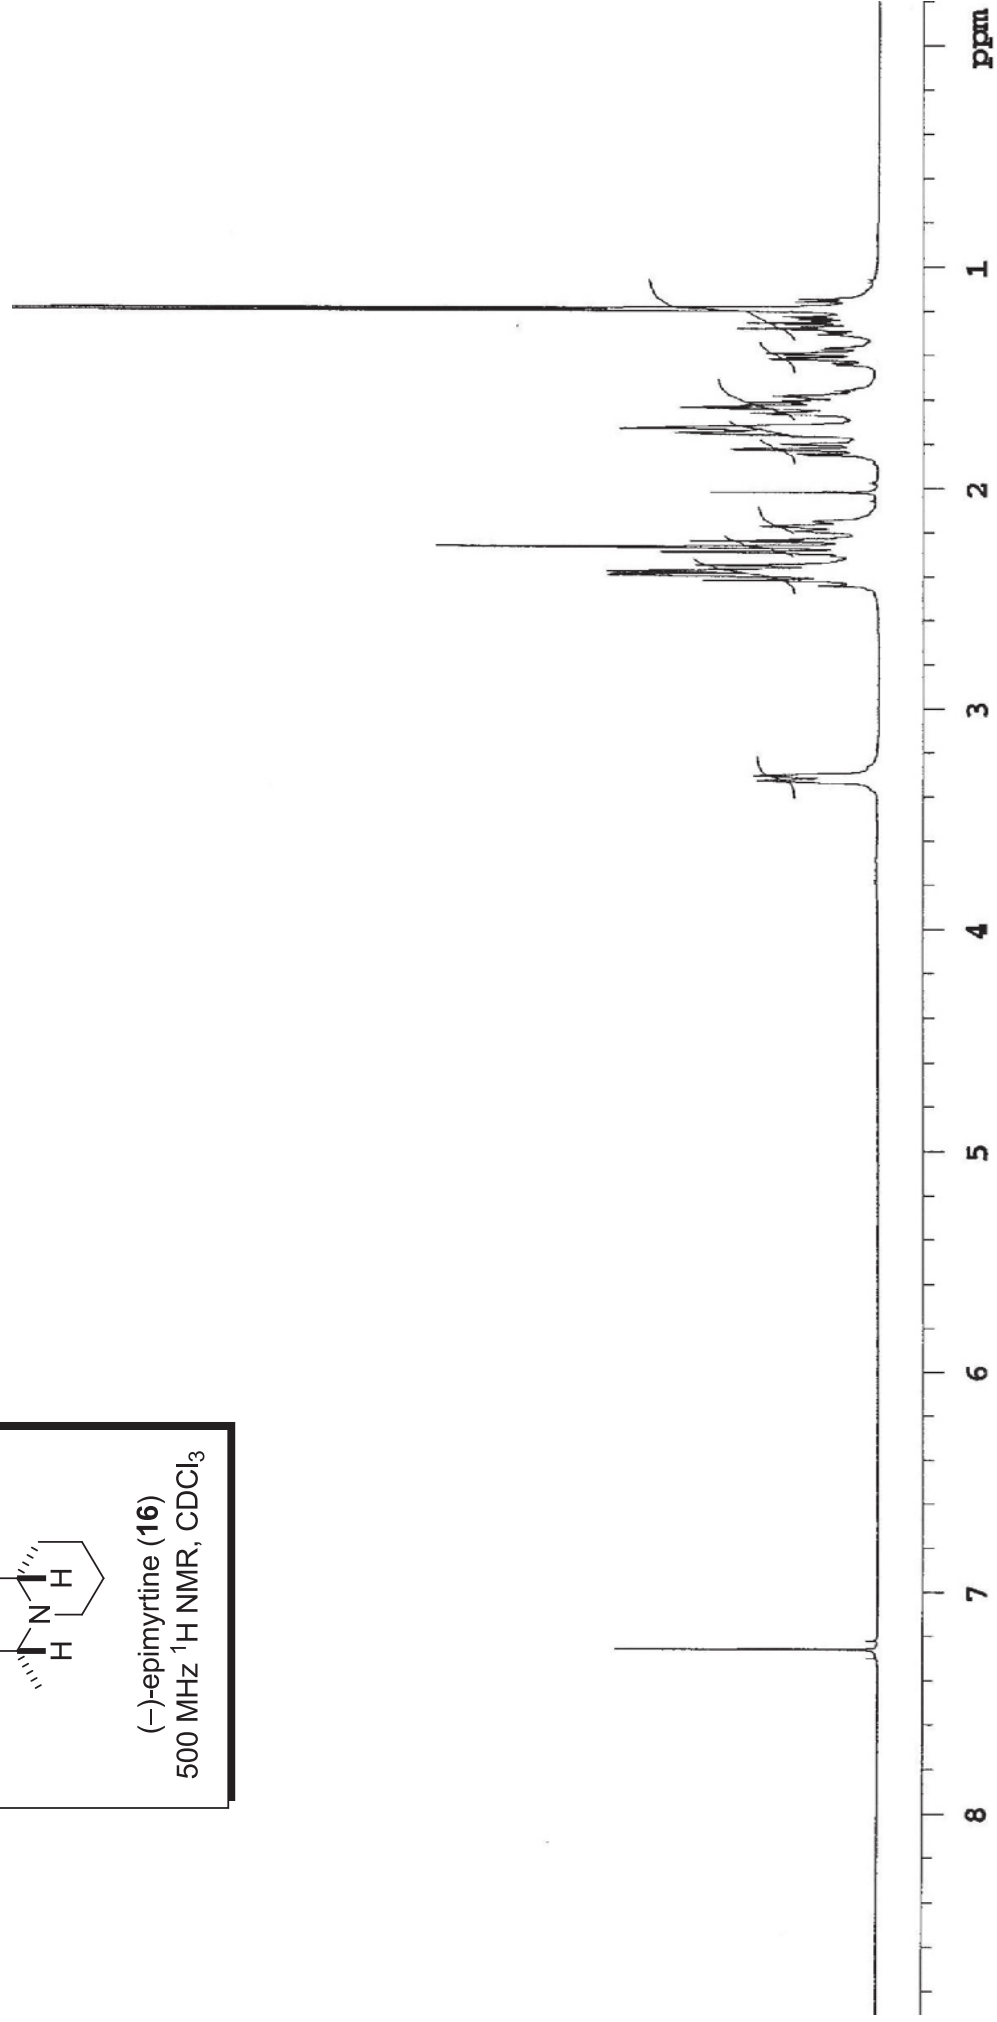

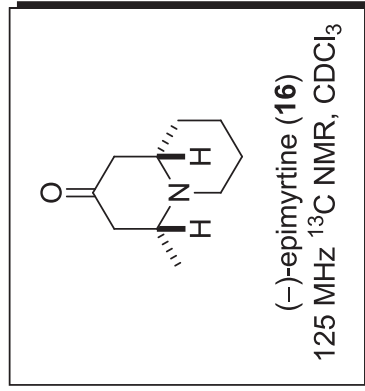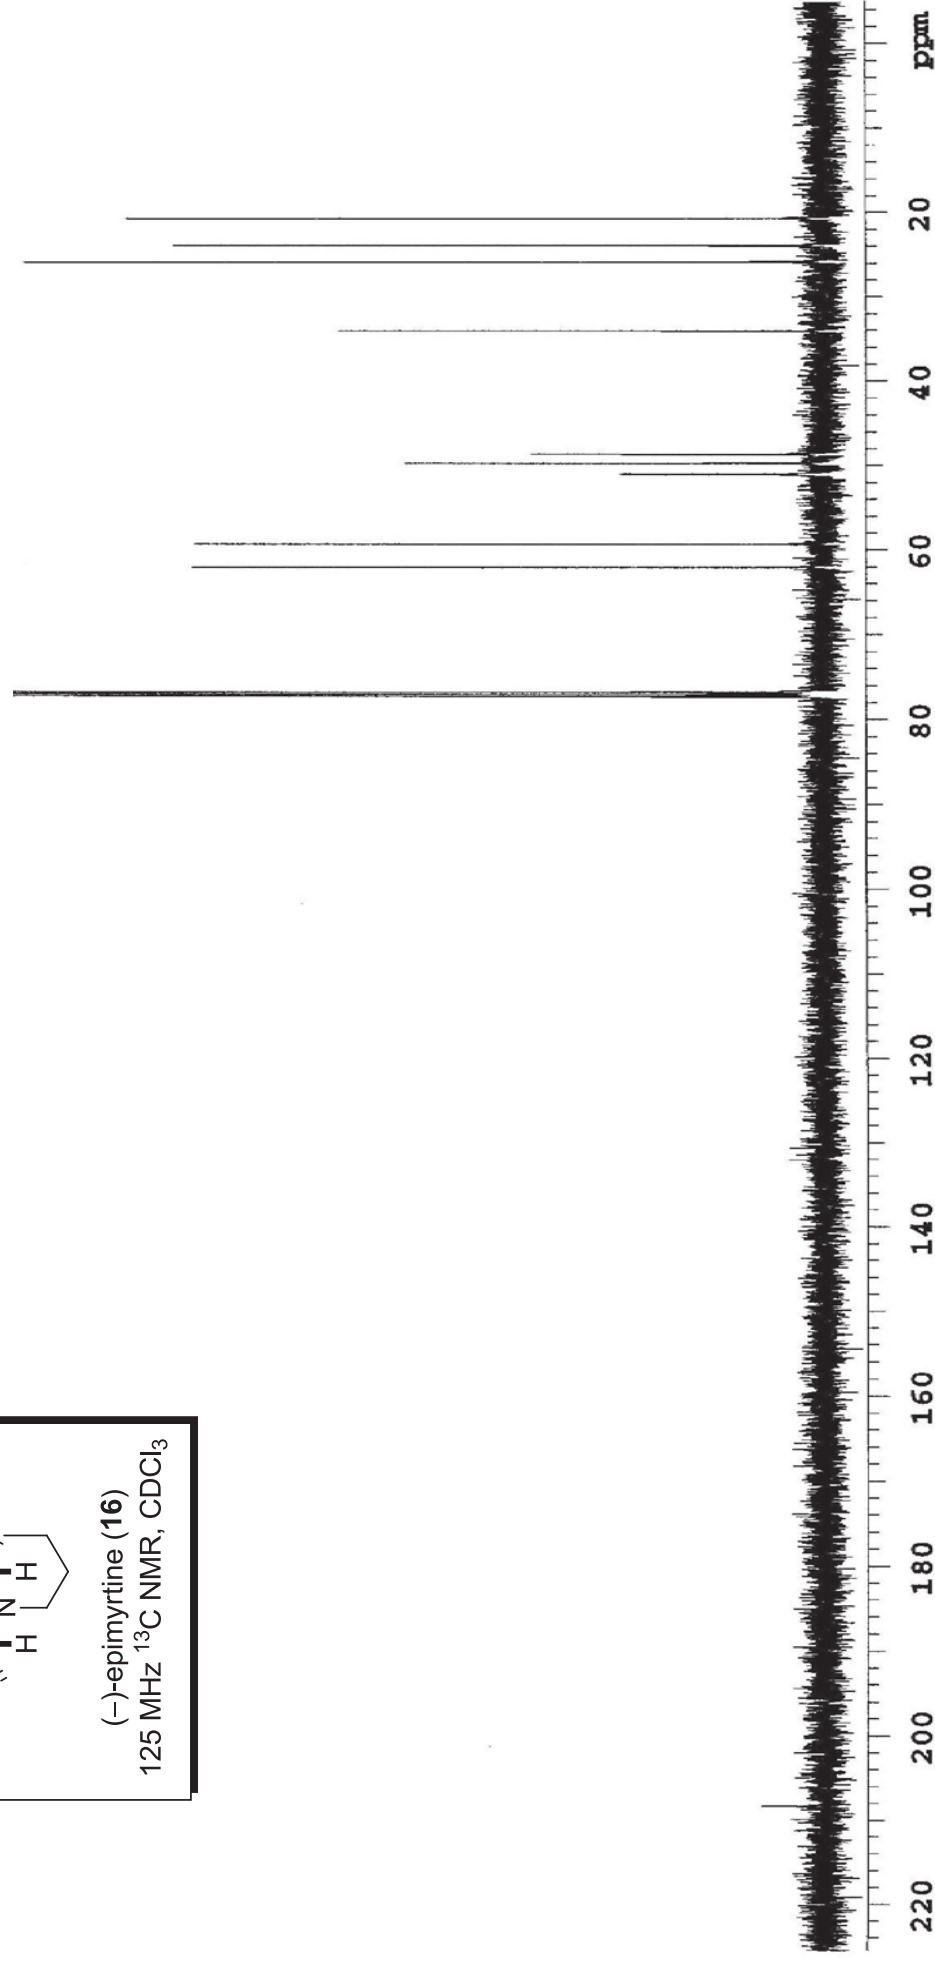

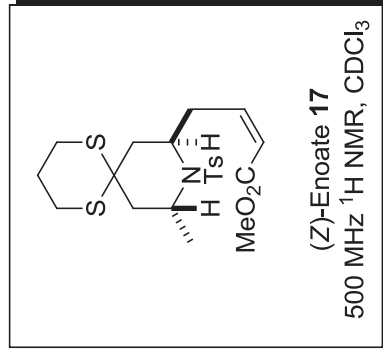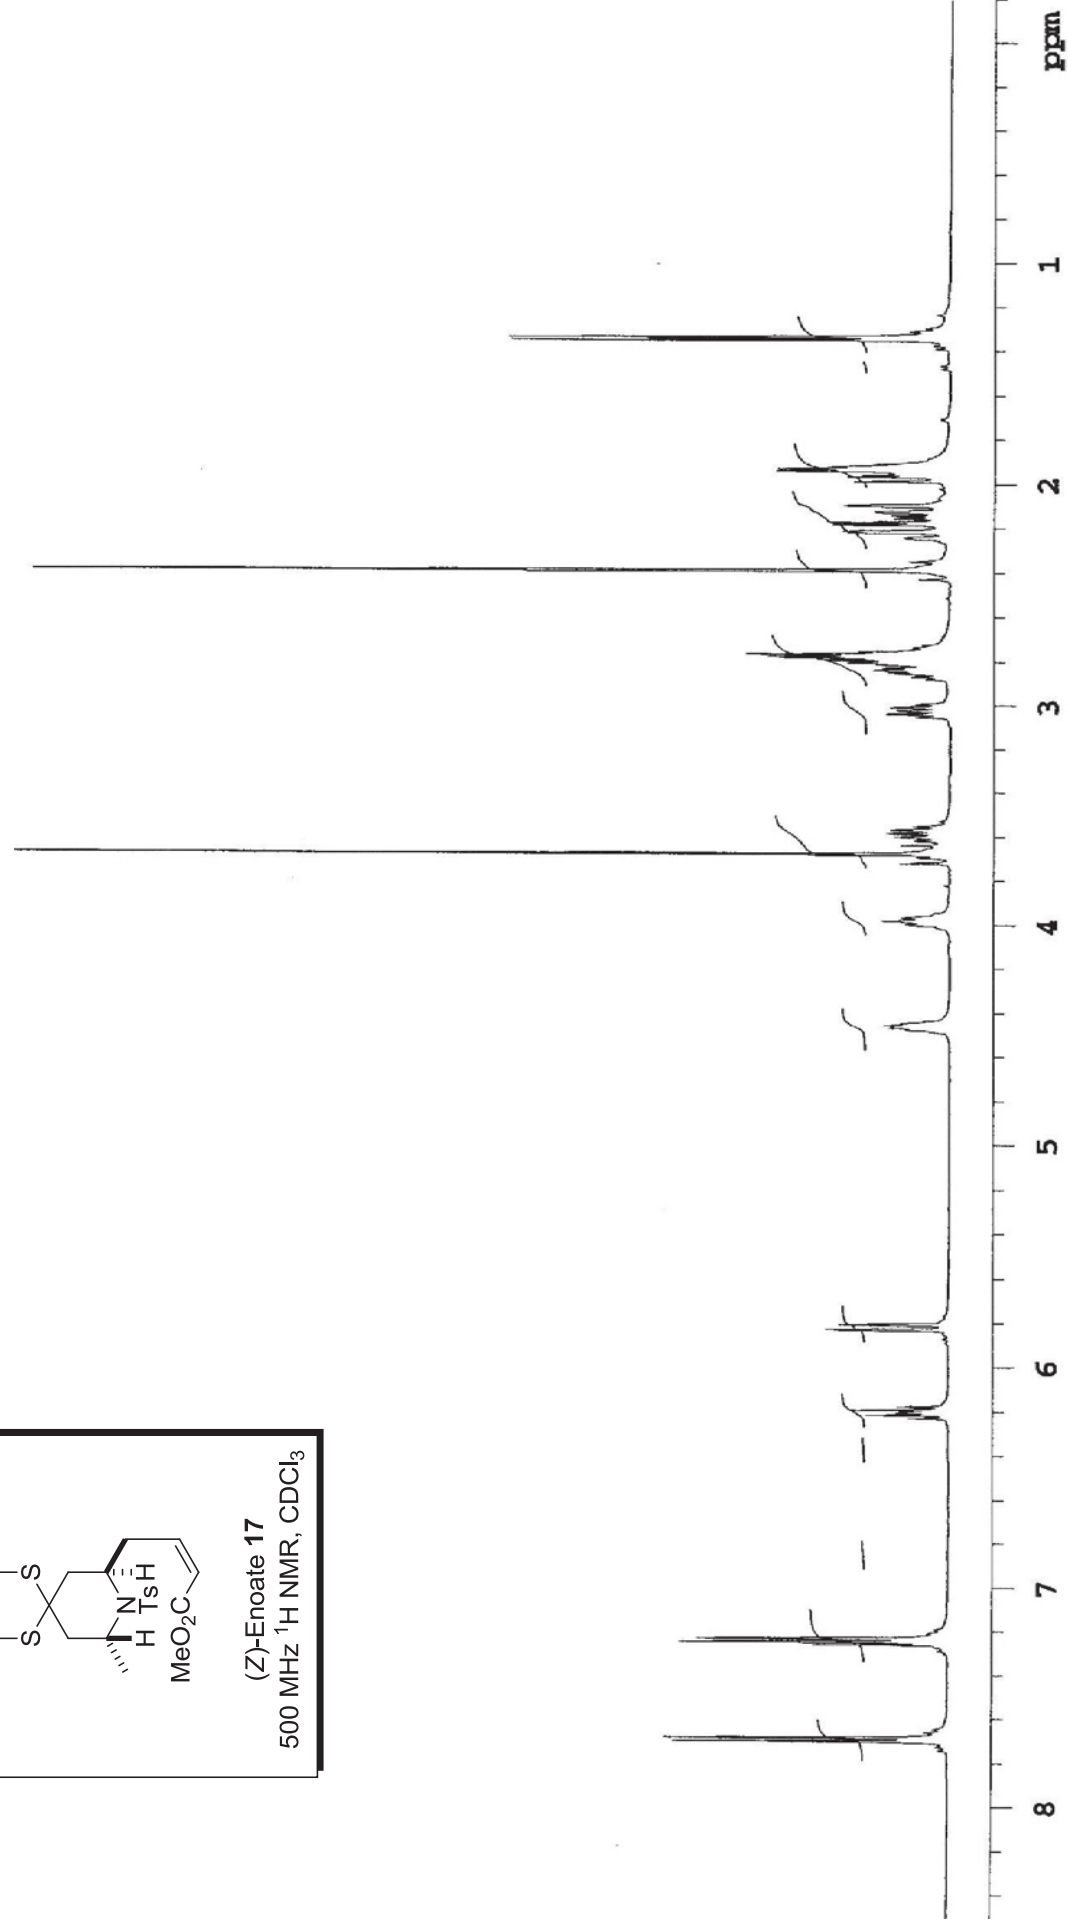

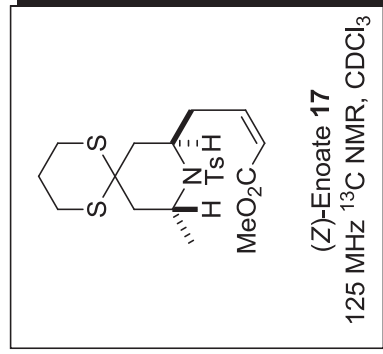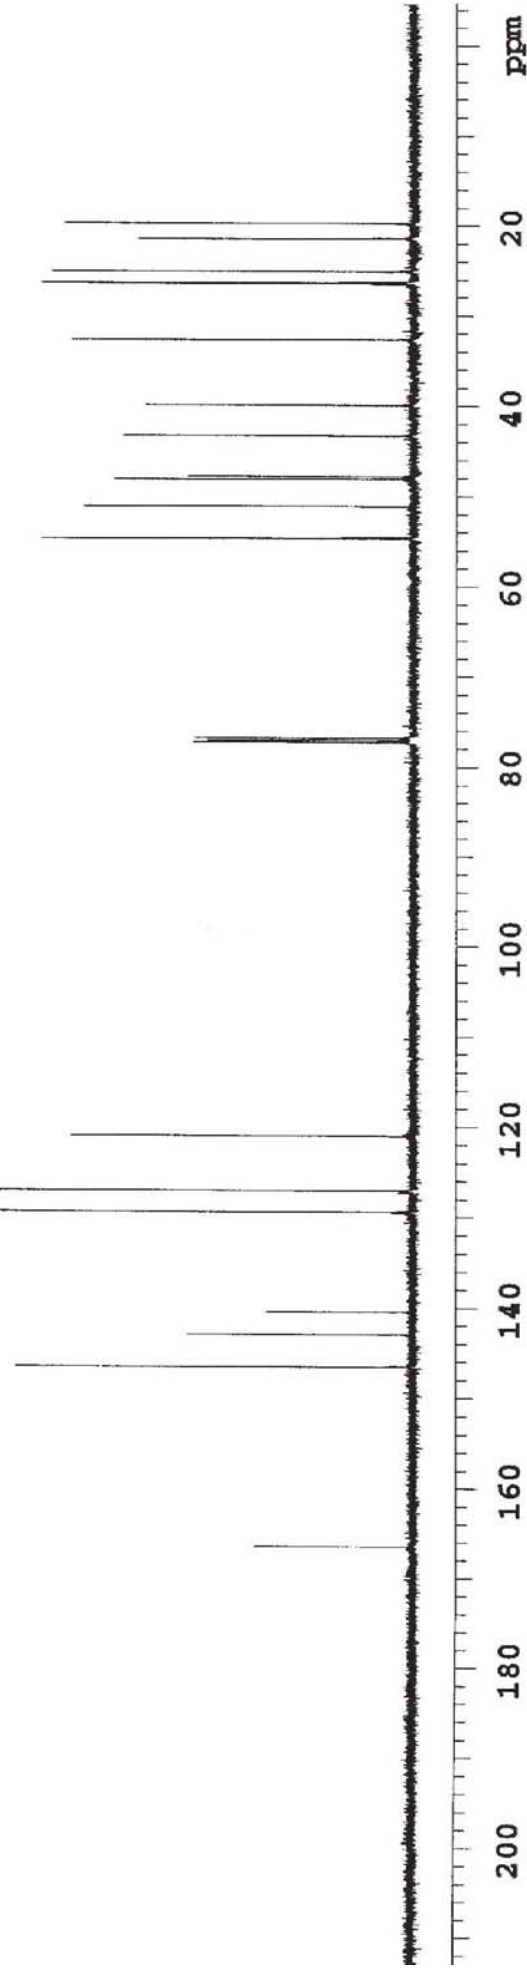

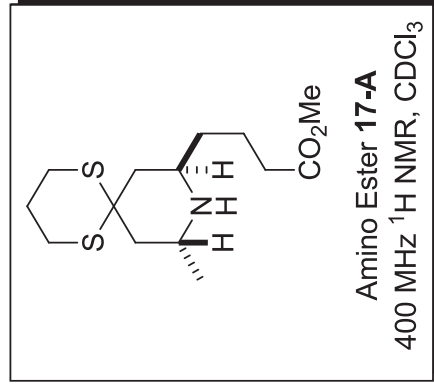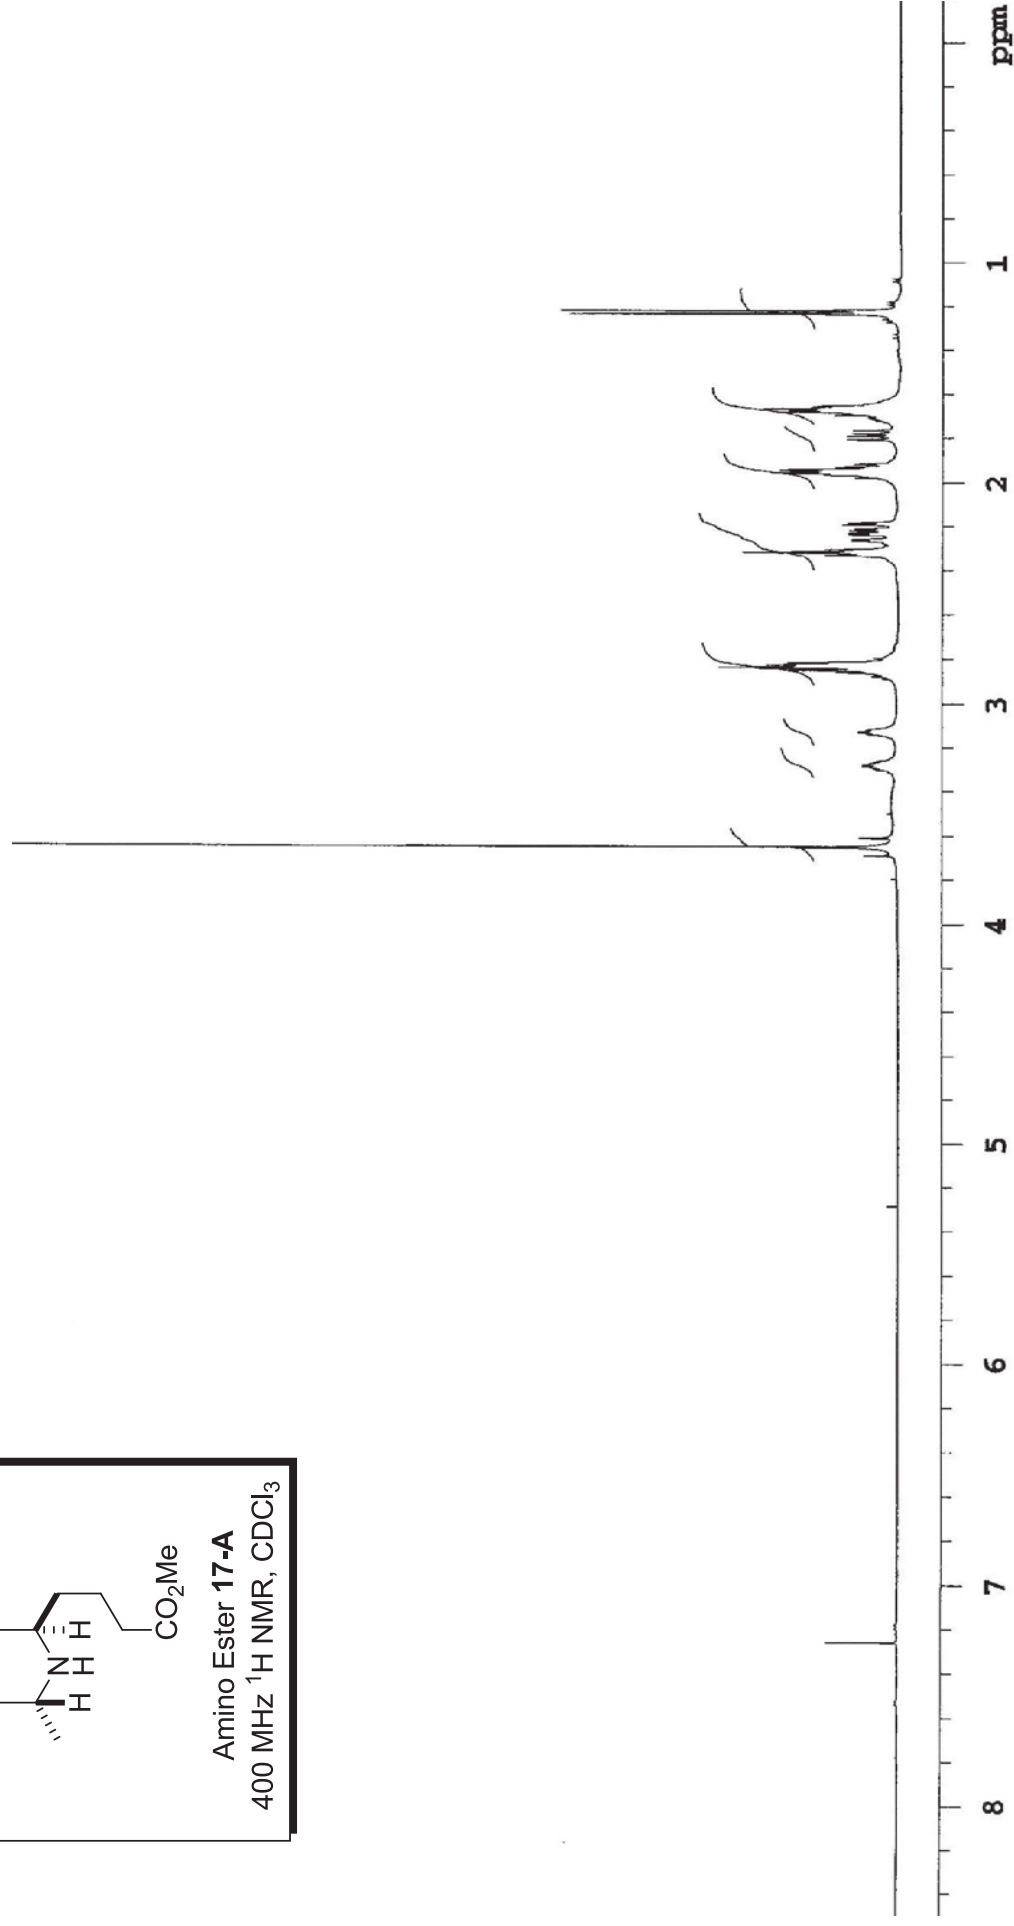



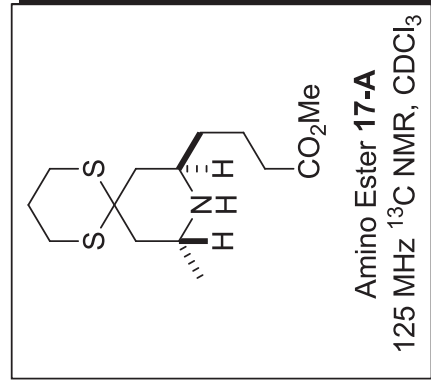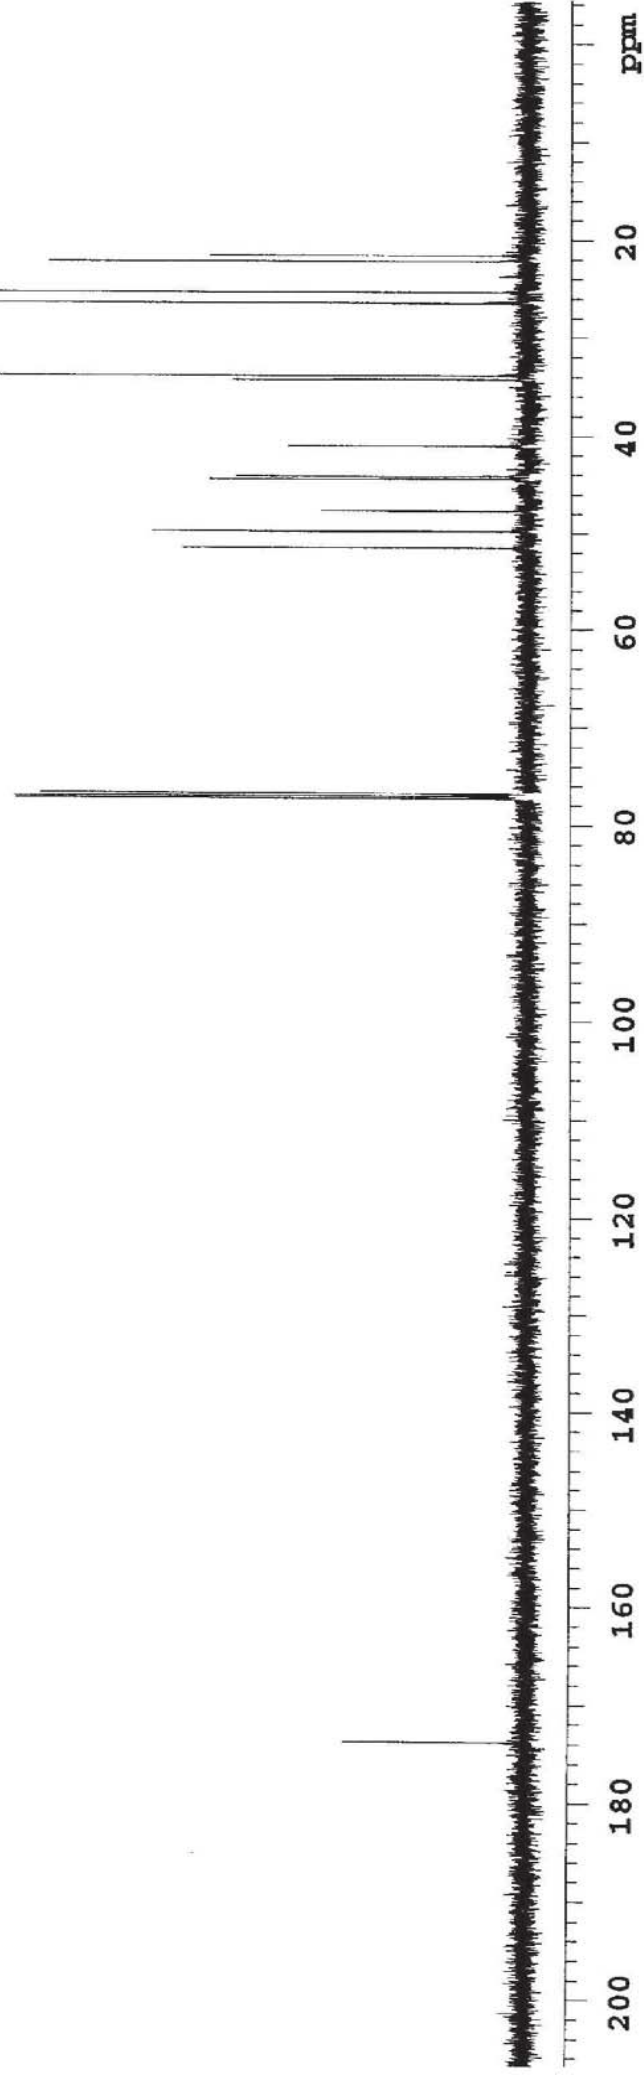

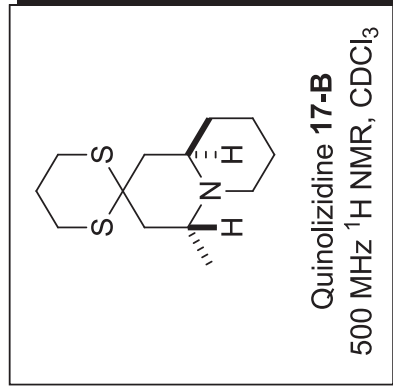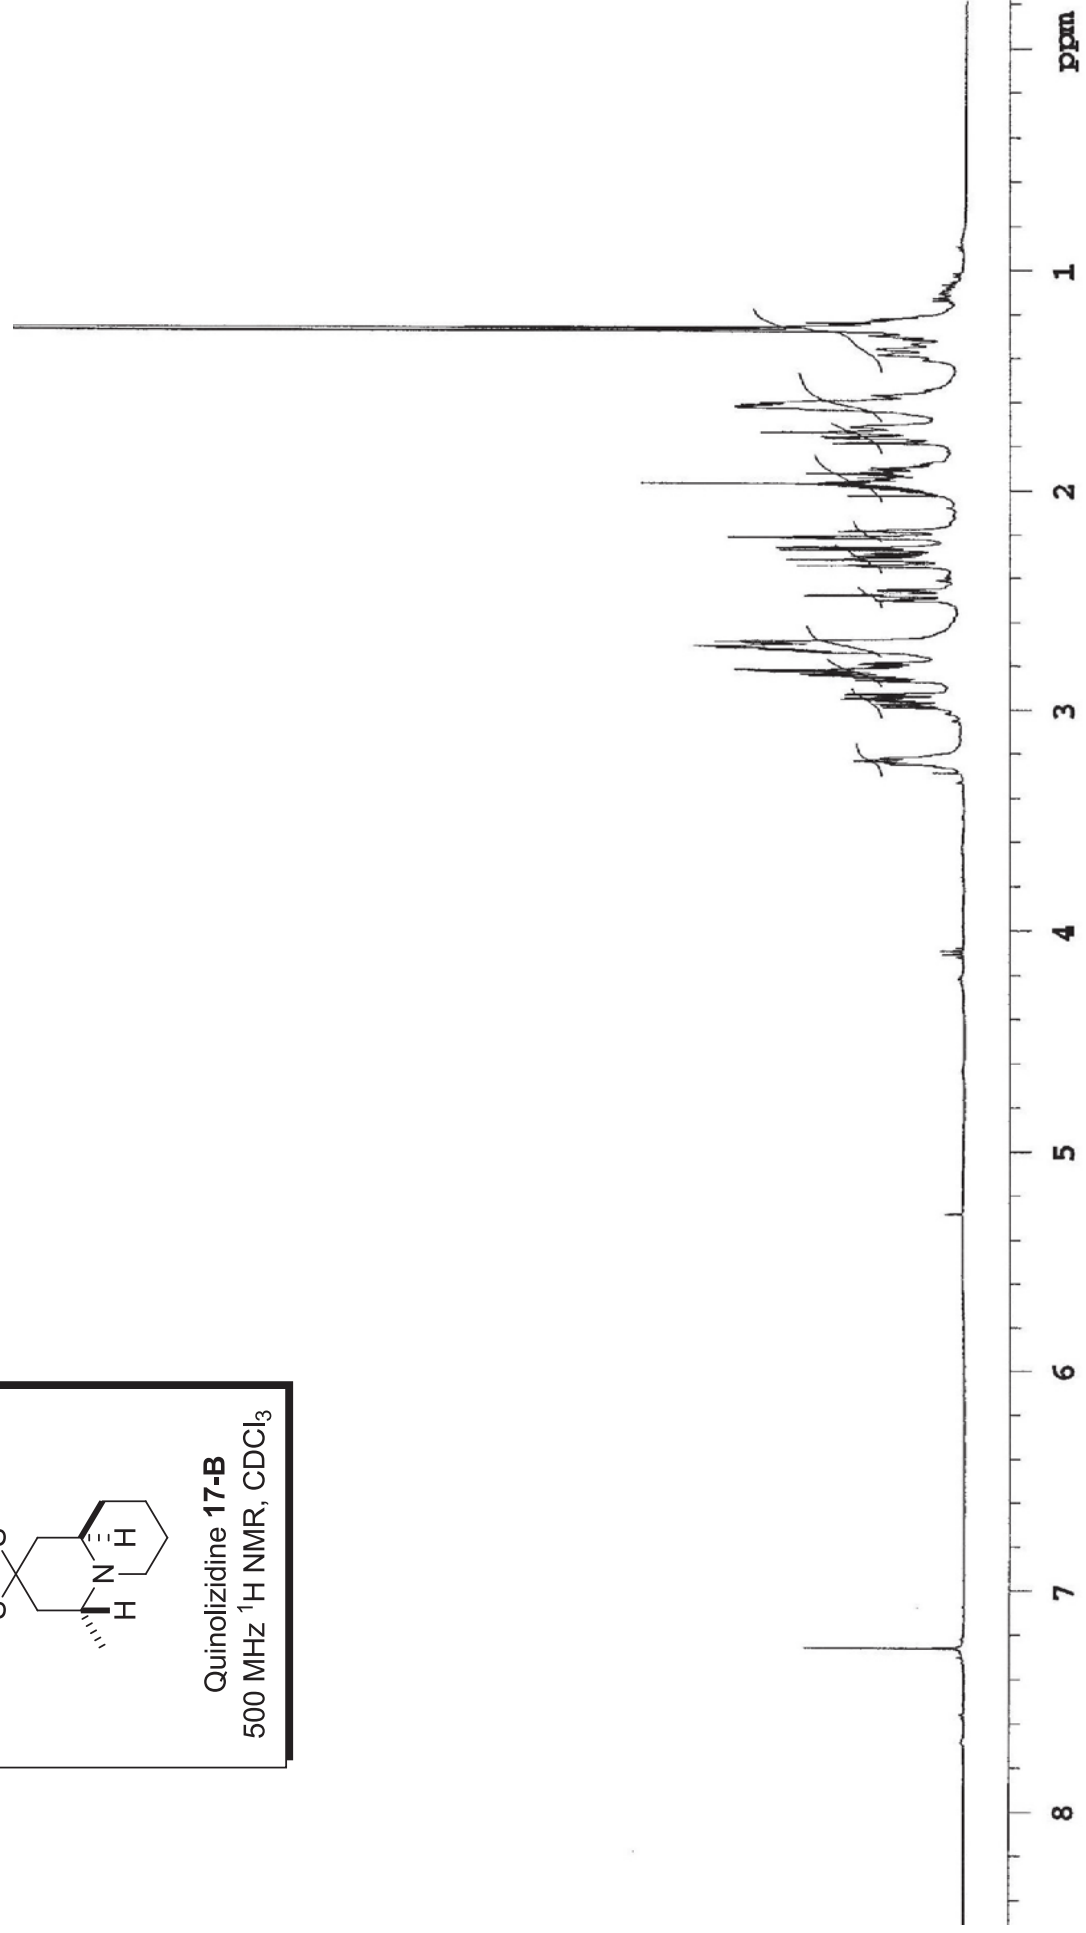

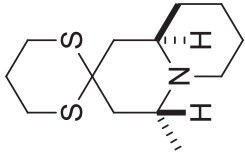

## Quinolizidine 17-B

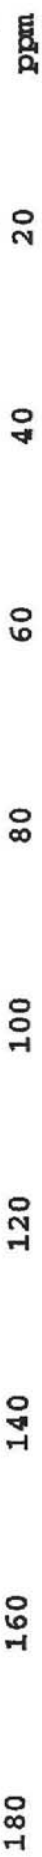

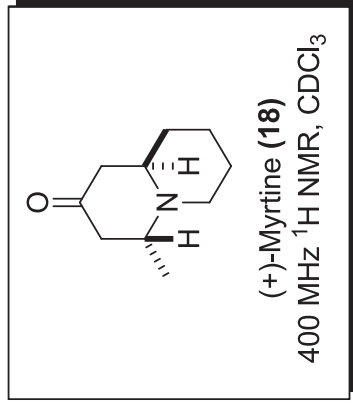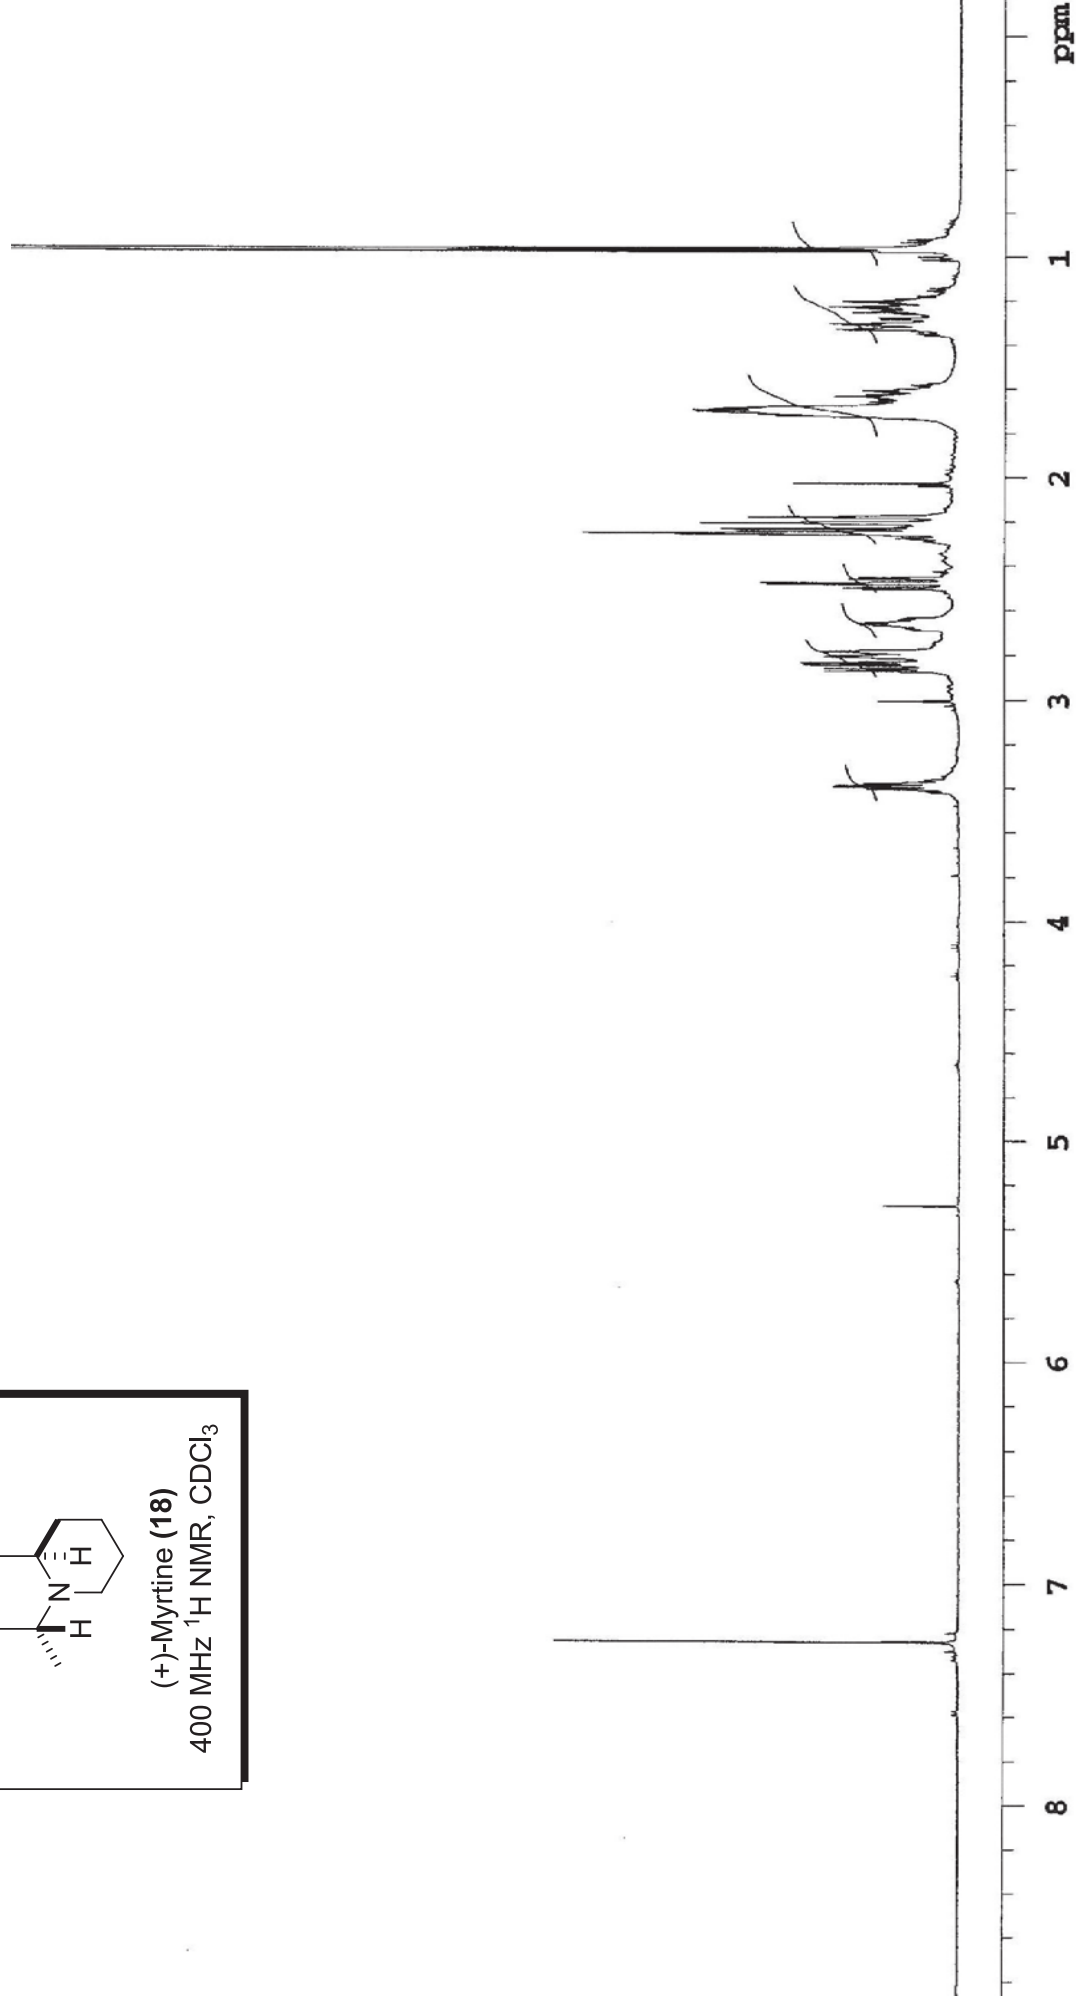

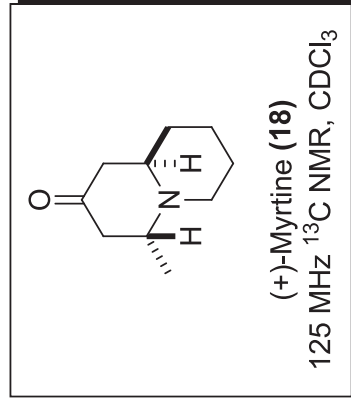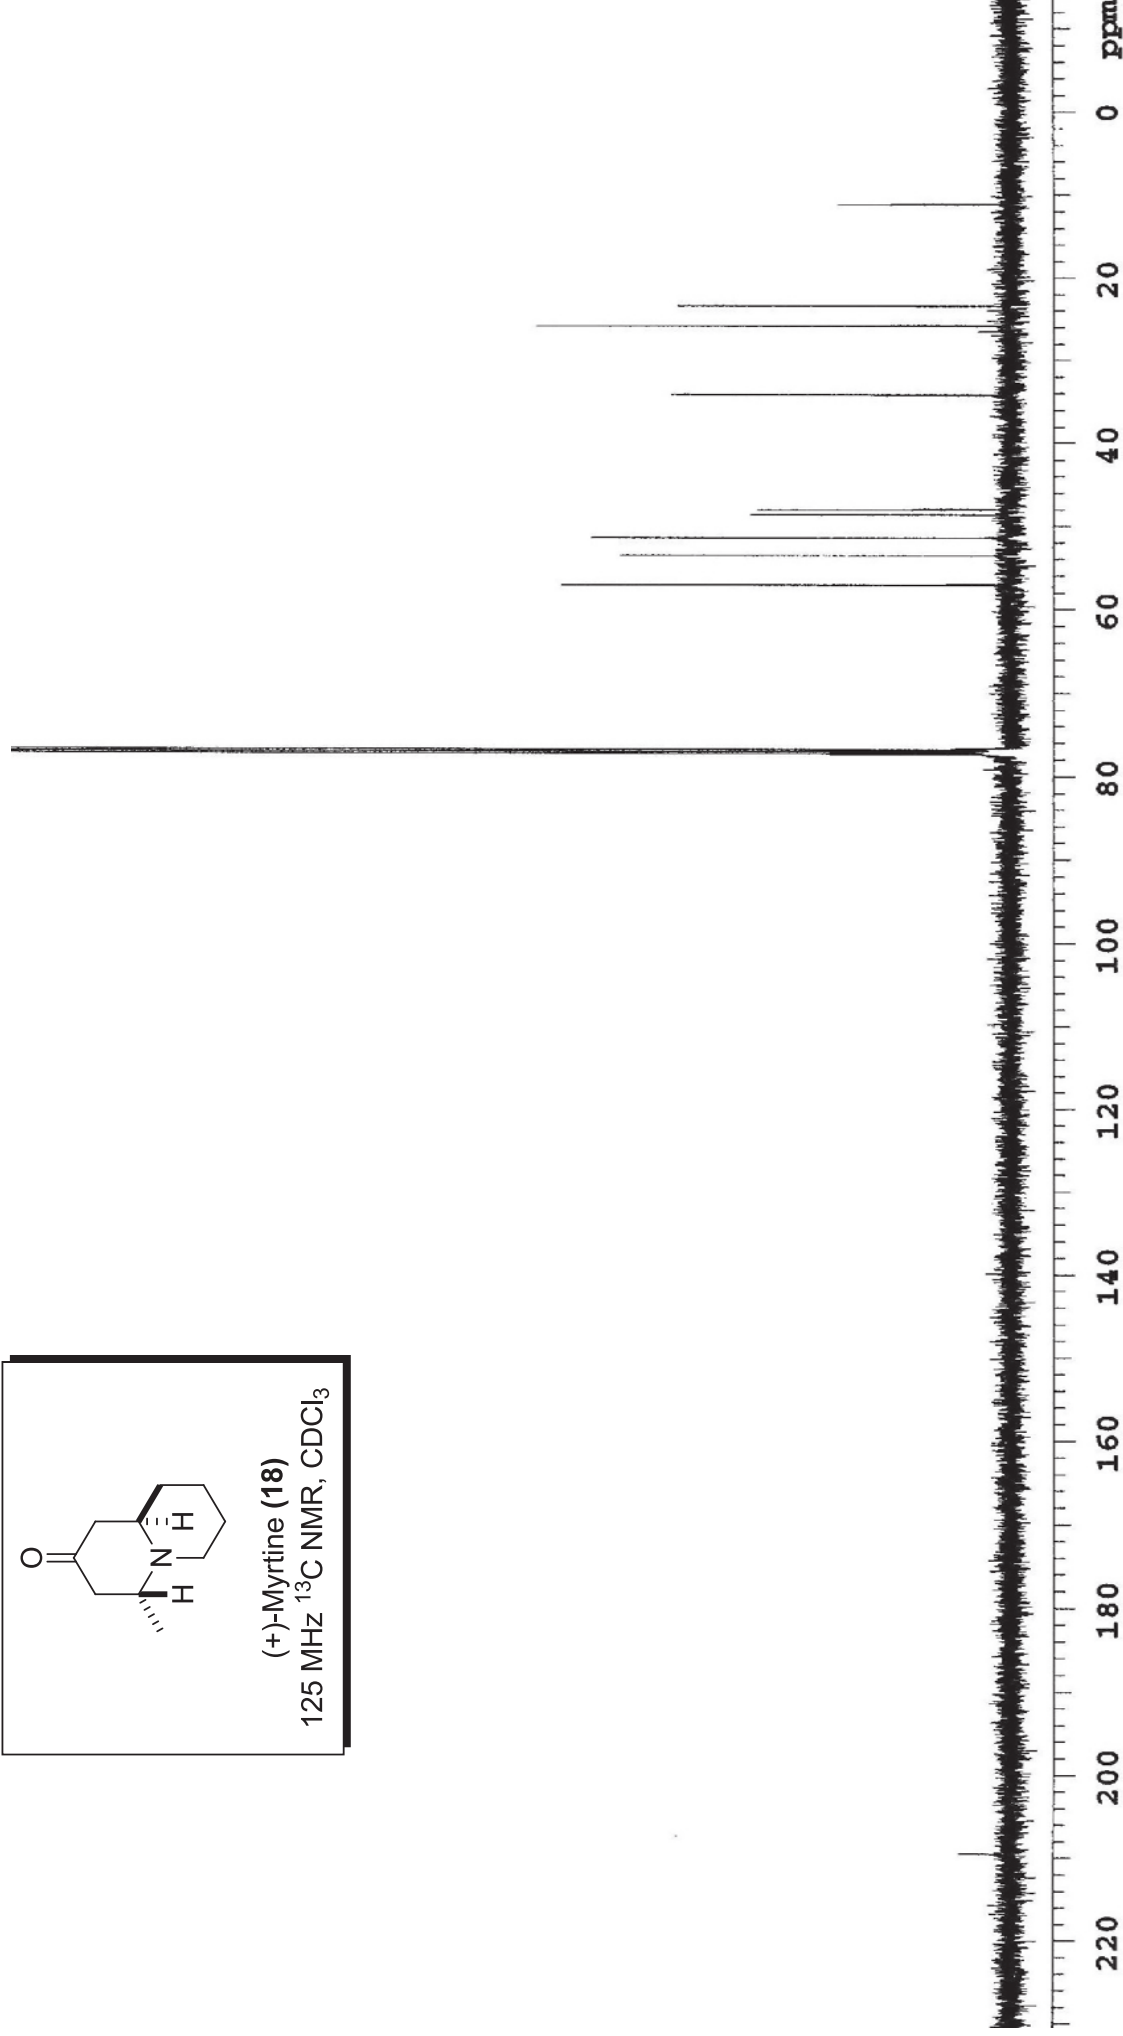

Supplement: Supplementary file 1 [file 4366966]
